# Supplementary material
Source: publisher figshare collection journal article supplement (https://acs.figshare.com/ndownloader/files/10968692)
Supplement: Supplementary file 1 [file 10968692]

# Lewis Acid-Controlled Regioselective Phosphorylation of 2-Indolylmethanols with Diarylphosphine Oxides: Synthesis of Highly Substituted Indoles

Chen Hu,<sup>†</sup> Gang Hong,<sup>‡</sup> Yuchen He<sup>†</sup>, Chen Zhou<sup>†</sup>, Marisa C. Kozlowski<sup>\*,‡</sup> and Limin Wang<sup>\*,†</sup>

<sup>†</sup> Key Laboratory for Advanced Materials, Institute of Fine Chemicals and School of Chemistry & Molecular Engineering, East China University of Science and Technology, 130 Meilong Road, Shanghai 200237, P. R. China

<sup>‡</sup> Department of Chemistry, Roy and Diana Vagelos Laboratories, University of Pennsylvania, Philadelphia, Pennsylvania 19104, United States

## SUPPORTING INFORMATION

### Contents

|                                                                                                      |     |
|------------------------------------------------------------------------------------------------------|-----|
| EXPERIMENTAL SECTION .....                                                                           | S2  |
| 1.1 Optimization of the Reaction Conditions.....                                                     | S2  |
| 1.2 Mechanistic Probes.....                                                                          | S2  |
| 1.3 Crossover Experiment and LCMS Spectra .....                                                      | S3  |
| Copies of <sup>1</sup> H NMR, <sup>13</sup> C NMR, <sup>19</sup> F NMR and <sup>31</sup> P NMR ..... | S6  |
| Crystallographic Data for Compounds <b>3la</b> and <b>4ag</b> .....                                  | S95 |

## EXPERIMENTAL SECTION

### 1.1 Optimization of the Reaction Conditions<sup>a</sup>

Table S1. Optimization of the Reaction Conditions.

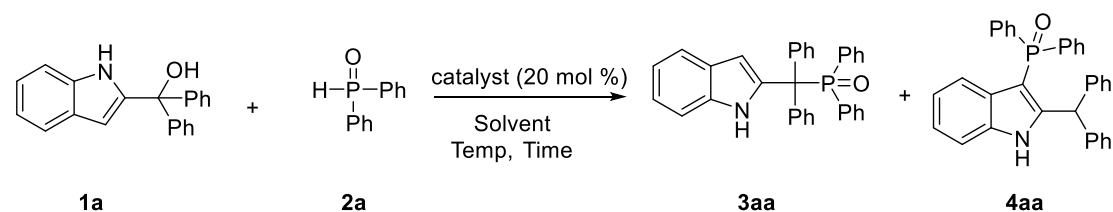

| Entry | Catalyst (20 mol %)       | Solvent            | Temp (°C) | Time (h) | Yield <sup>b</sup> (%) |
|-------|---------------------------|--------------------|-----------|----------|------------------------|
| 1     | Y(Pfb) <sub>3</sub>       | DCE                | 100       | 12       | 72/0                   |
| 2     | Y(Pfb) <sub>3</sub>       | DCM                | 100       | 12       | 69/trace               |
| 3     | Y(Pfb) <sub>3</sub>       | CHCl <sub>3</sub>  | 100       | 12       | 84/0                   |
| 4     | Y(Pfb) <sub>3</sub>       | DMSO               | 100       | 12       | 53/0                   |
| 5     | Y(Pfb) <sub>3</sub>       | DMF                | 100       | 12       | 69/trace               |
| 6     | Y(Pfb) <sub>3</sub>       | CH <sub>3</sub> CN | 120       | 12       | 79/trace               |
| 7     | Y(Pfb) <sub>3</sub>       | CH <sub>3</sub> CN | 80        | 12       | 62/trace               |
| 8     | Y(Pfb) <sub>3</sub>       | CH <sub>3</sub> CN | 100       | 16       | 80/trace               |
| 9     | Y(Pfb) <sub>3</sub>       | CH <sub>3</sub> CN | 100       | 8        | 83/trace               |
| 10    | Y(Pfb) <sub>3</sub> (10)  | CH <sub>3</sub> CN | 100       | 12       | 76/trace               |
| 11    | Y(Pfb) <sub>3</sub> (30)  | CH <sub>3</sub> CN | 100       | 12       | 88/trace               |
| 12    | Yb(OTf) <sub>3</sub>      | DCE                | 100       | 12       | 0/63                   |
| 13    | Yb(OTf) <sub>3</sub>      | DCM                | 100       | 12       | 0/32                   |
| 14    | Yb(OTf) <sub>3</sub>      | CHCl <sub>3</sub>  | 100       | 12       | 0/40                   |
| 15    | Yb(OTf) <sub>3</sub>      | DMSO               | 100       | 12       | Trace/43               |
| 16    | Yb(OTf) <sub>3</sub>      | DMF                | 100       | 12       | Trace/47               |
| 17    | Yb(OTf) <sub>3</sub>      | CH <sub>3</sub> CN | 120       | 12       | 0/73                   |
| 18    | Yb(OTf) <sub>3</sub>      | CH <sub>3</sub> CN | 80        | 12       | 0/69                   |
| 19    | Yb(OTf) <sub>3</sub>      | CH <sub>3</sub> CN | 100       | 16       | 0/76                   |
| 20    | Yb(OTf) <sub>3</sub>      | CH <sub>3</sub> CN | 100       | 8        | Trace/70               |
| 21    | Yb(OTf) <sub>3</sub> (10) | CH <sub>3</sub> CN | 100       | 12       | Trace/55               |
| 22    | Yb(OTf) <sub>3</sub> (30) | CH <sub>3</sub> CN | 100       | 12       | 0/74                   |

<sup>a</sup>Reaction conditions: **1a** (0.25 mmol), **2a** (0.375 mmol), catalyst (20 mol %), CH<sub>3</sub>CN (2 mL) at indicated temperature for indicated time, under air.

### 1.2 Mechanistic Probes

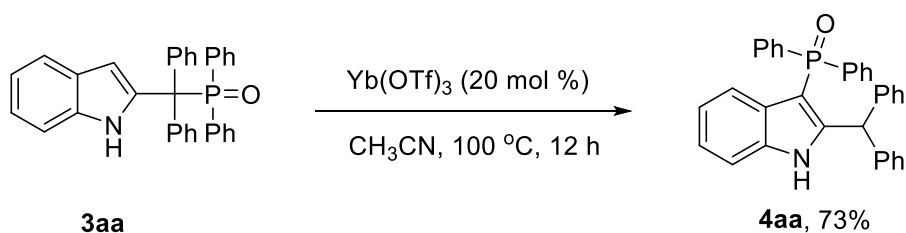

((1H-indol-2-yl)diphenylmethyl)diphenylphosphine oxide **3aa** (120.89 mg, 0.25 mmol, 1 equiv.), Yb(OTf)<sub>3</sub> (31.01 mg, 0.05 mmol, 0.2 equiv), dry CH<sub>3</sub>CN (2 mL) and a stir bar were added to a sealed tube. After being stirred at 100 °C for 12 h, the mixture was evaporated under vacuum. The corresponding product **4aa** was isolated by silica gel column chromatography with a dichloromethane/ethyl acetate (10/1) mixture as eluent to afford **4aa** (352.99 mg) in 73% yield.

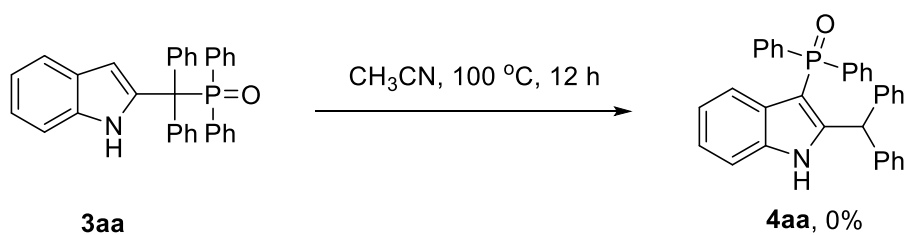

The same procedure was followed using **3aa** without adding Yb(OTf)<sub>3</sub> (31.01 mg, 0.05 mmol, 0.2 equiv.), no desired product **4aa** was detected.

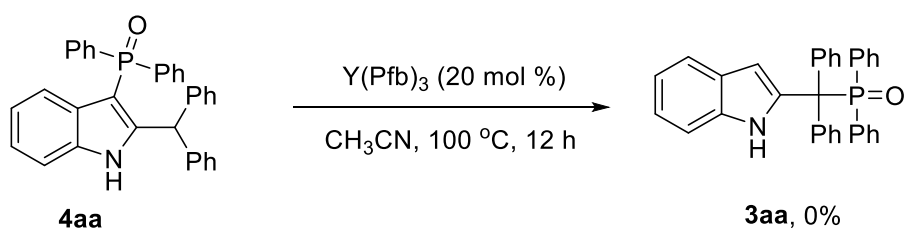

The same procedure was followed using **4aa** with adding Y(Pfb)<sub>3</sub> (36.10 mg, 0.05 mmol, 0.2 equiv.), no desired product **3aa** was detected.

### 1.3 Crossover Experiment and LCMS Spectra

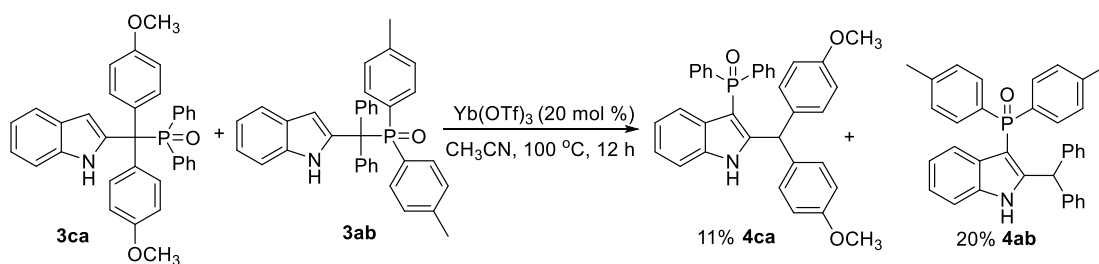

**3ca** (543.60 mg, 0.1 mmol, 1 equiv.), **3ab** (511.60 mg, 0.1 mmol, 1 equiv.), dry  $\text{CH}_3\text{CN}$  (2 mL),  $\text{Yb}(\text{OTf})_3$  (31.01 mg, 0.05 mmol, 20 mol %) and a stir bar were added to a sealed tube. After being stirred at  $100^\circ\text{C}$  for 12 h, the mixture was evaporated under vacuum. The rearranged products **4ca** (59.80 mg, 11% yield) and **4ab** (102.3 mg, 20% yield) were isolated by silica gel column chromatography with a dichloromethane/ethyl acetate (100/1 to 10/1) mixture as eluent. No crossover products were observed by LCMS. (See below)

(a)

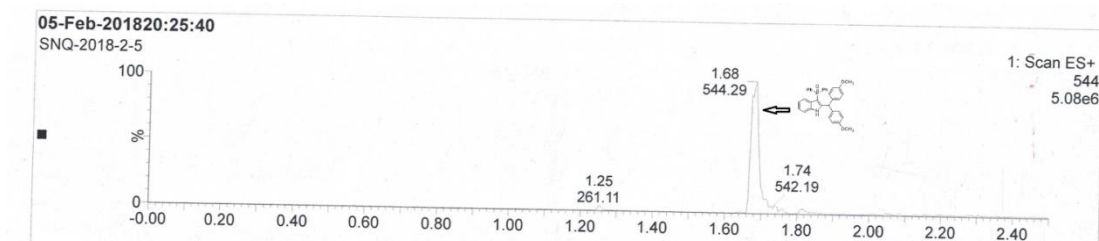

(b)

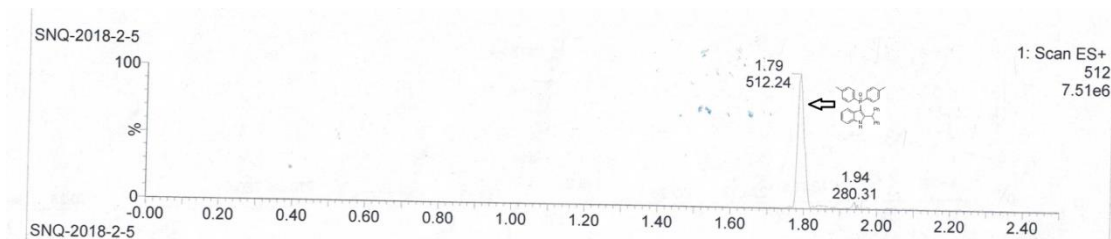

(c)

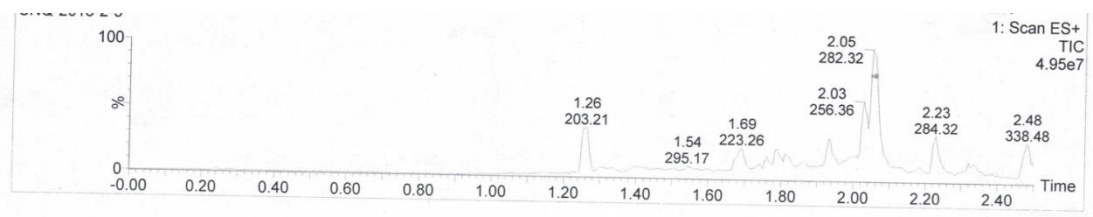

(d)

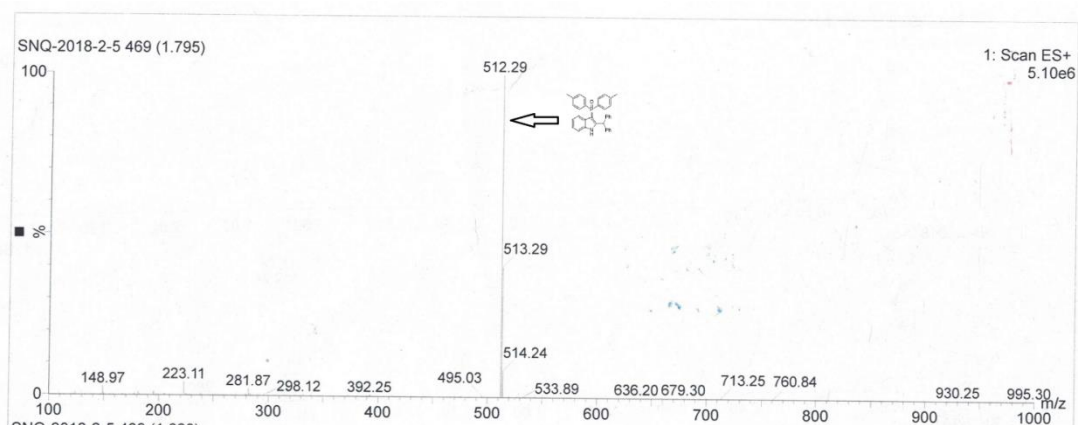

(e)

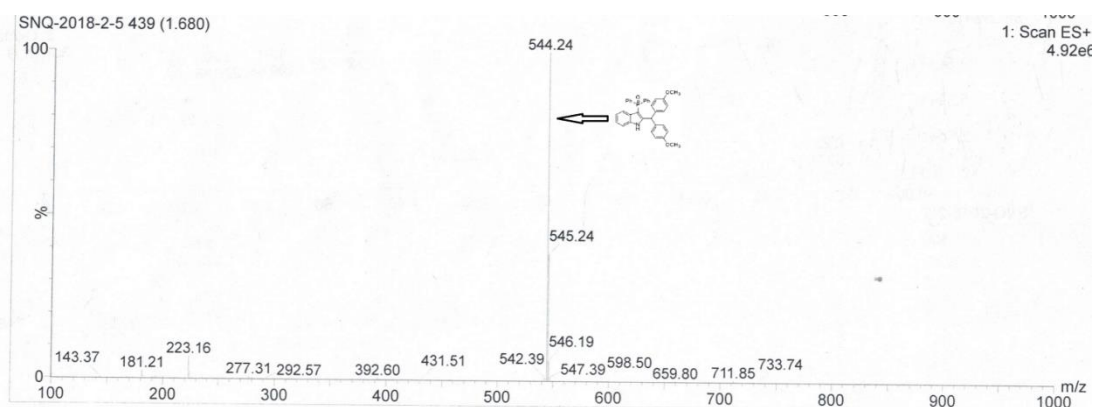

Figure S1. (a) Retention time of **4ca**. (b) Retention time of **4ab**. (c) Reaction LCMS (d) MS of **4ab**. (e)

MS of **4ca**.

**3aa**

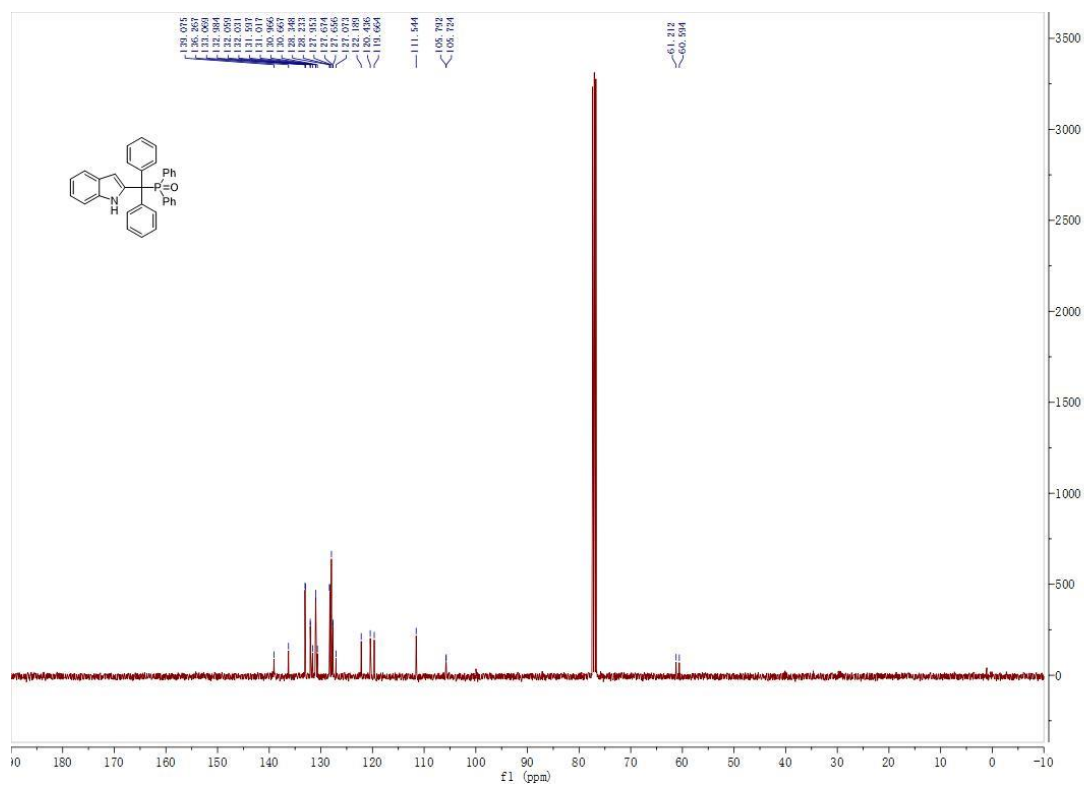

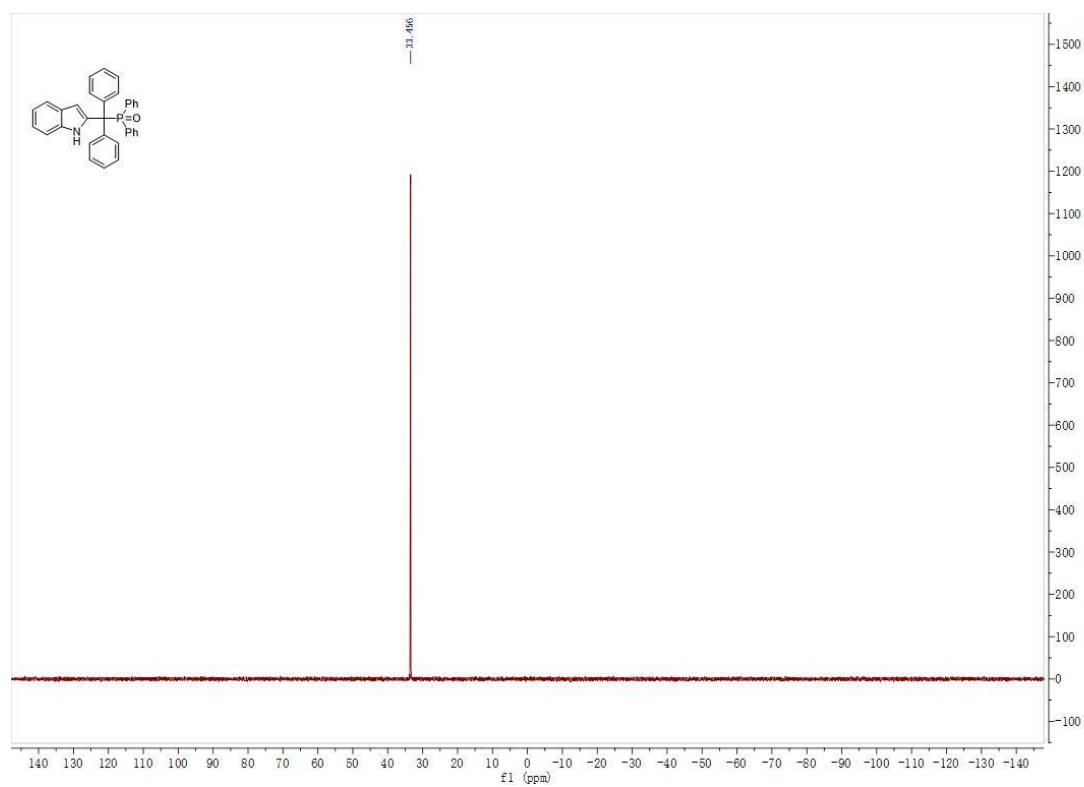

**3ba**

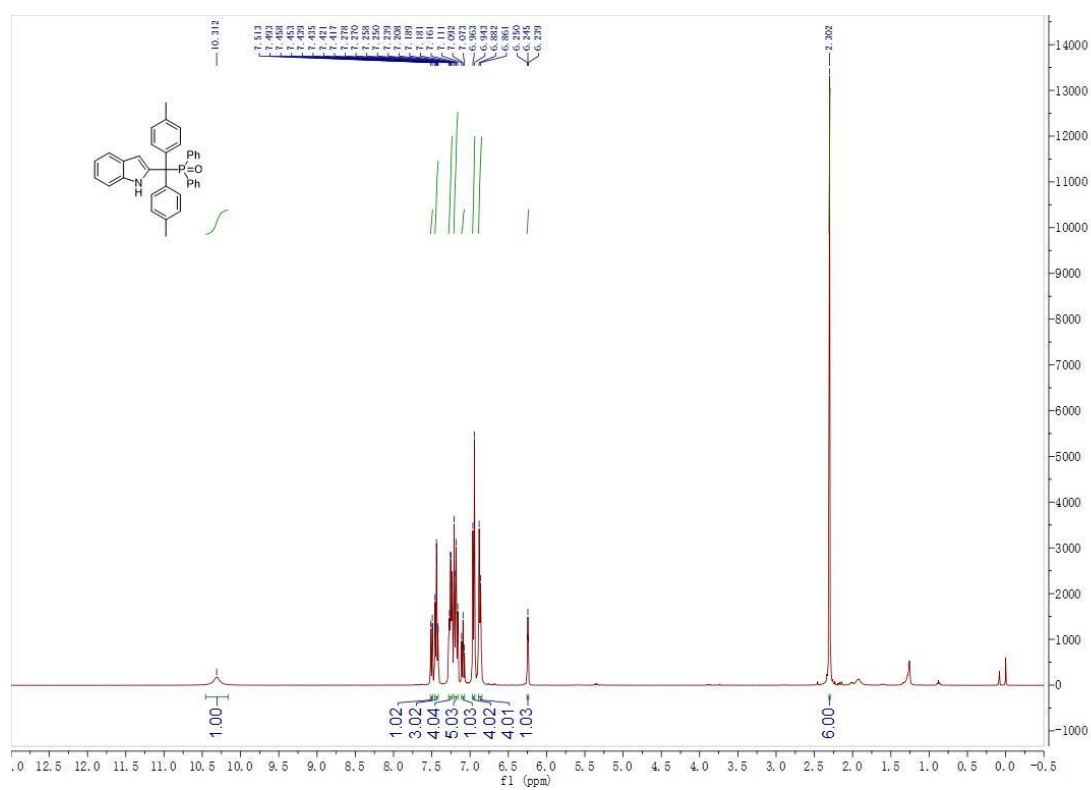

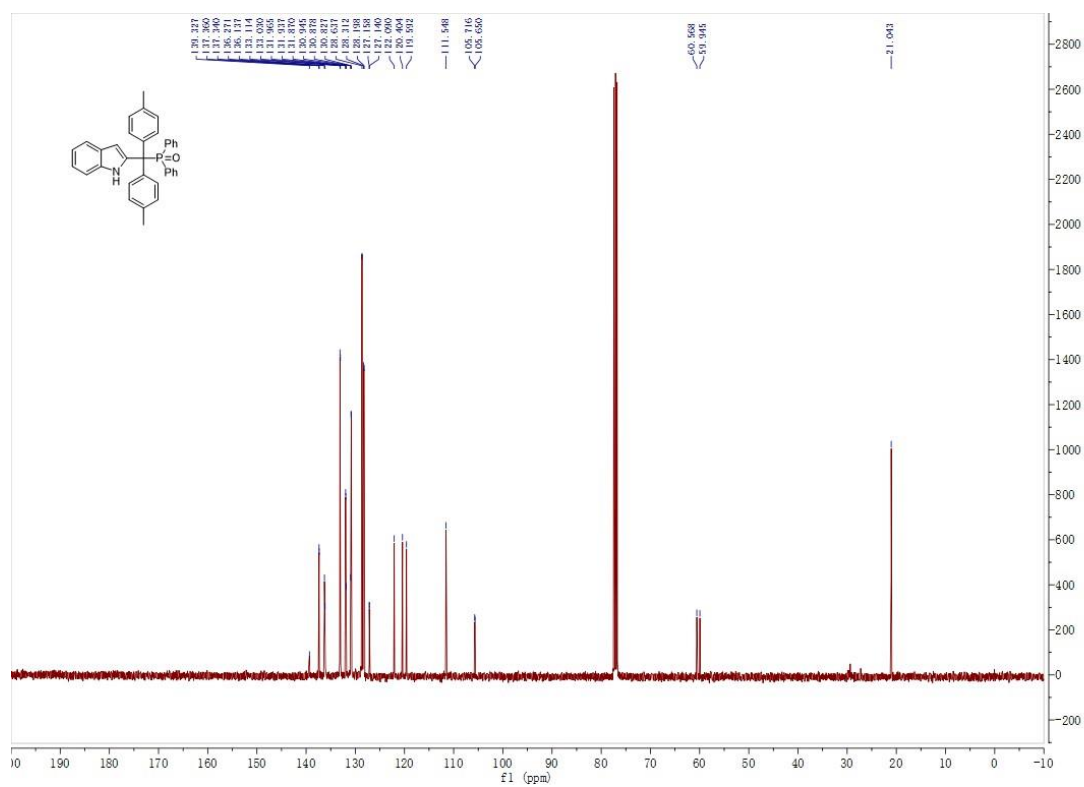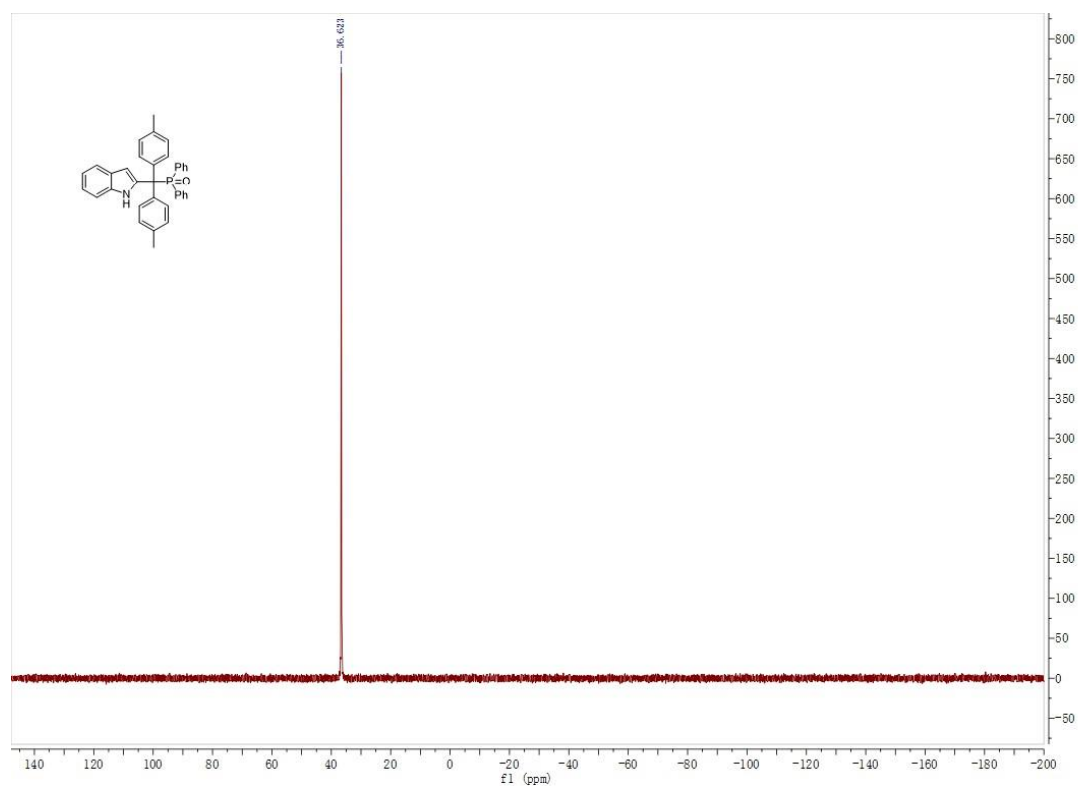

3ca



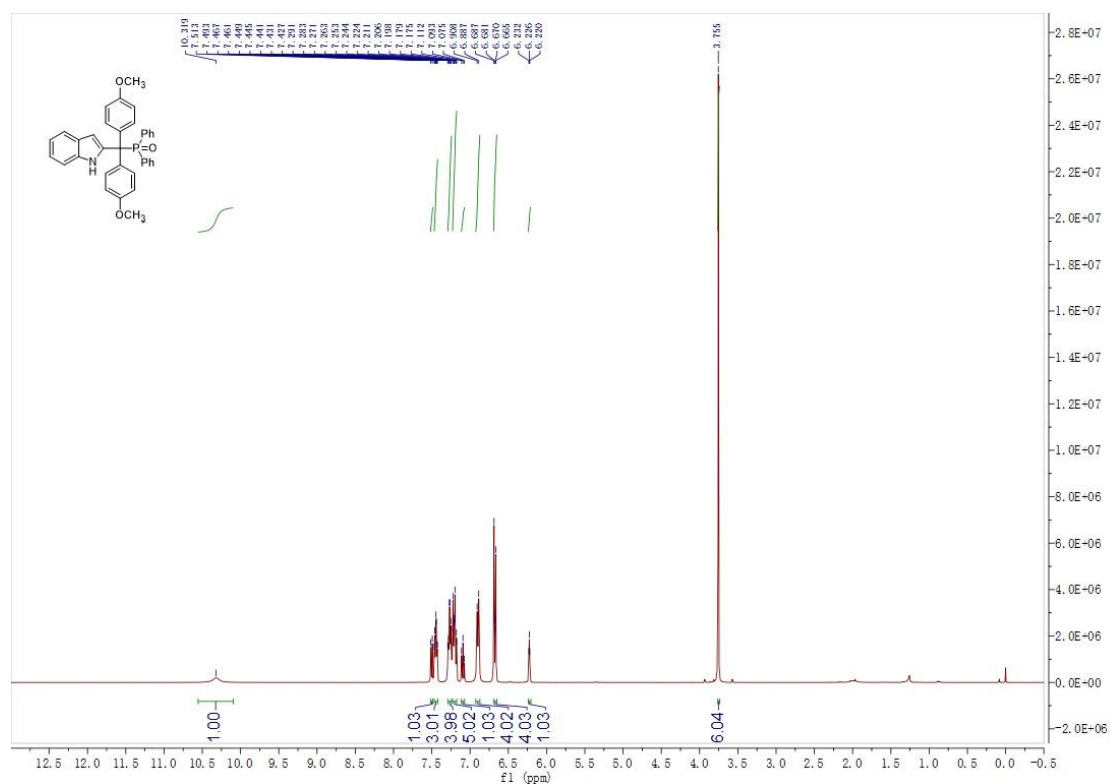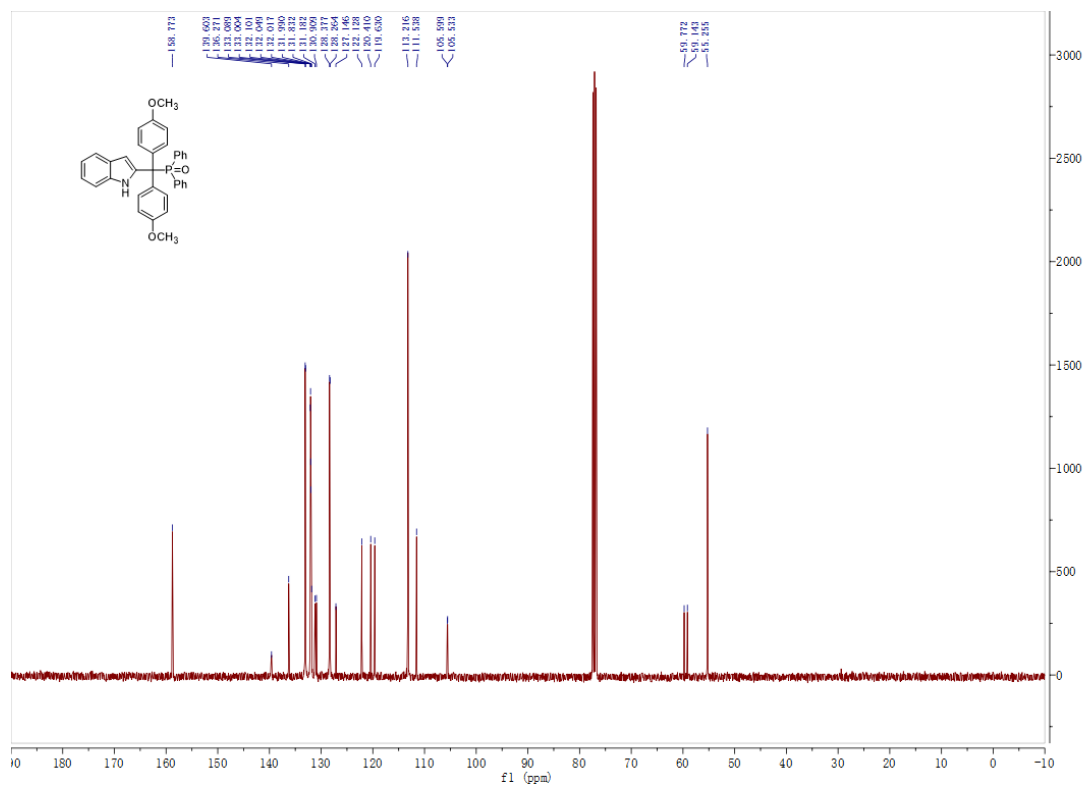

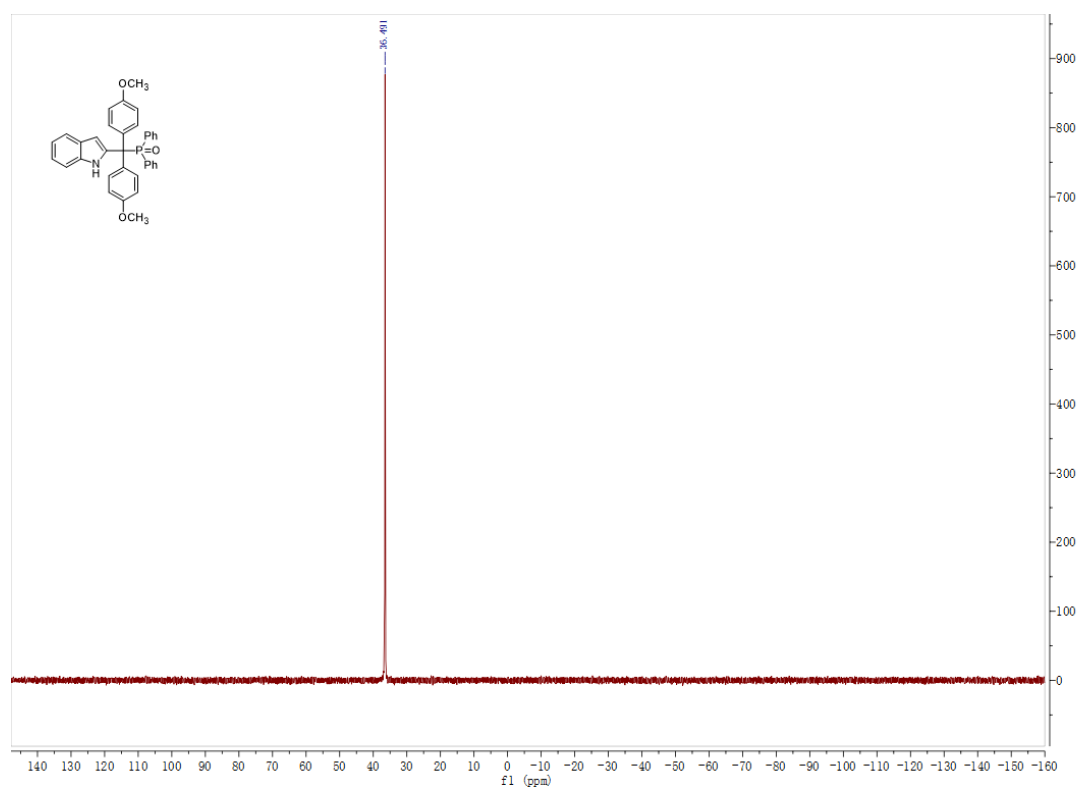

**3da**

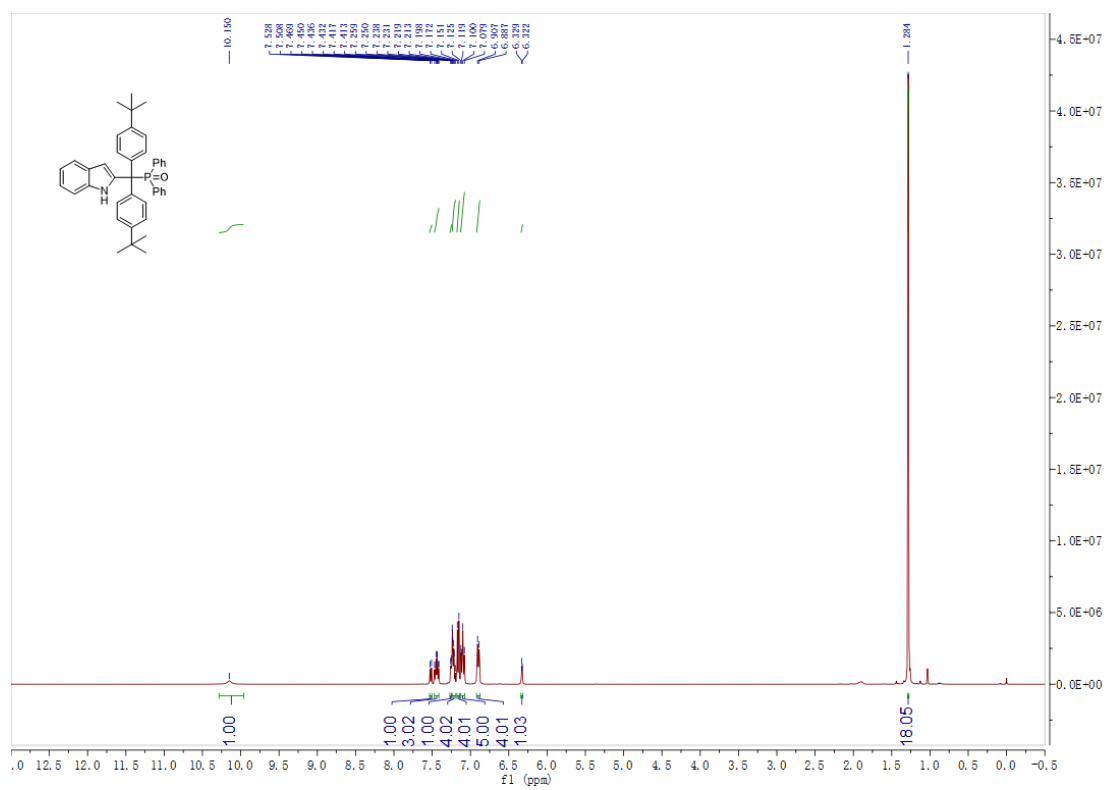

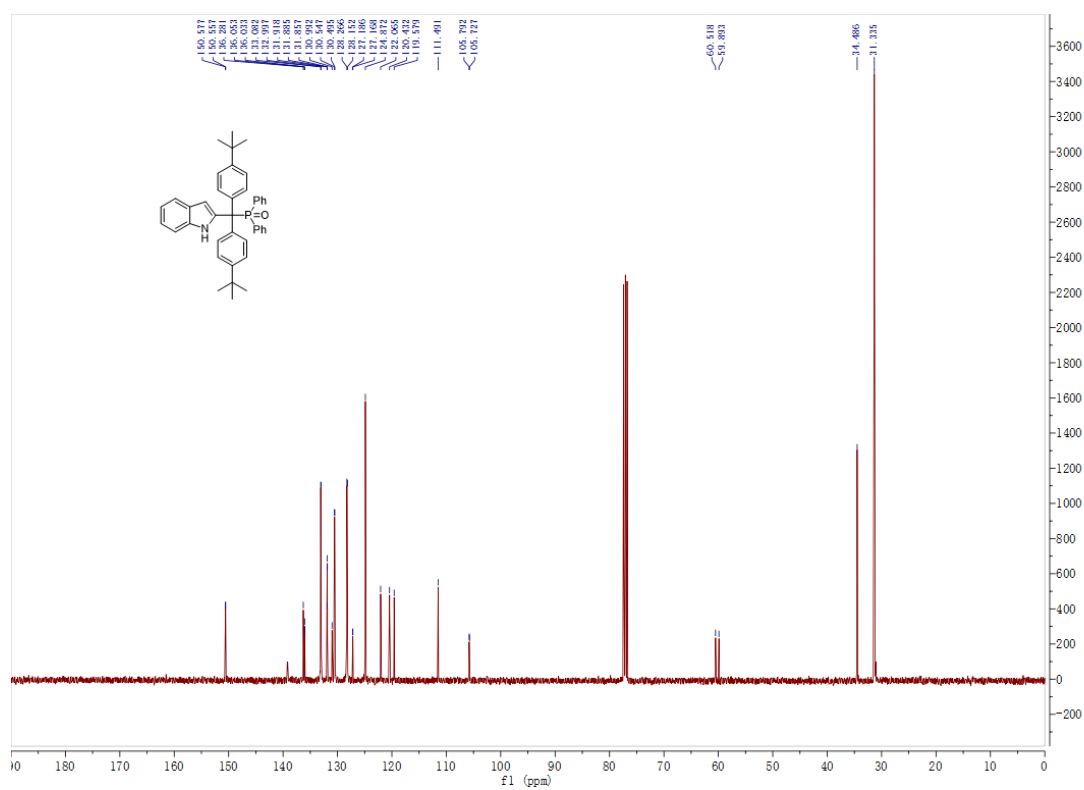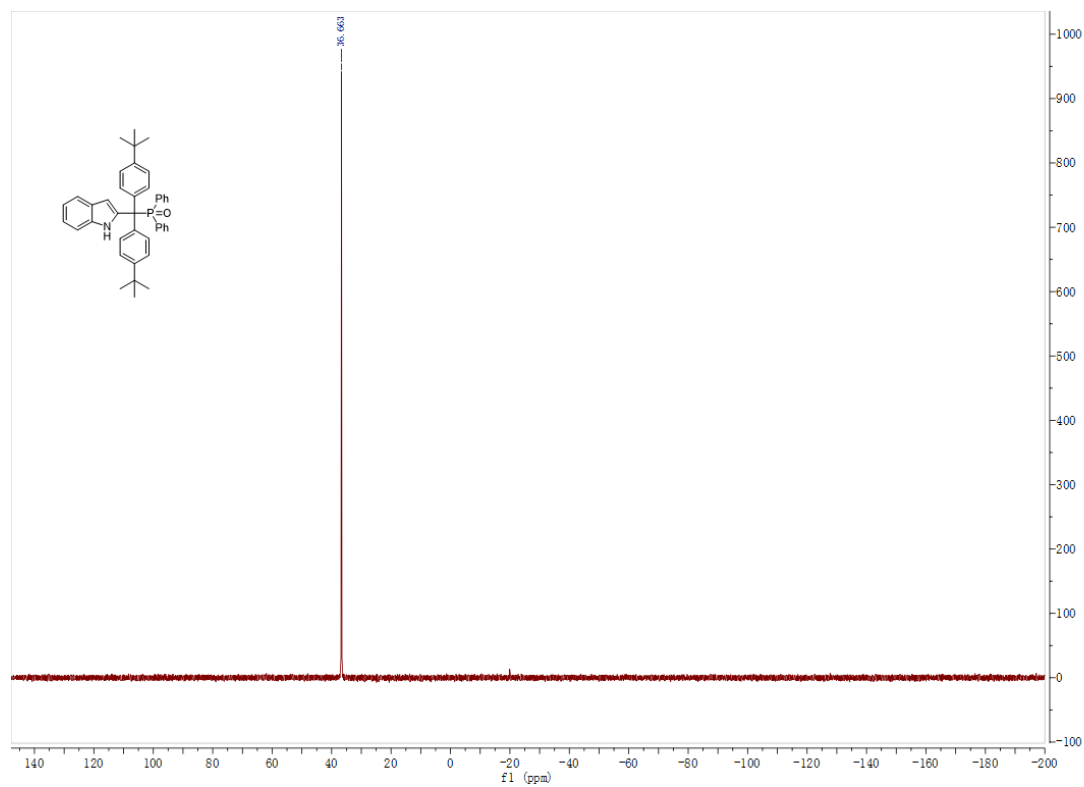

**3ea**

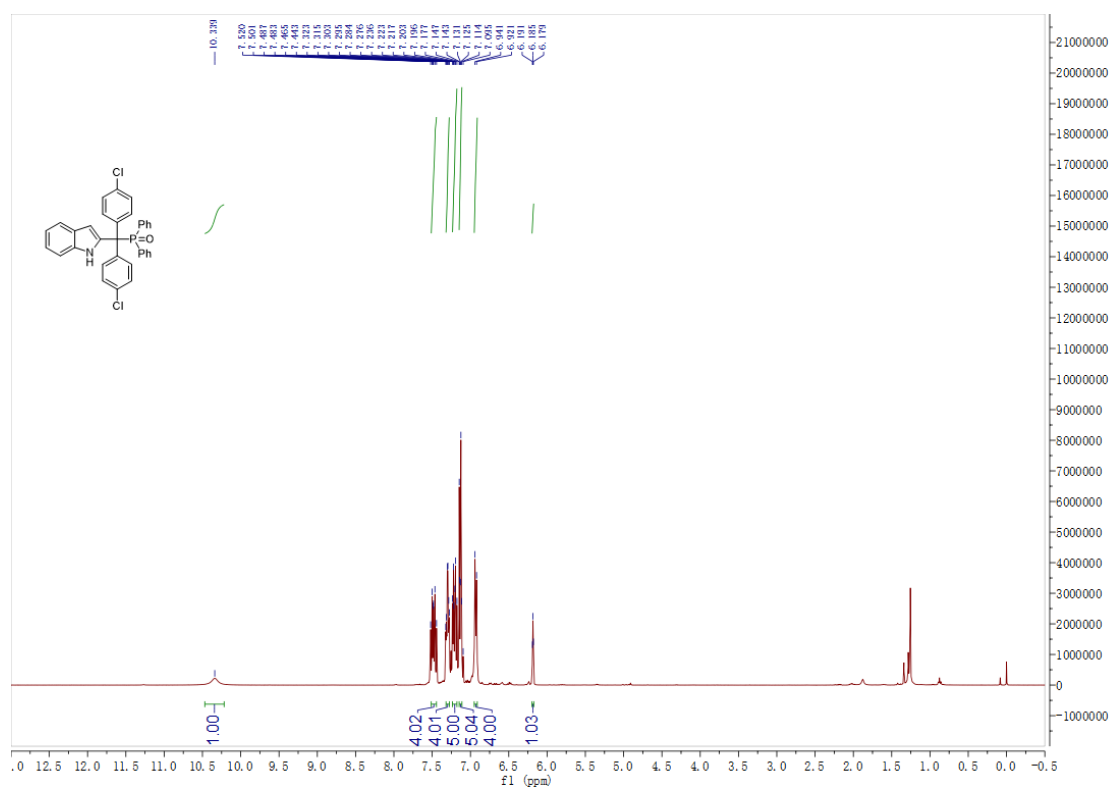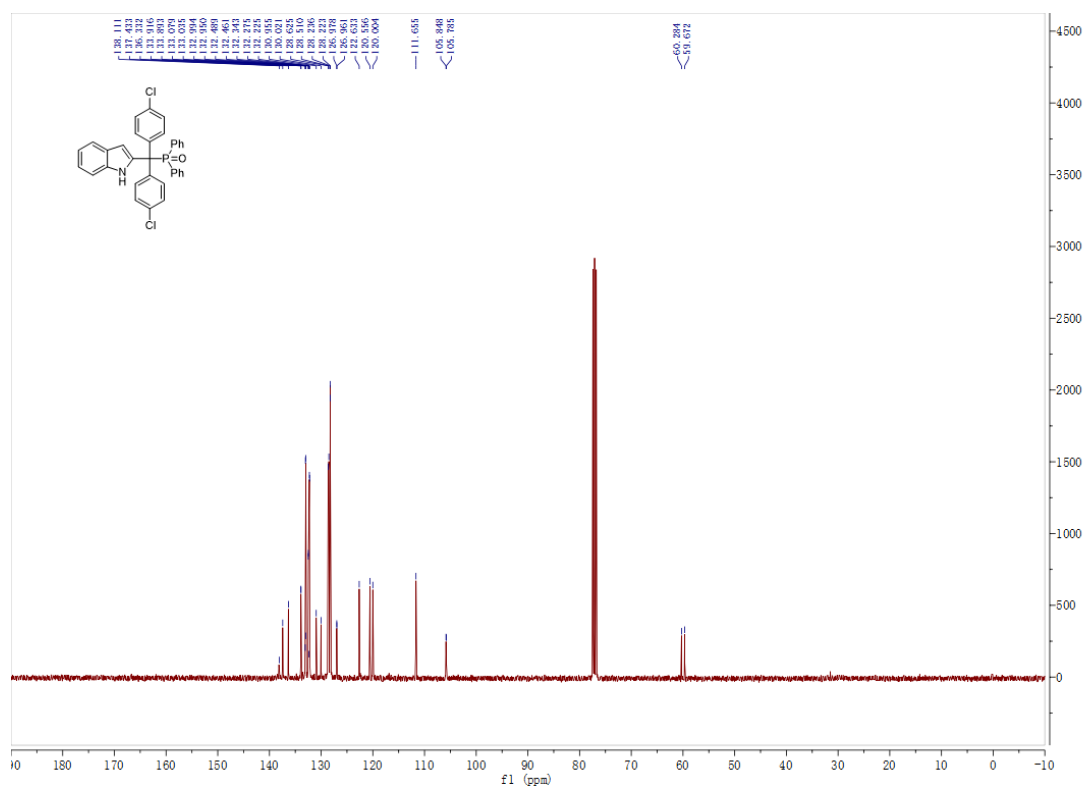

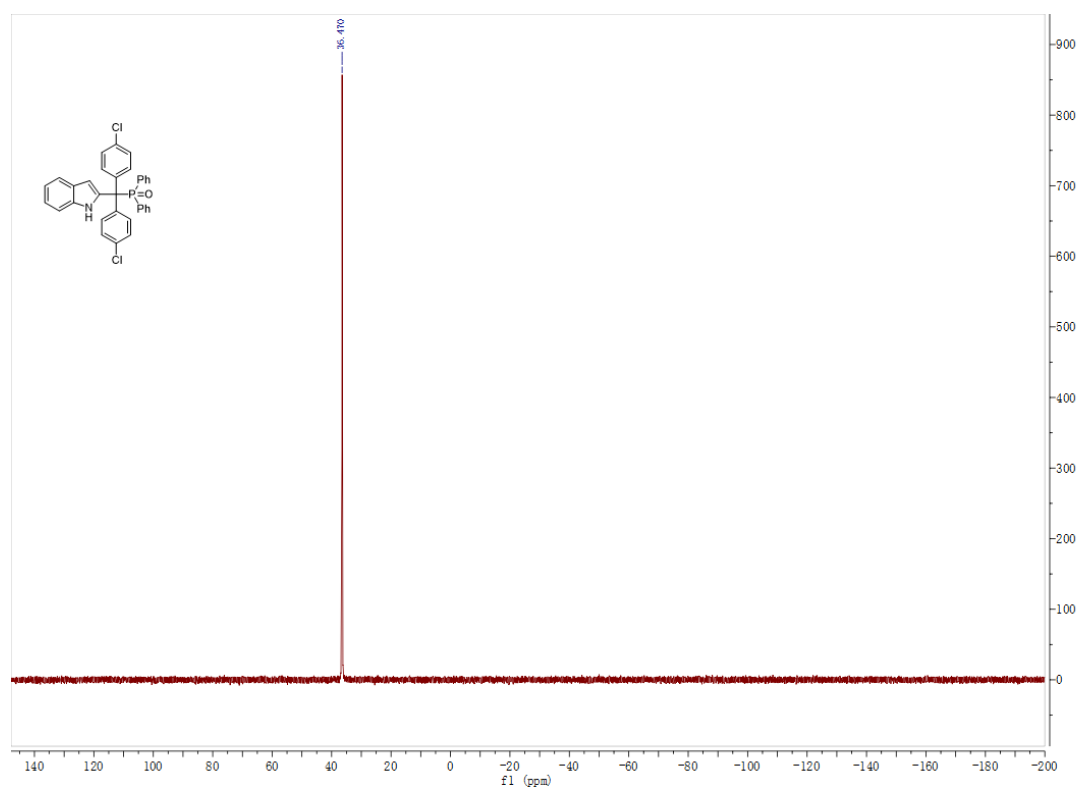

**3fa**

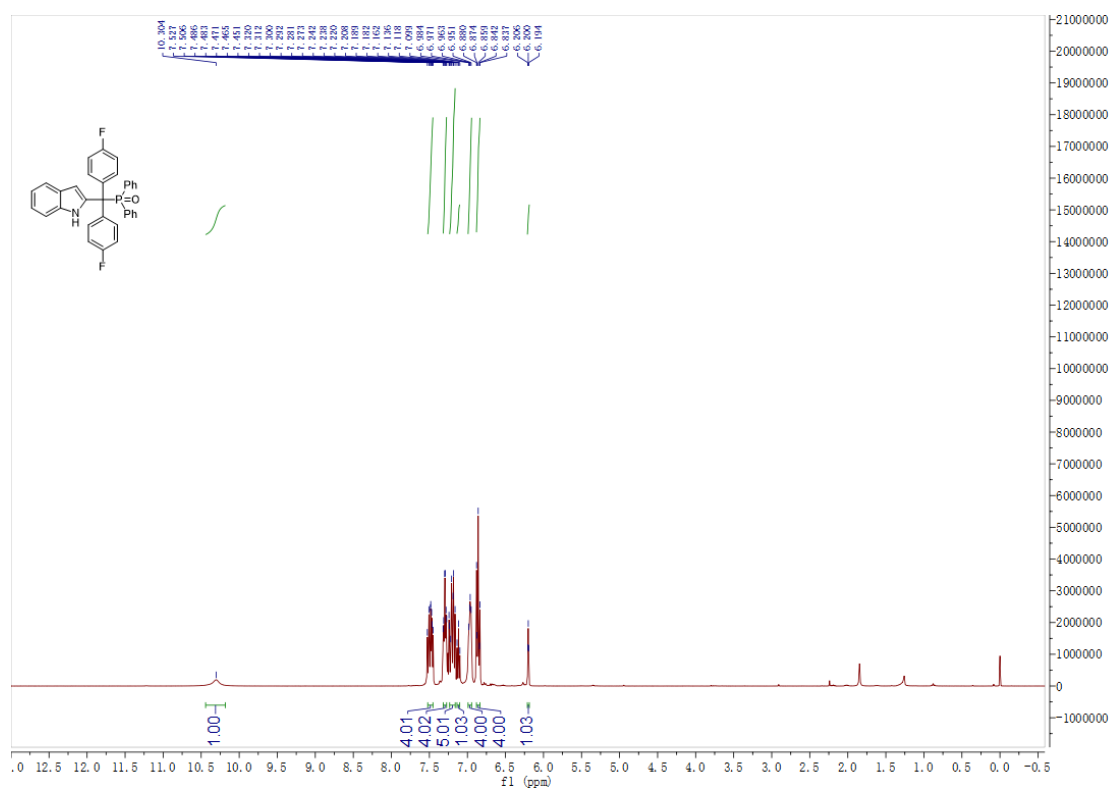

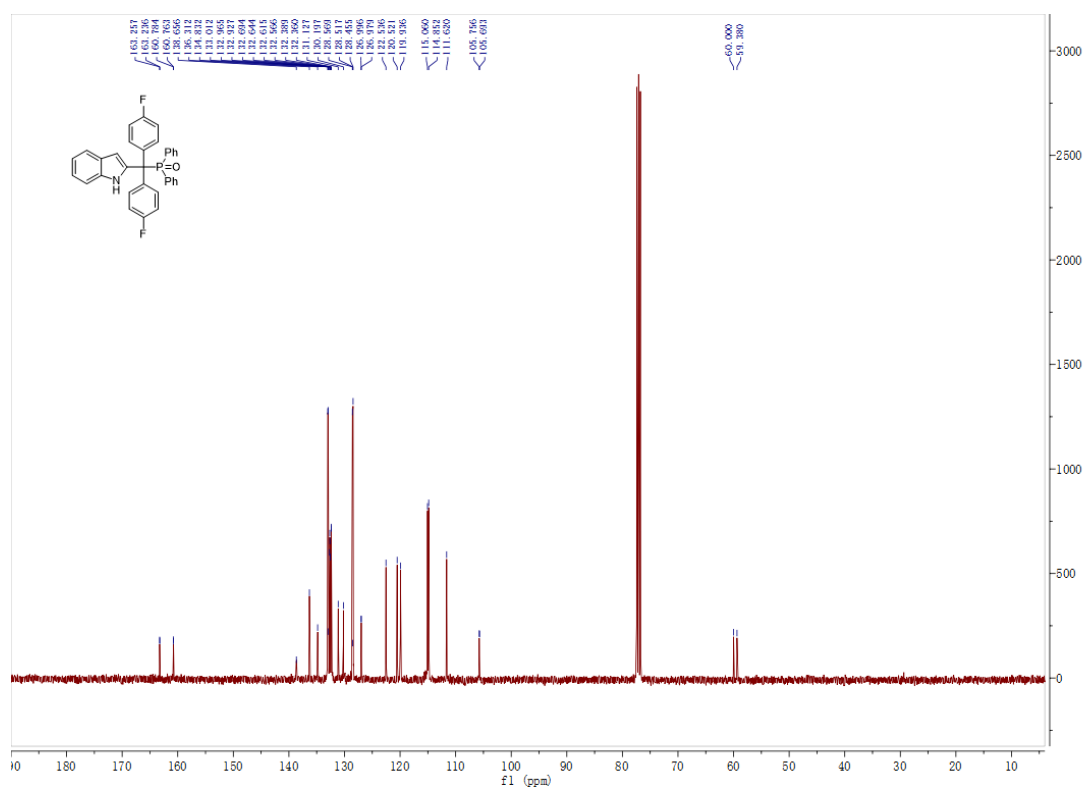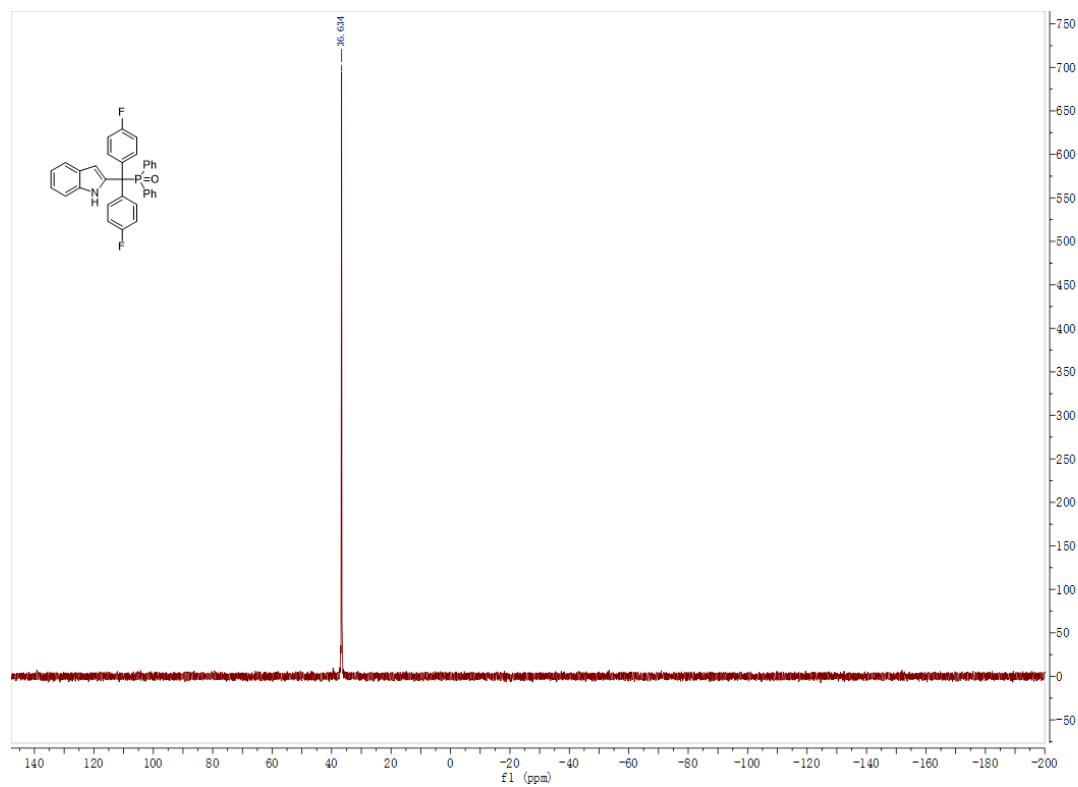

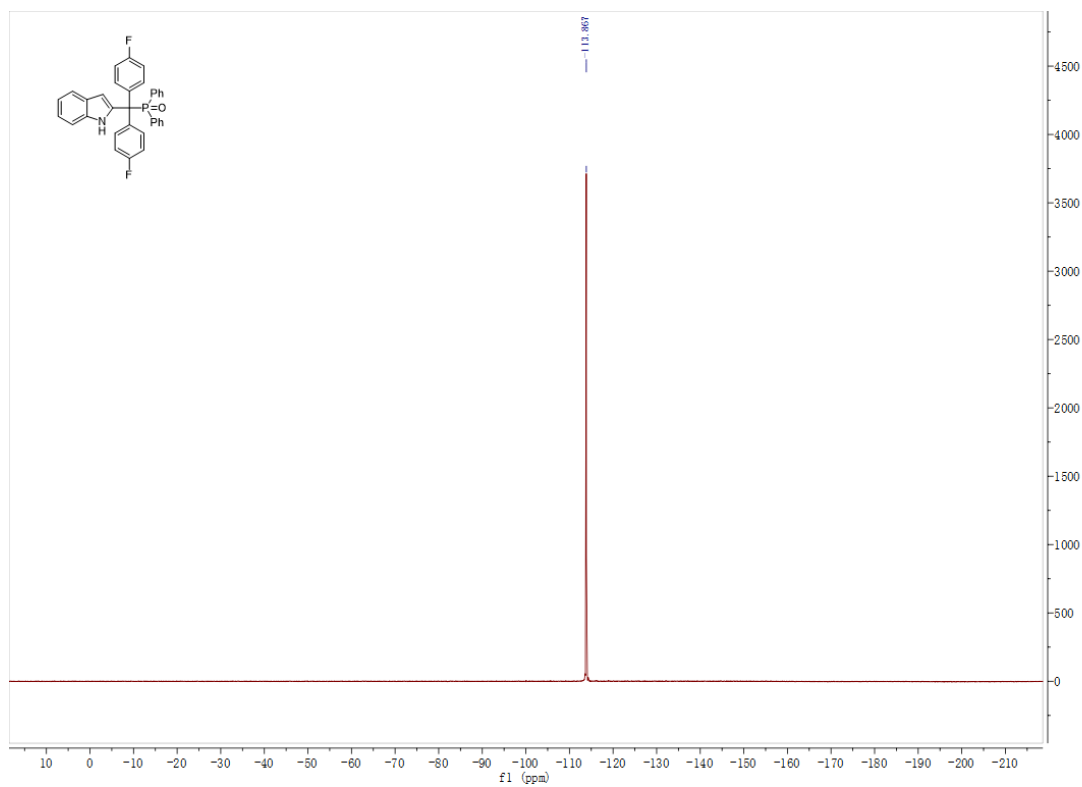

**3ha**

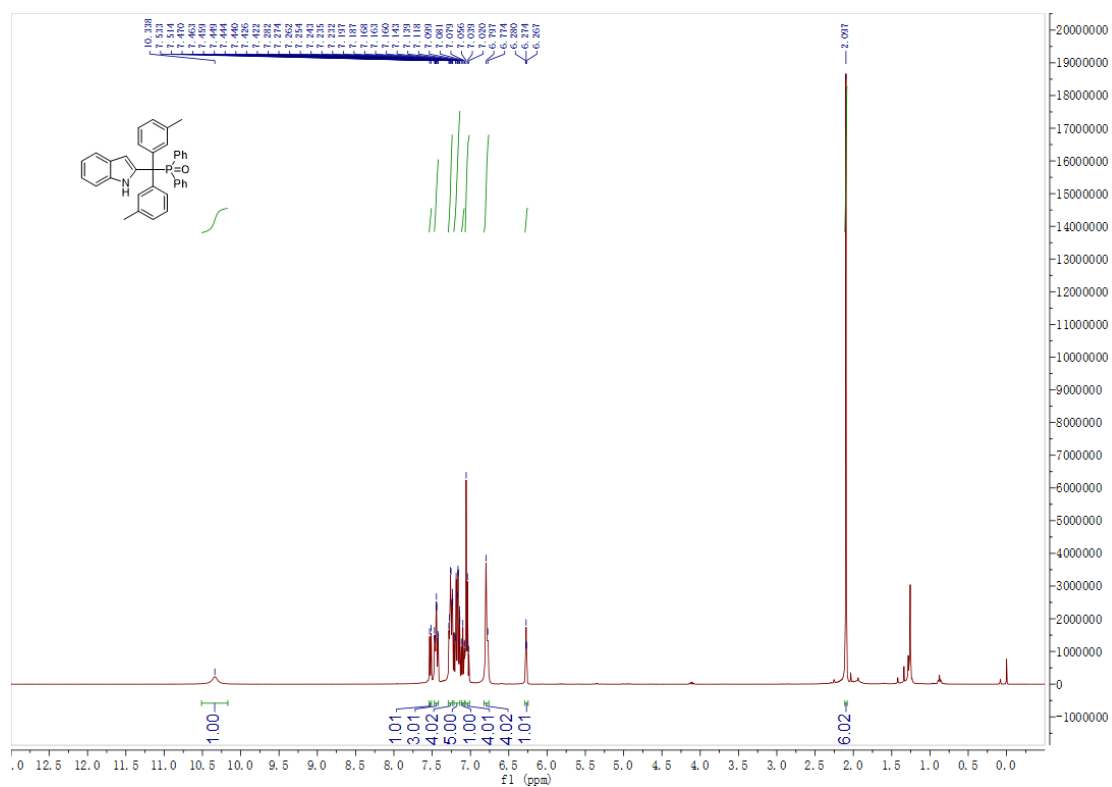

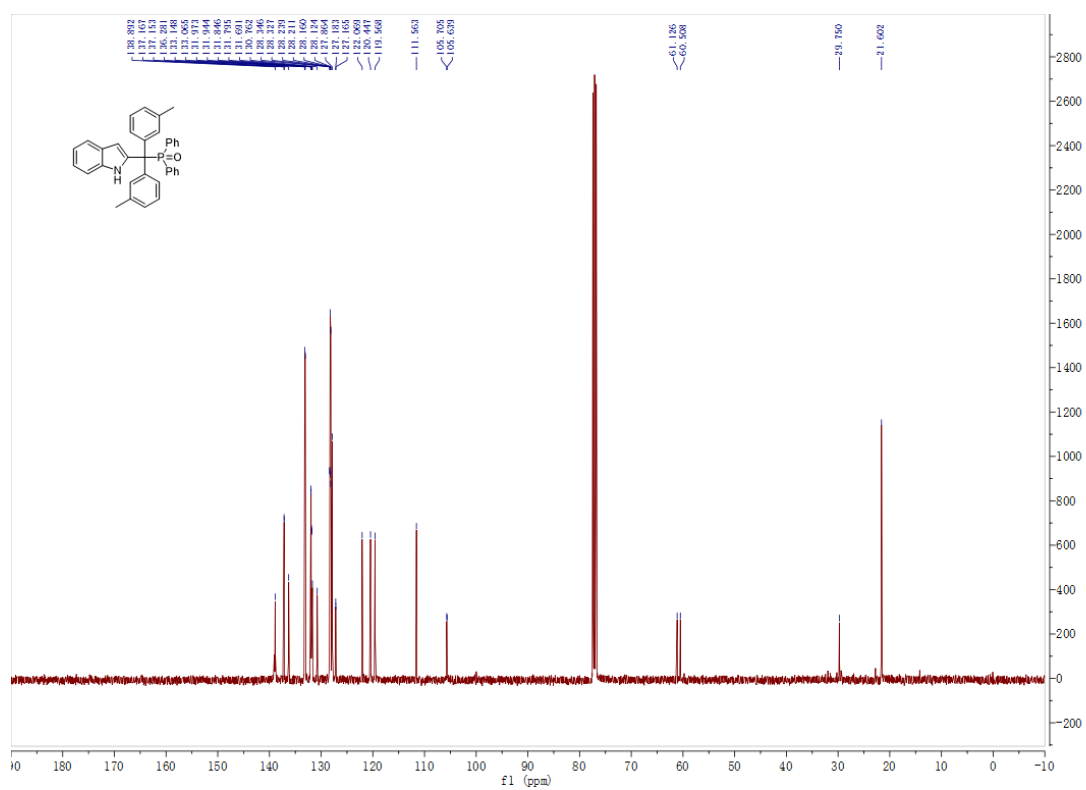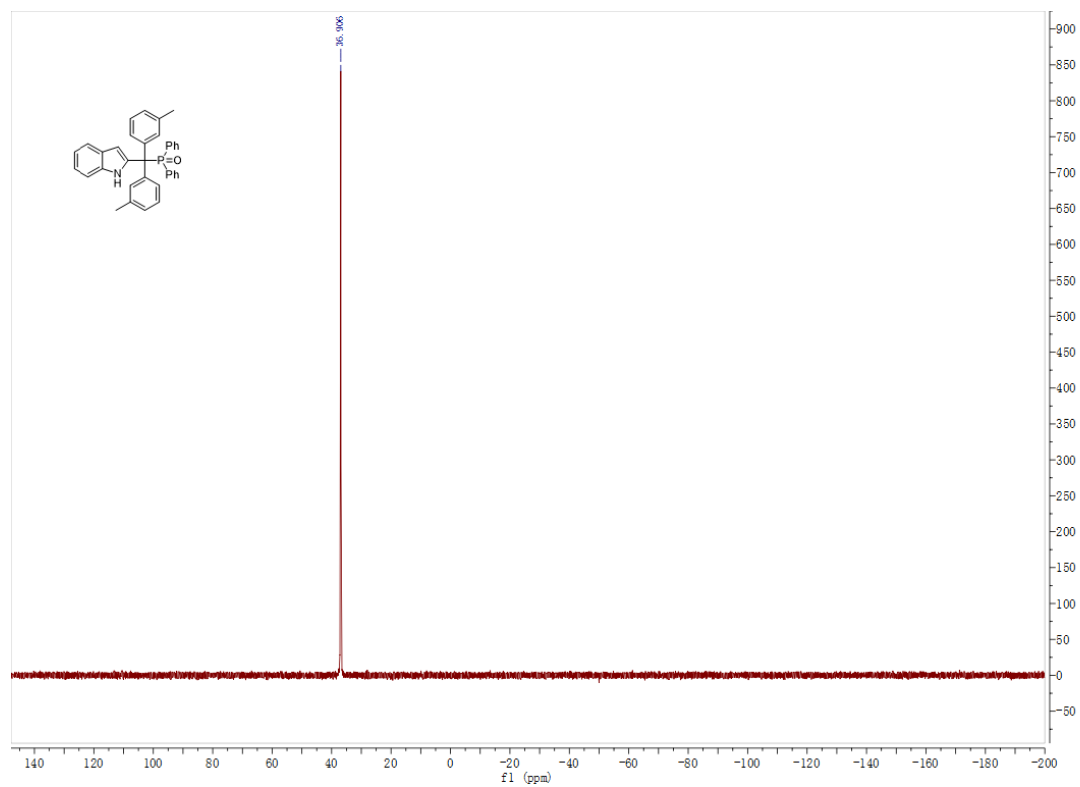

**3ia**





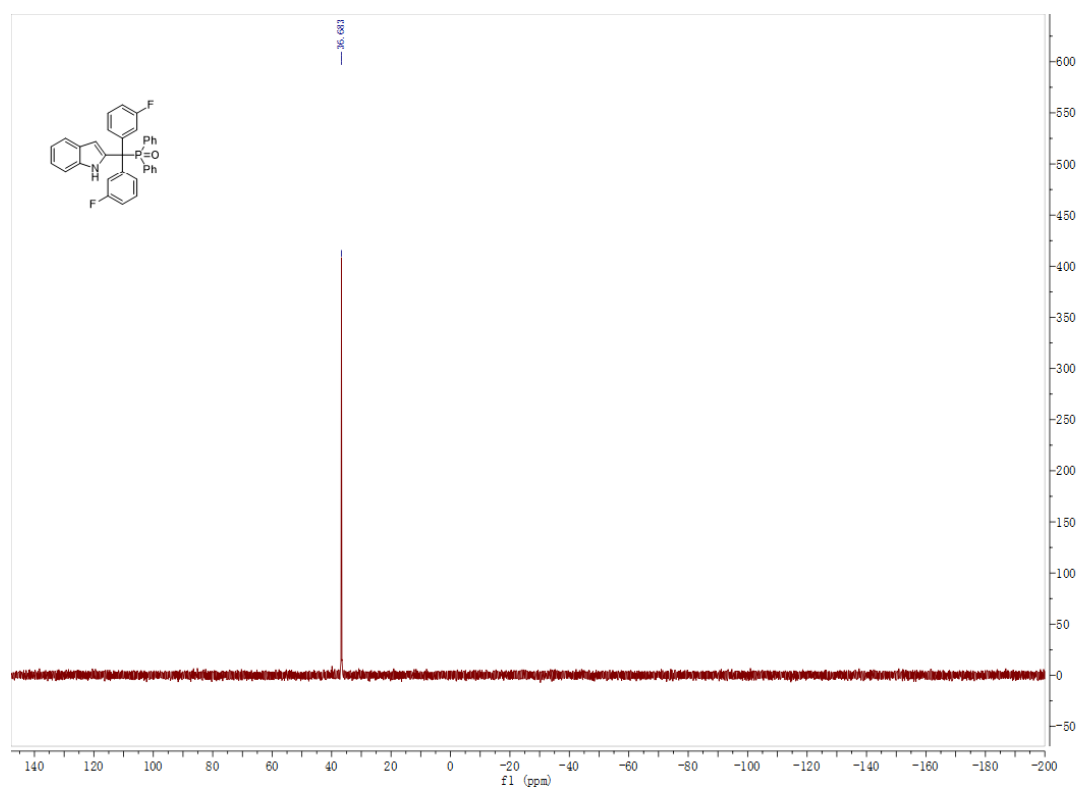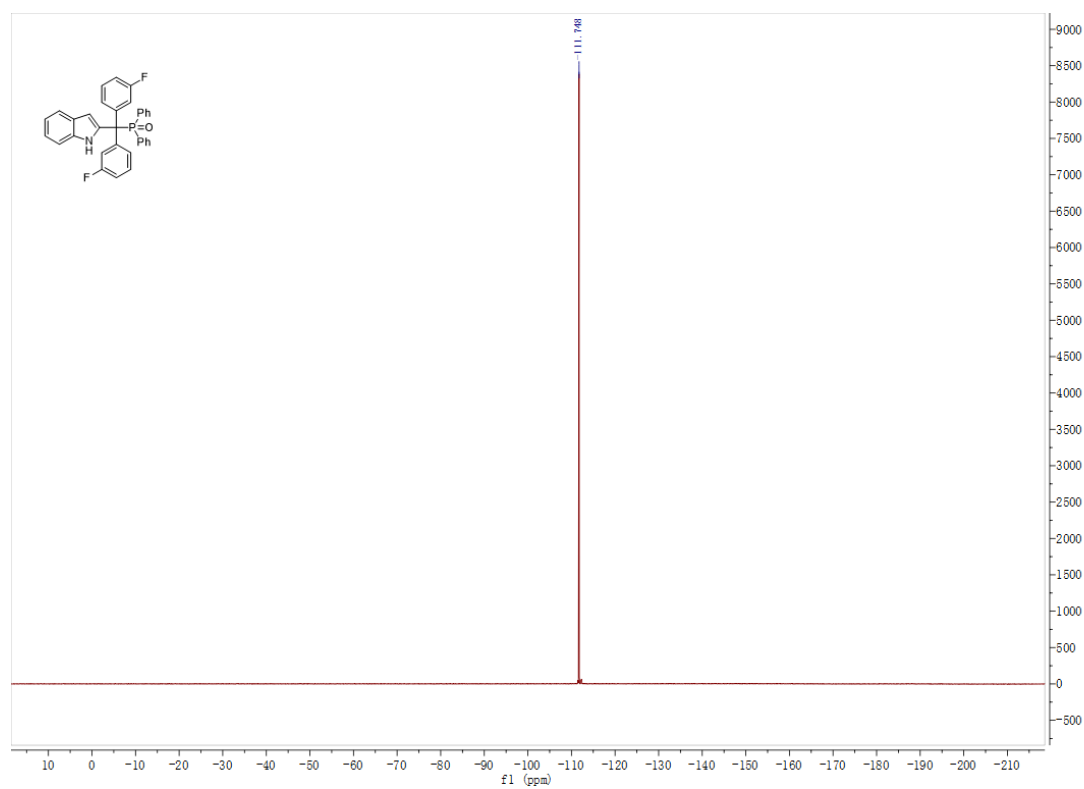

**3ja**

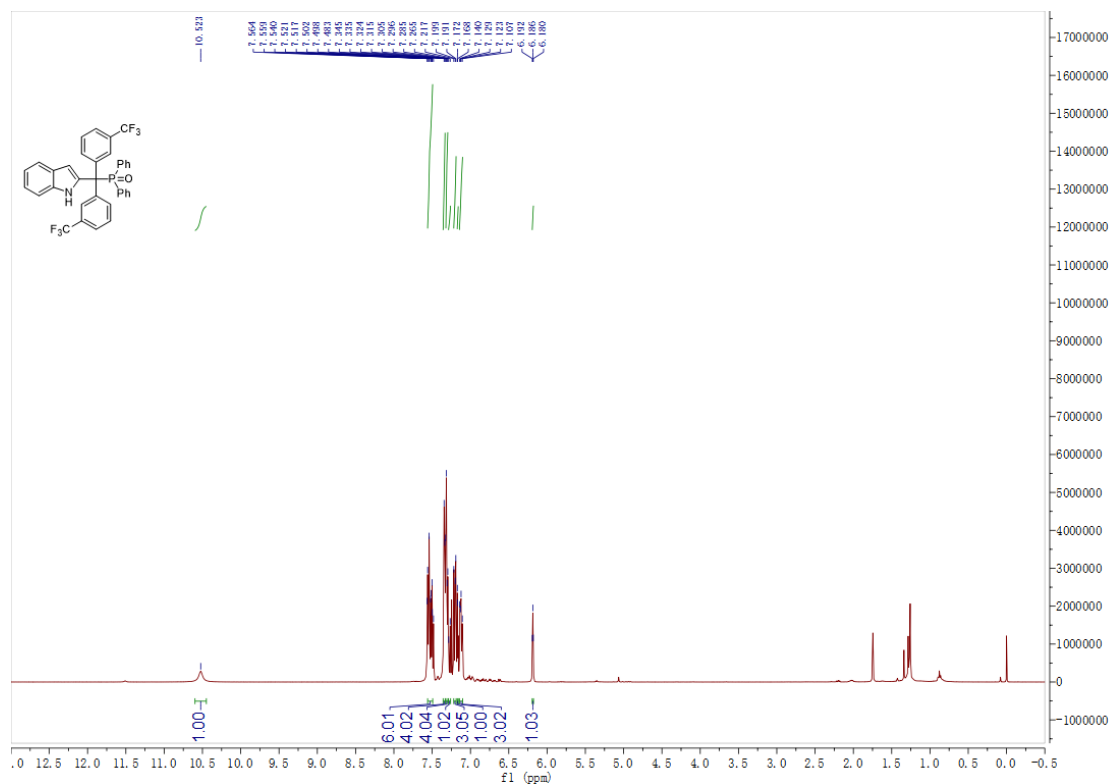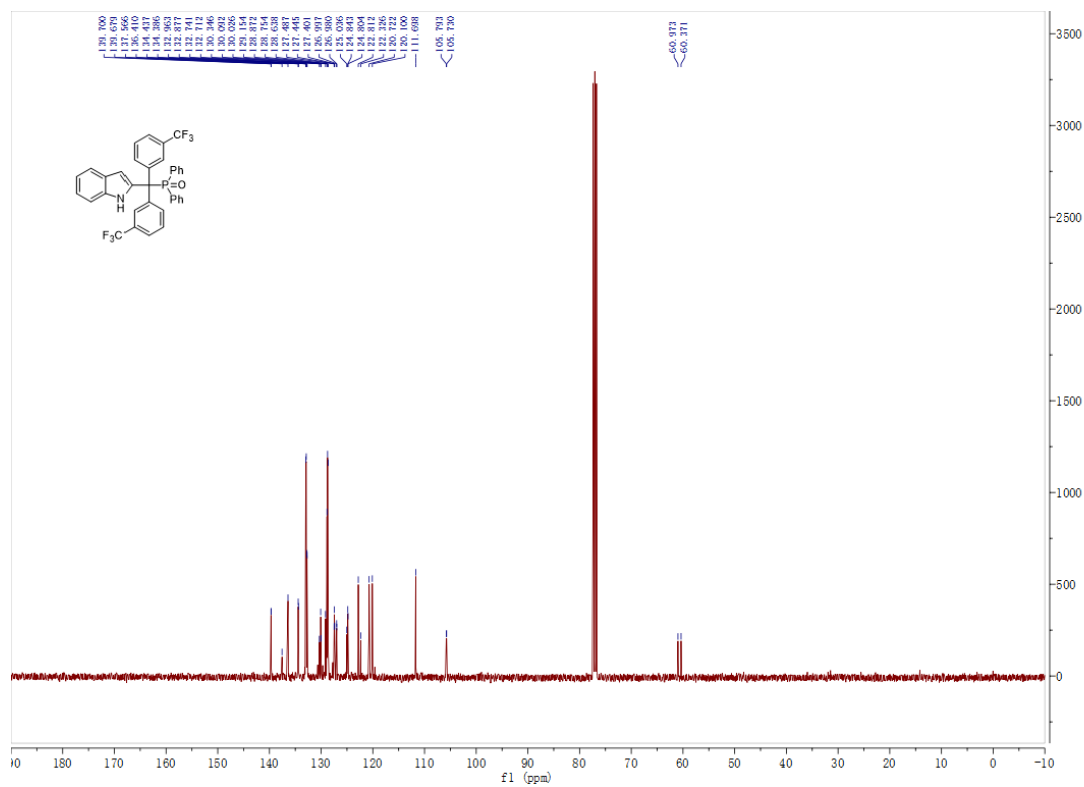

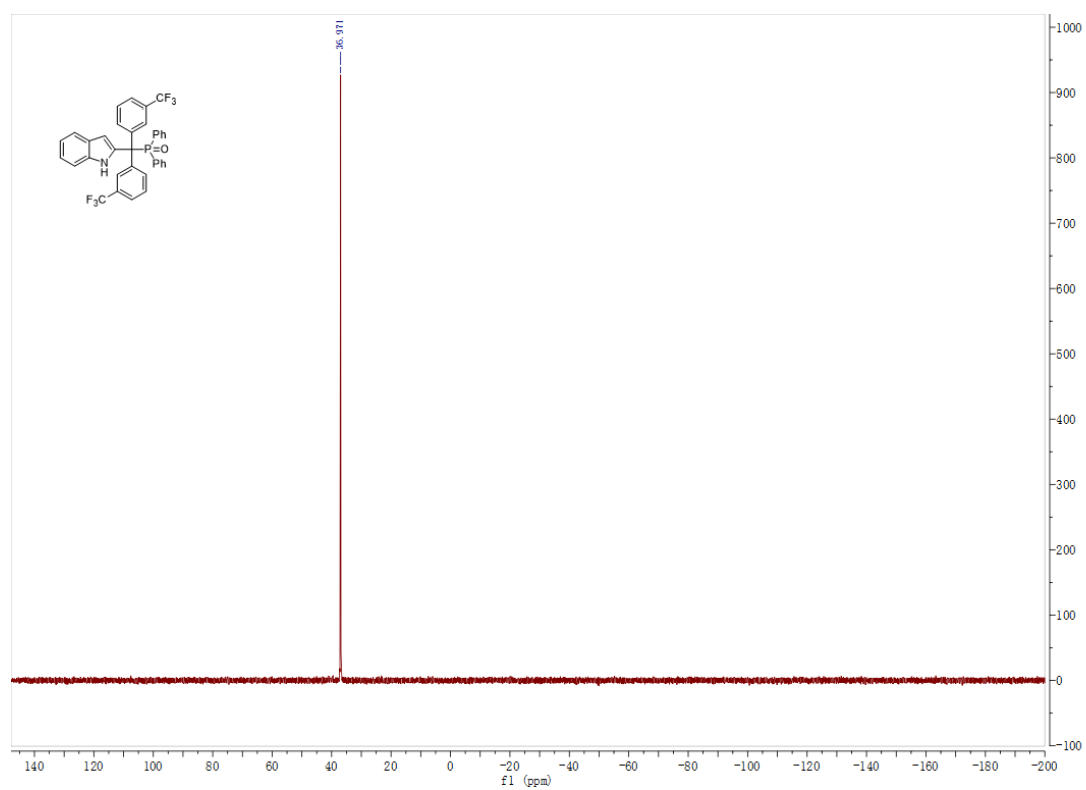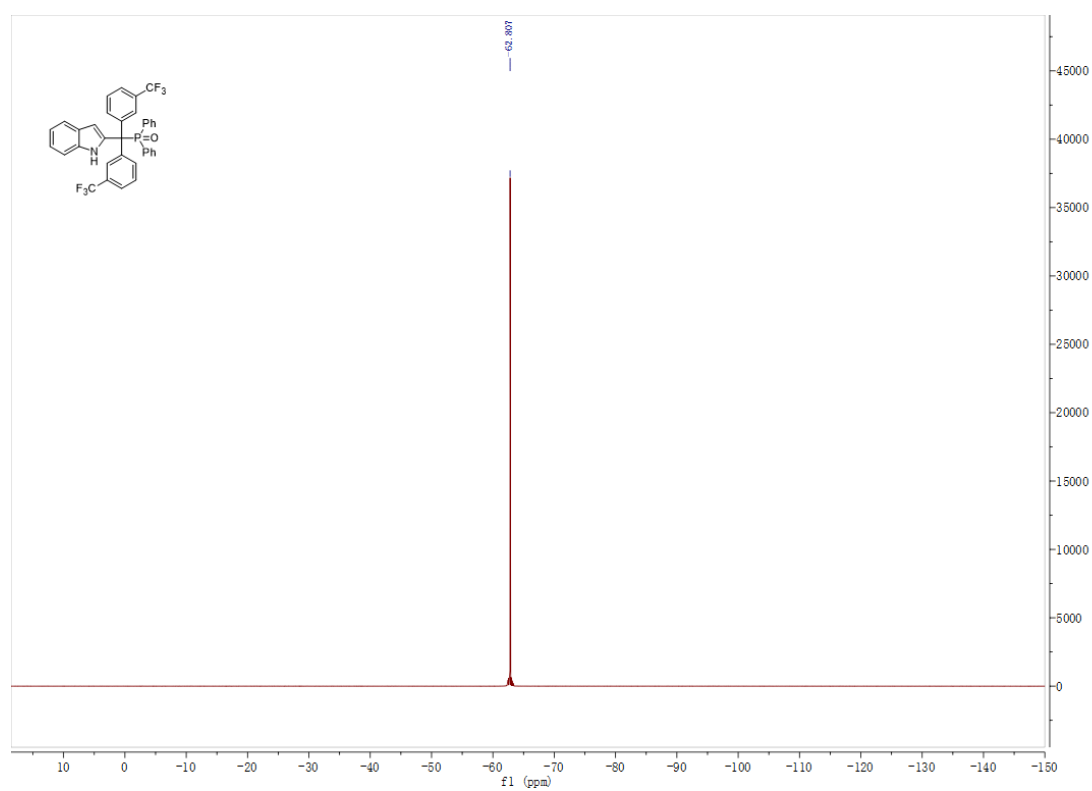

**3ka**

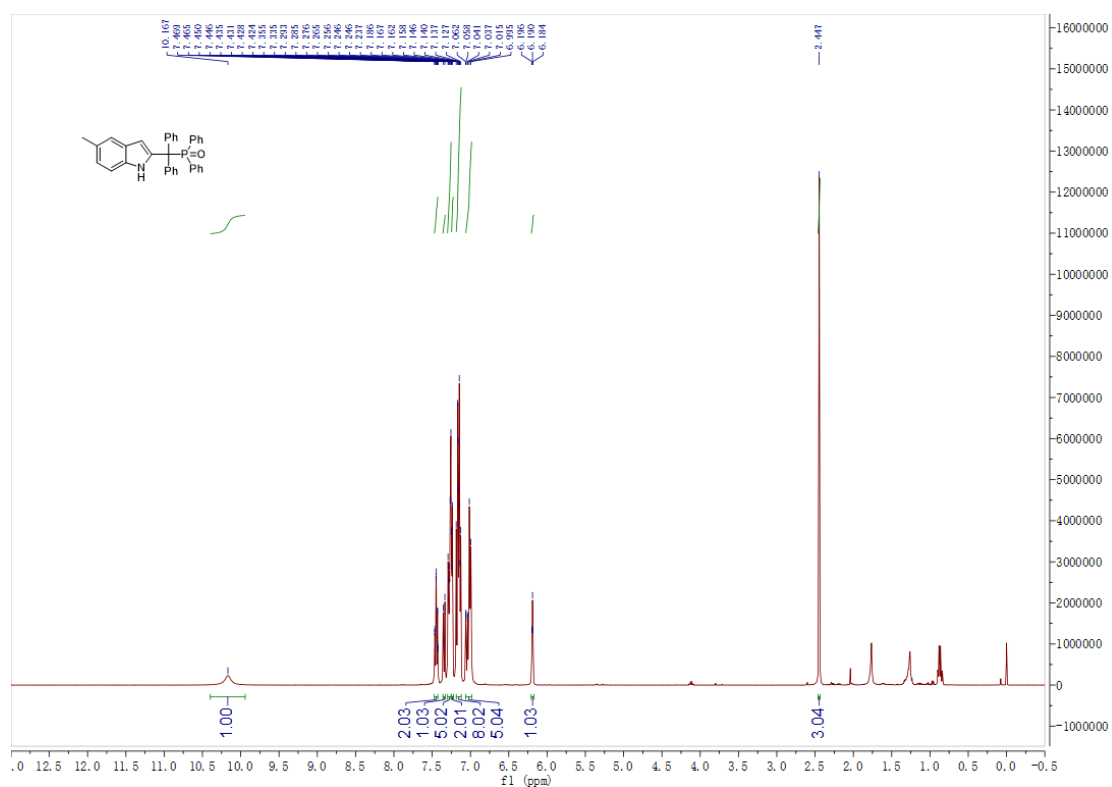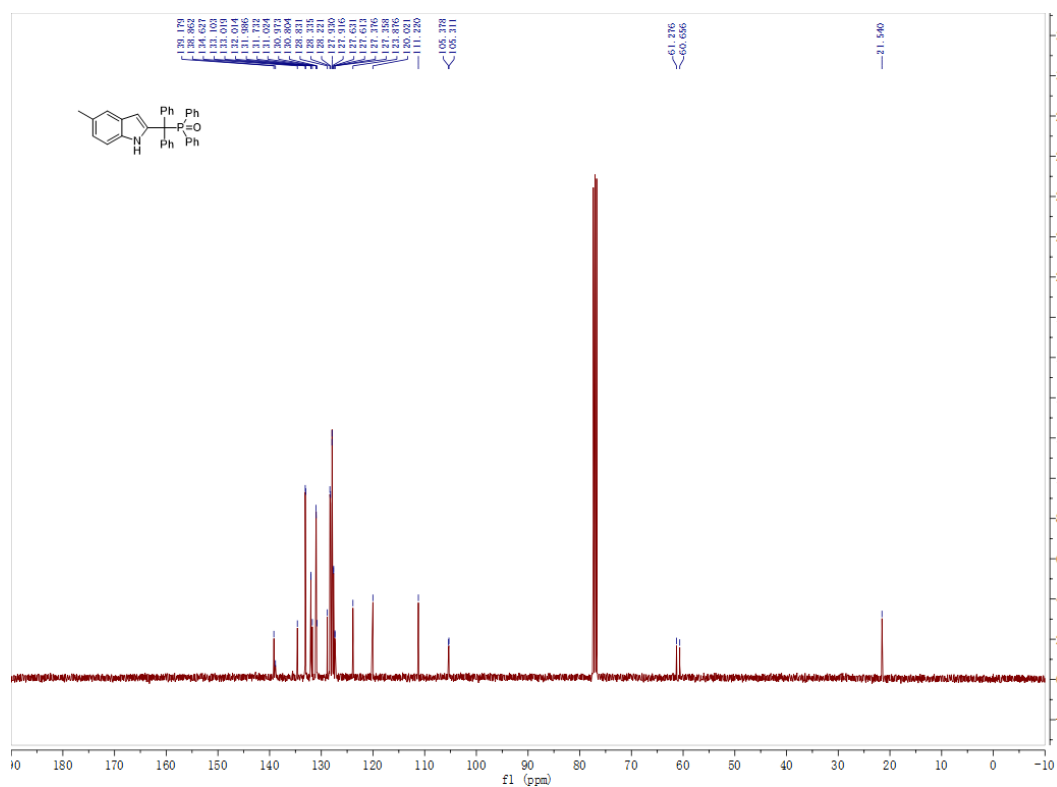

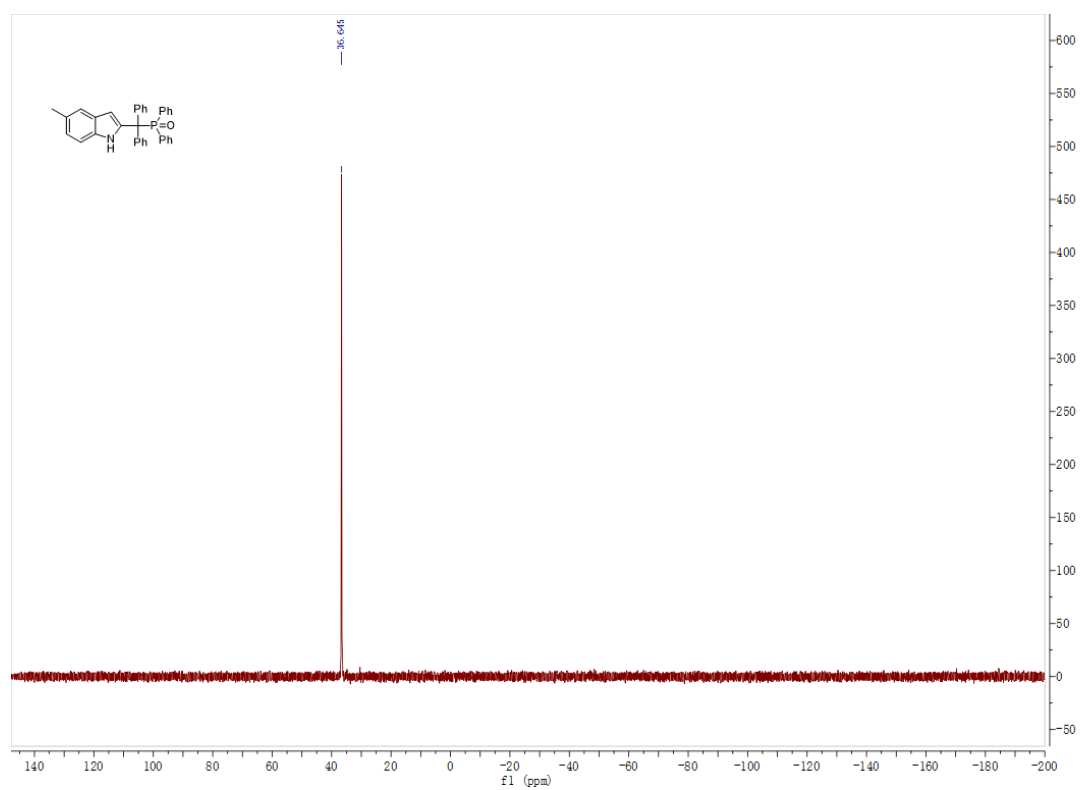

**3la**

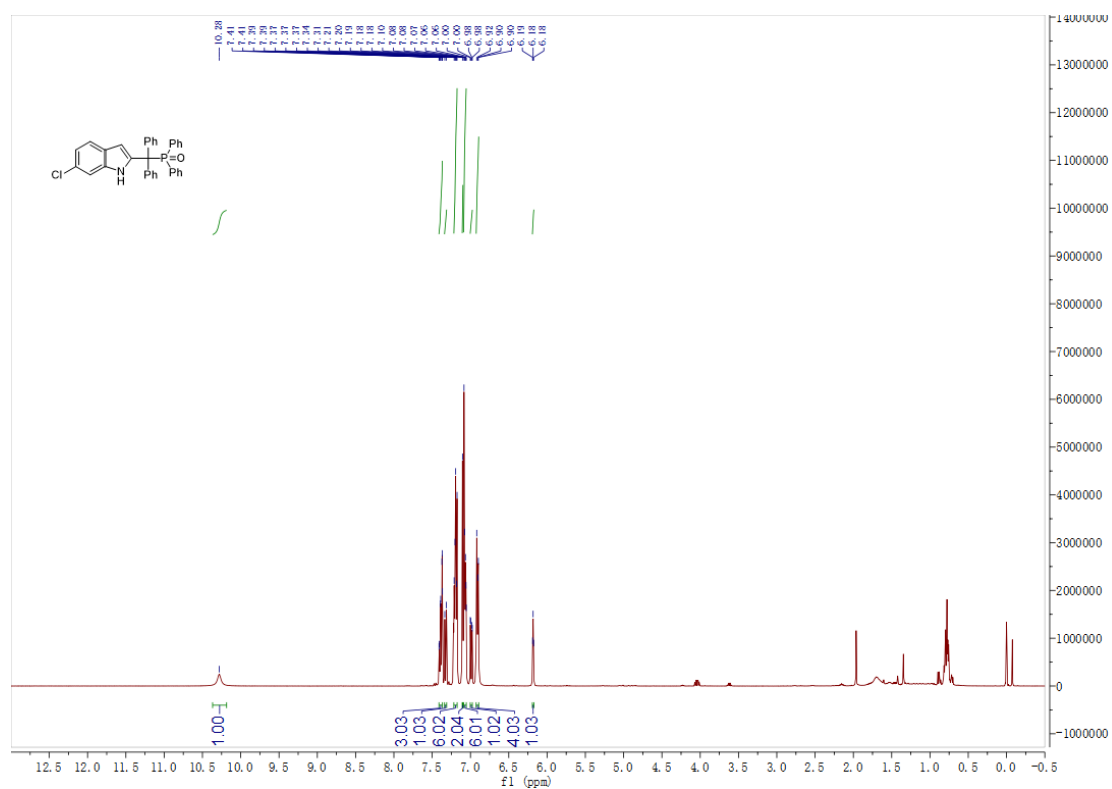

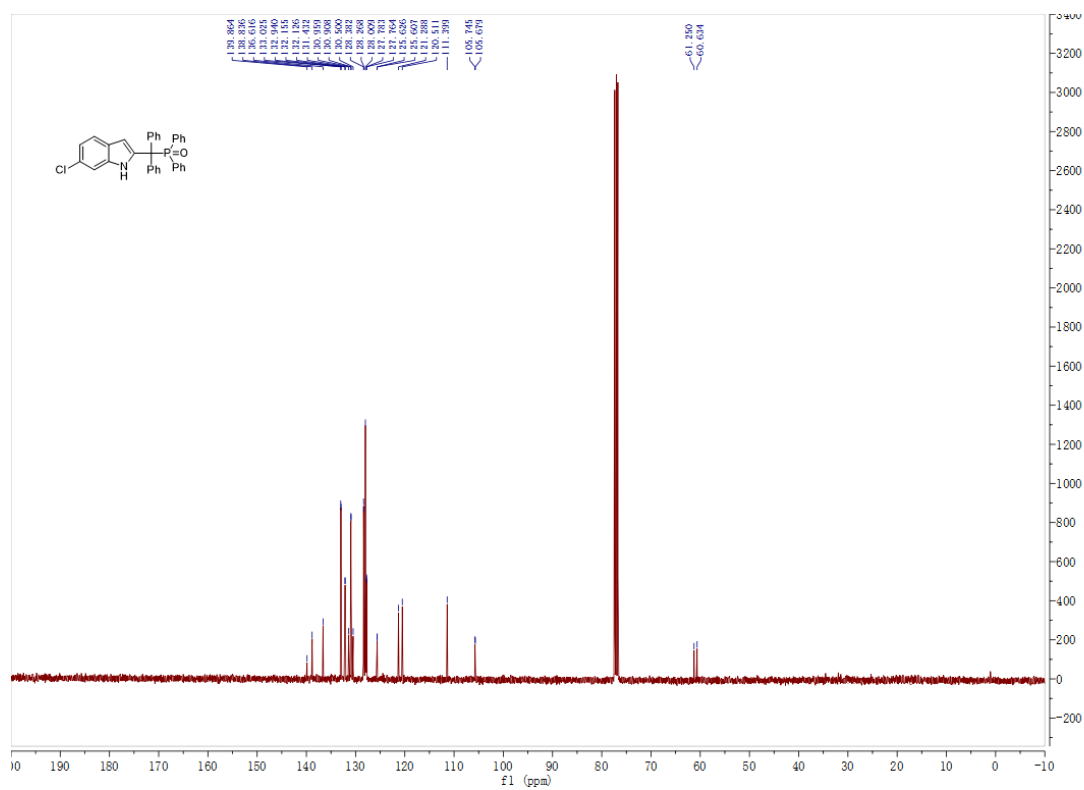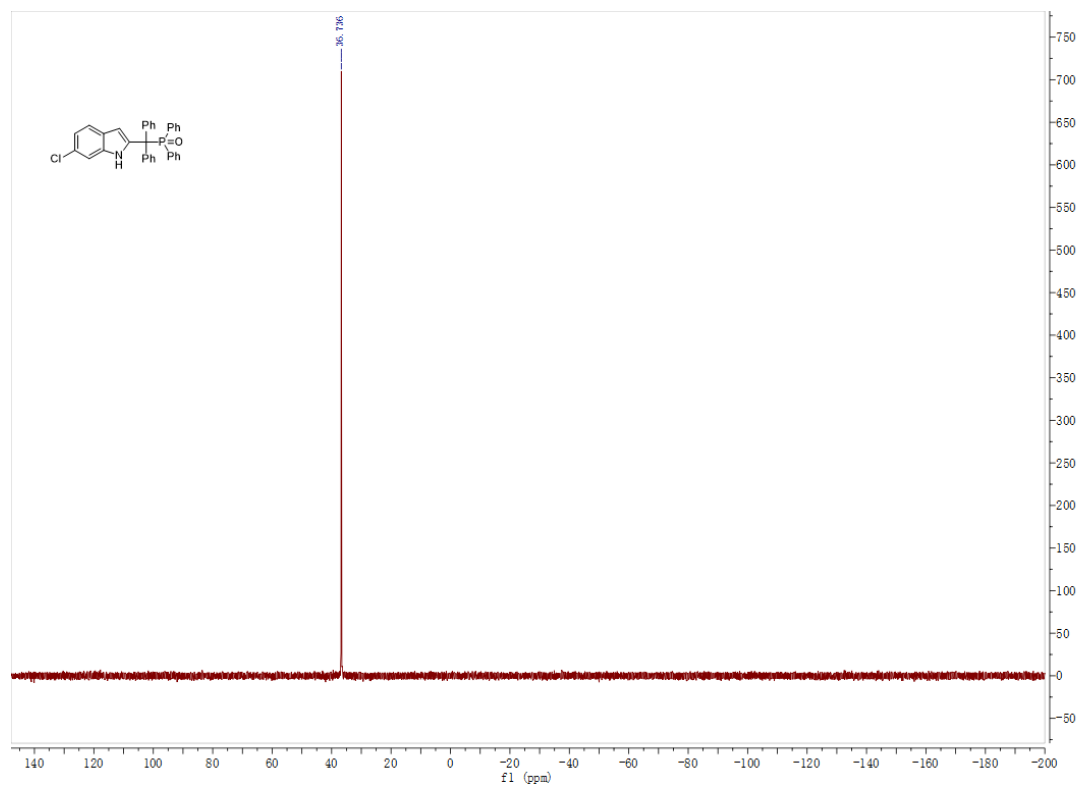

**3ma**

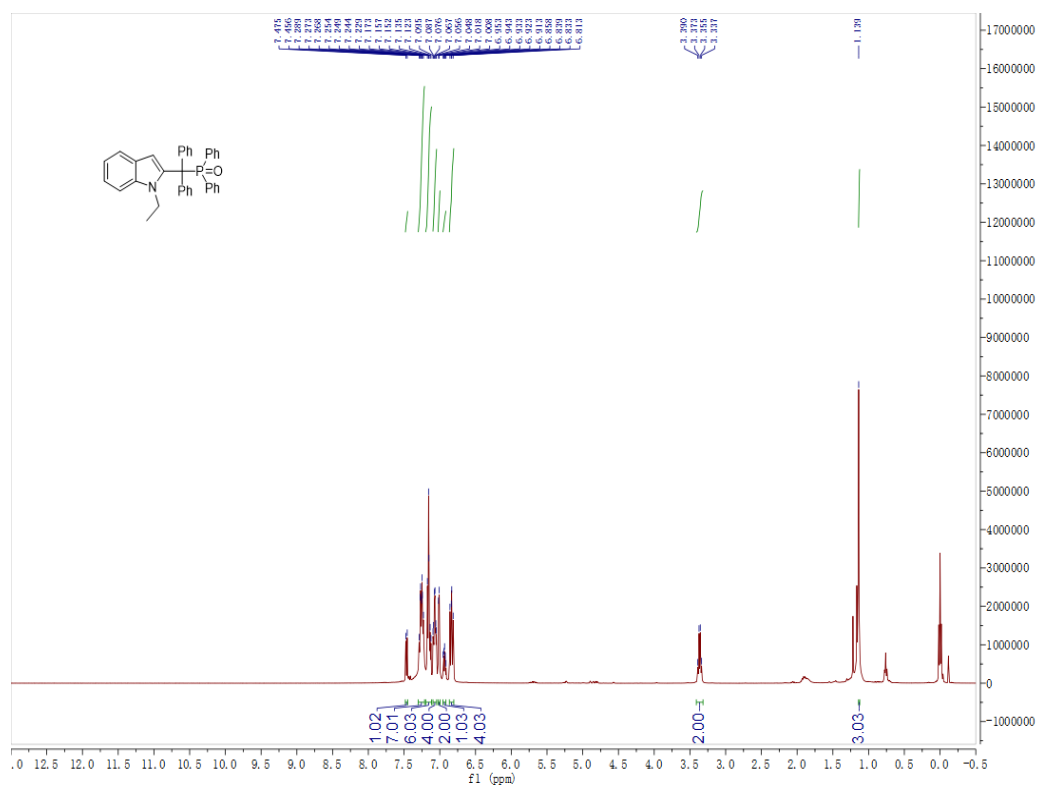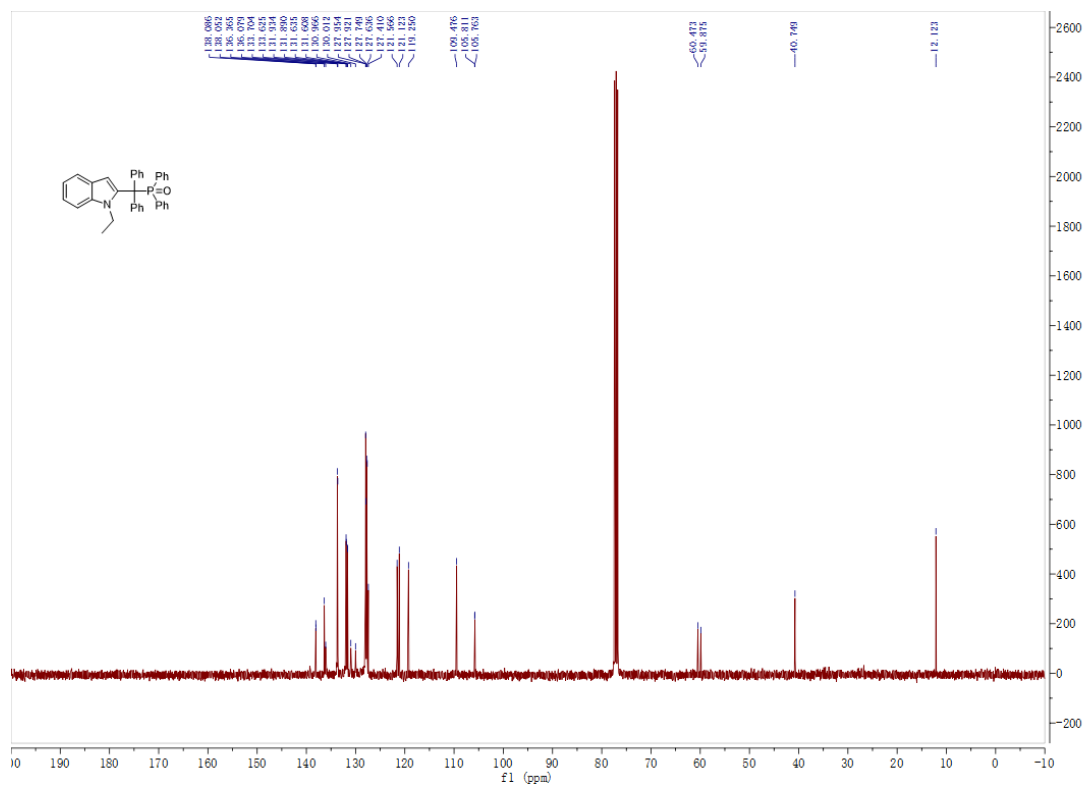



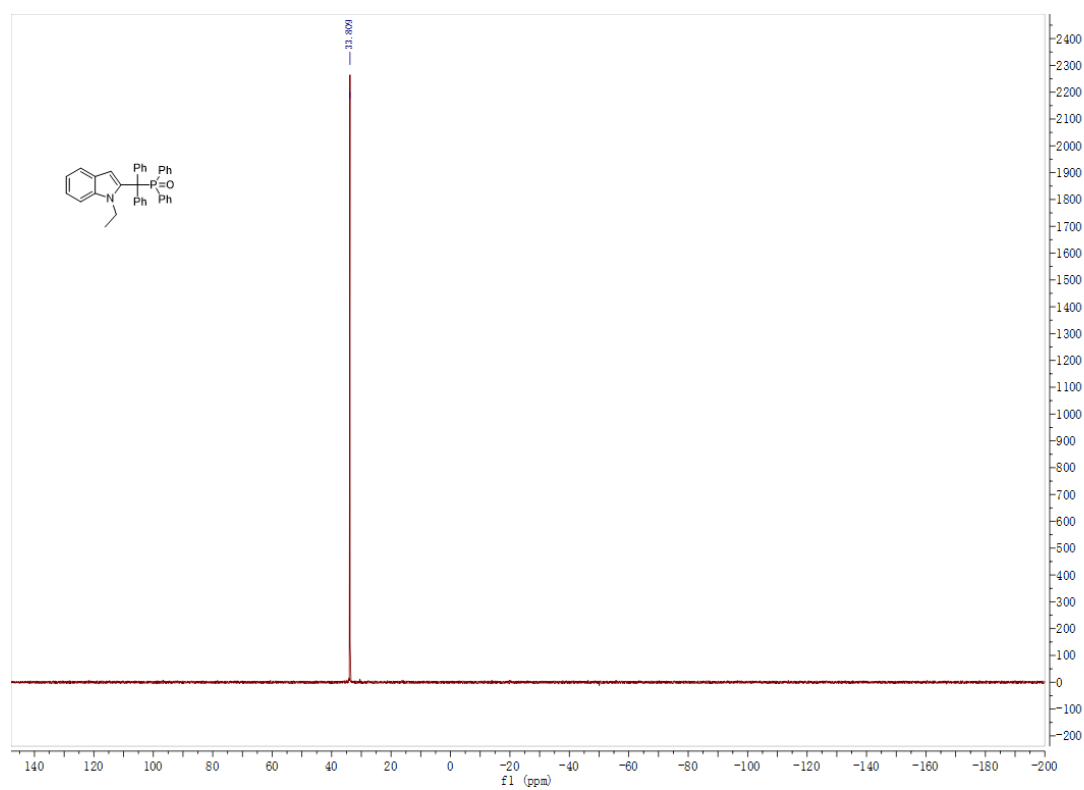

**3na**

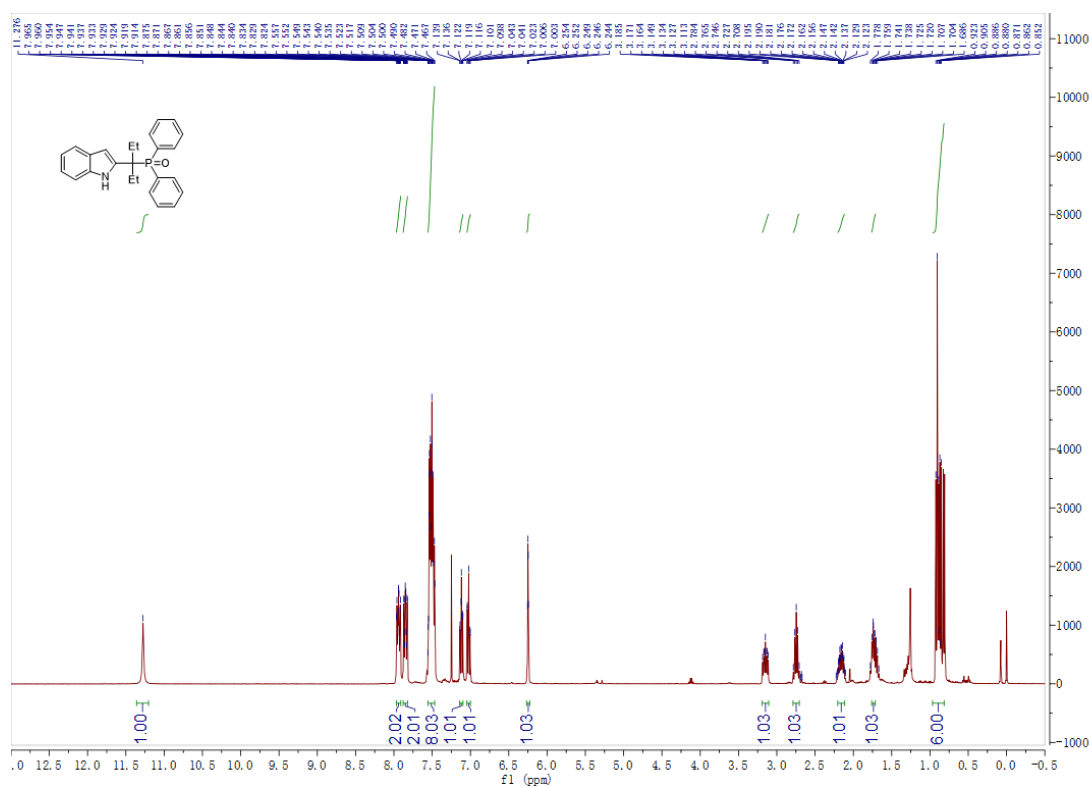

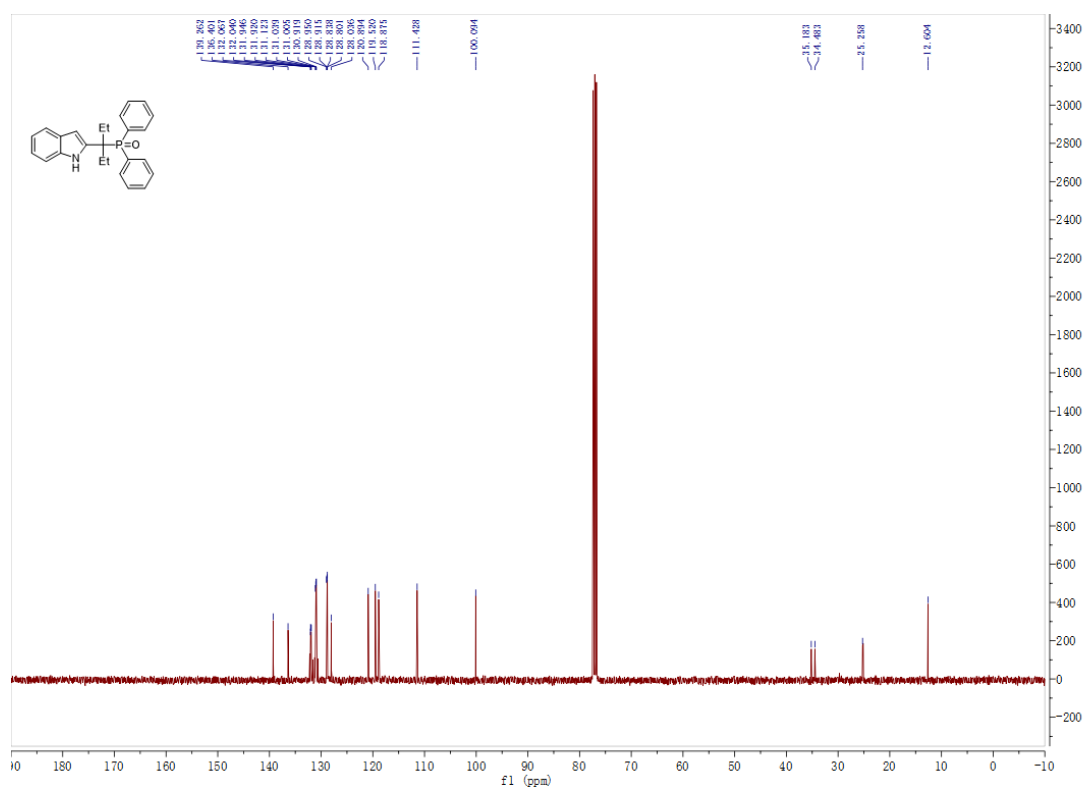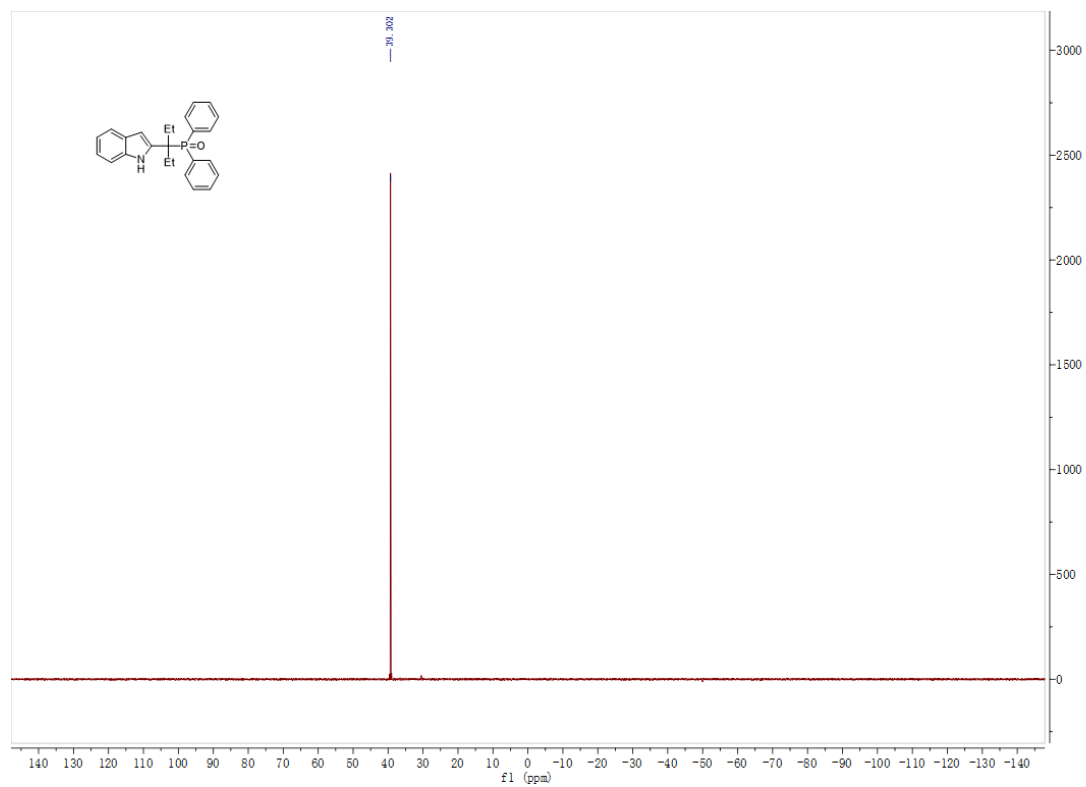

**3ab**



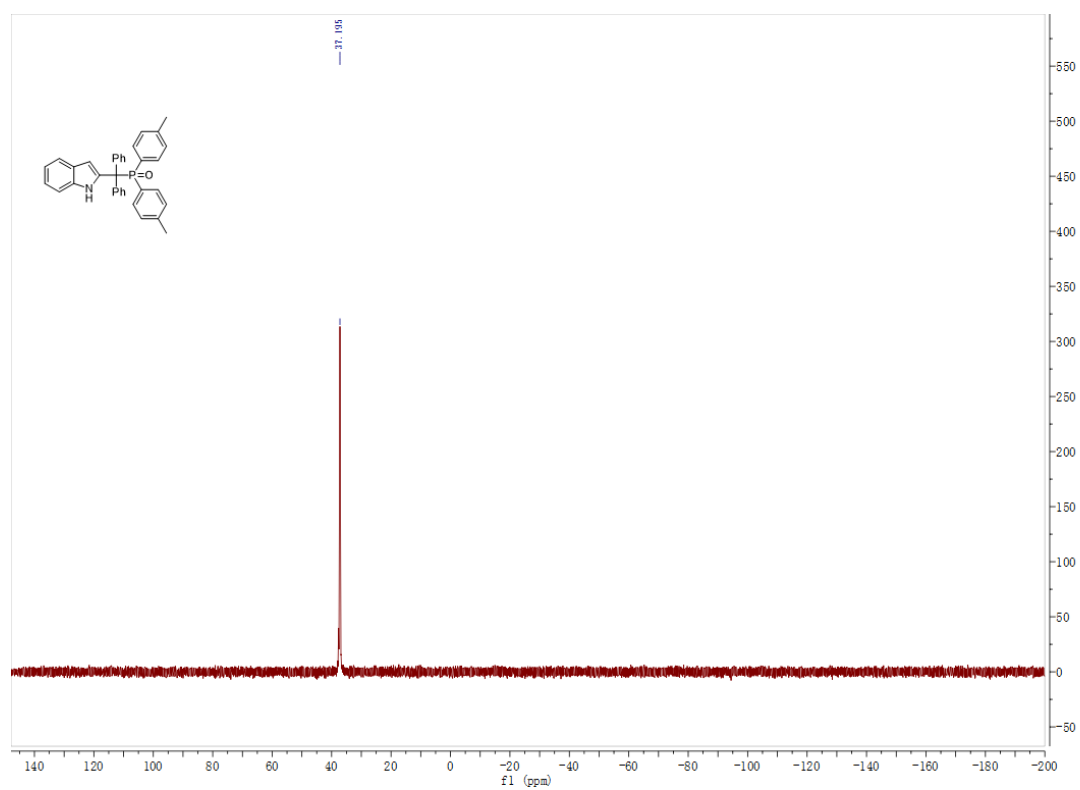

**3ac**

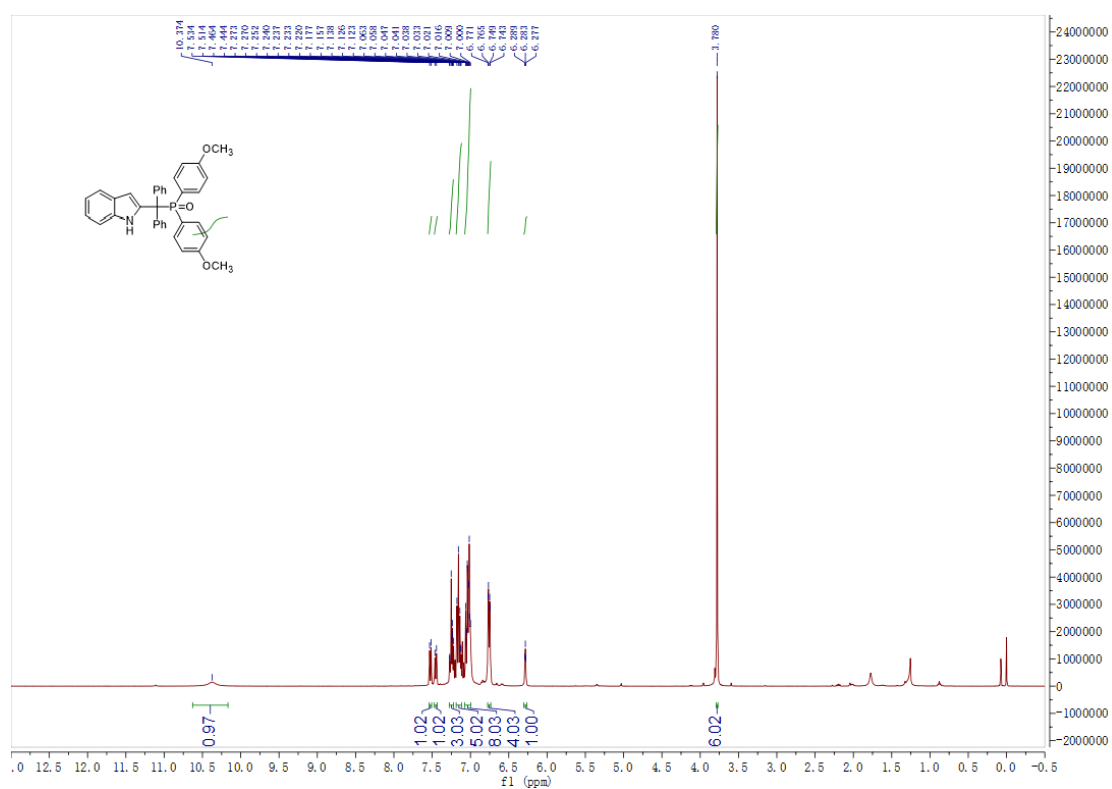

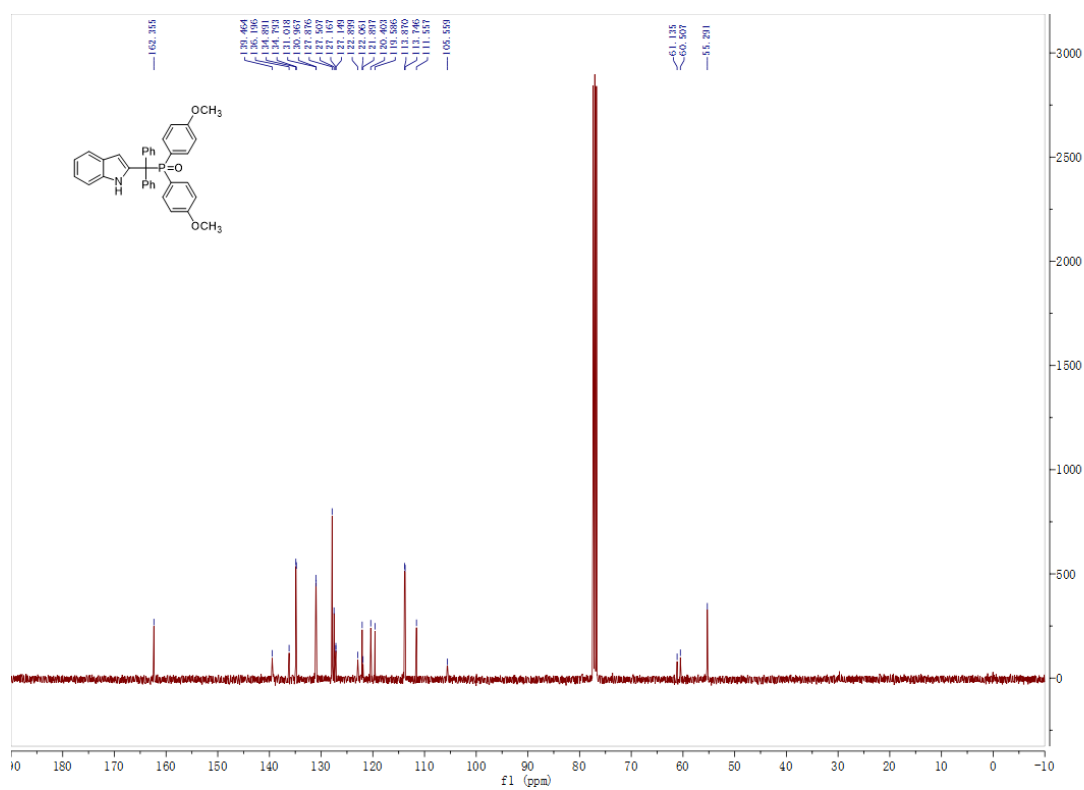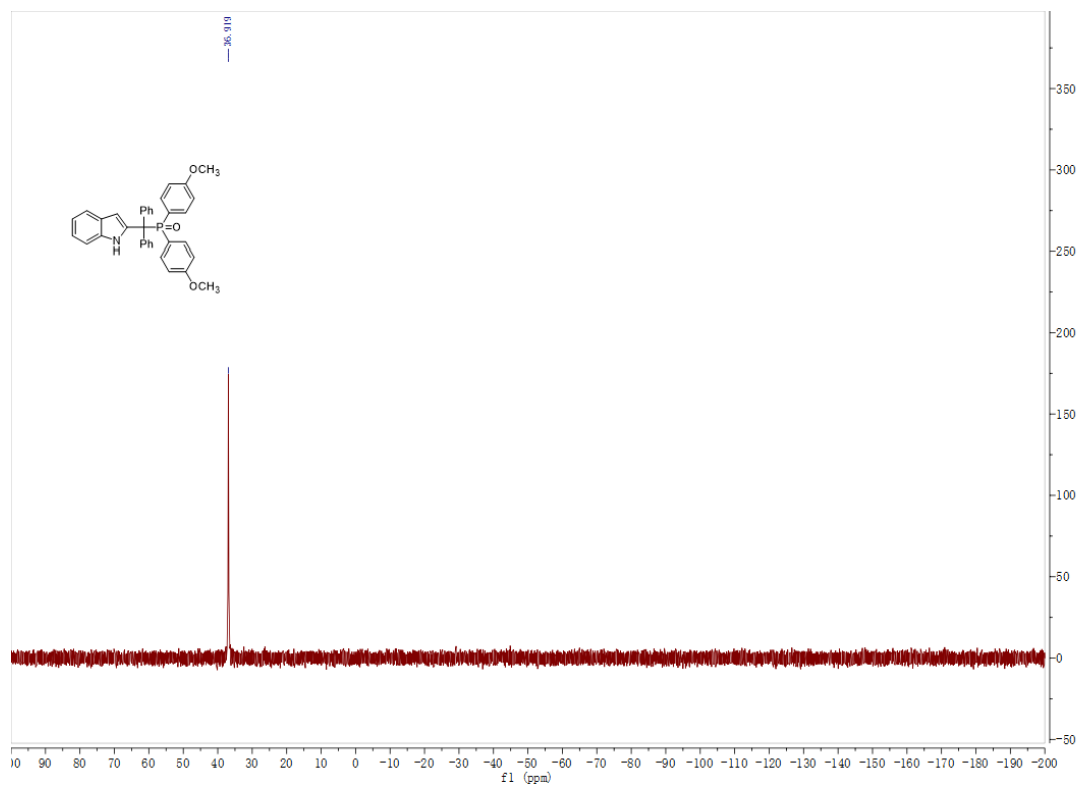

**3ad**

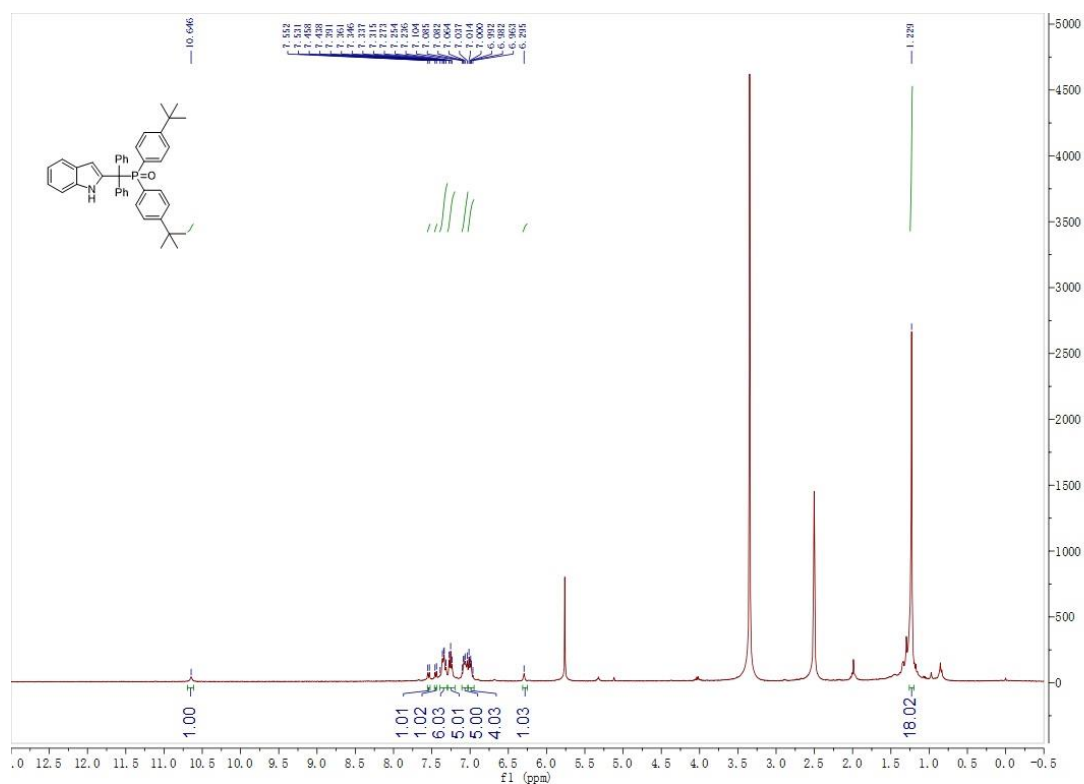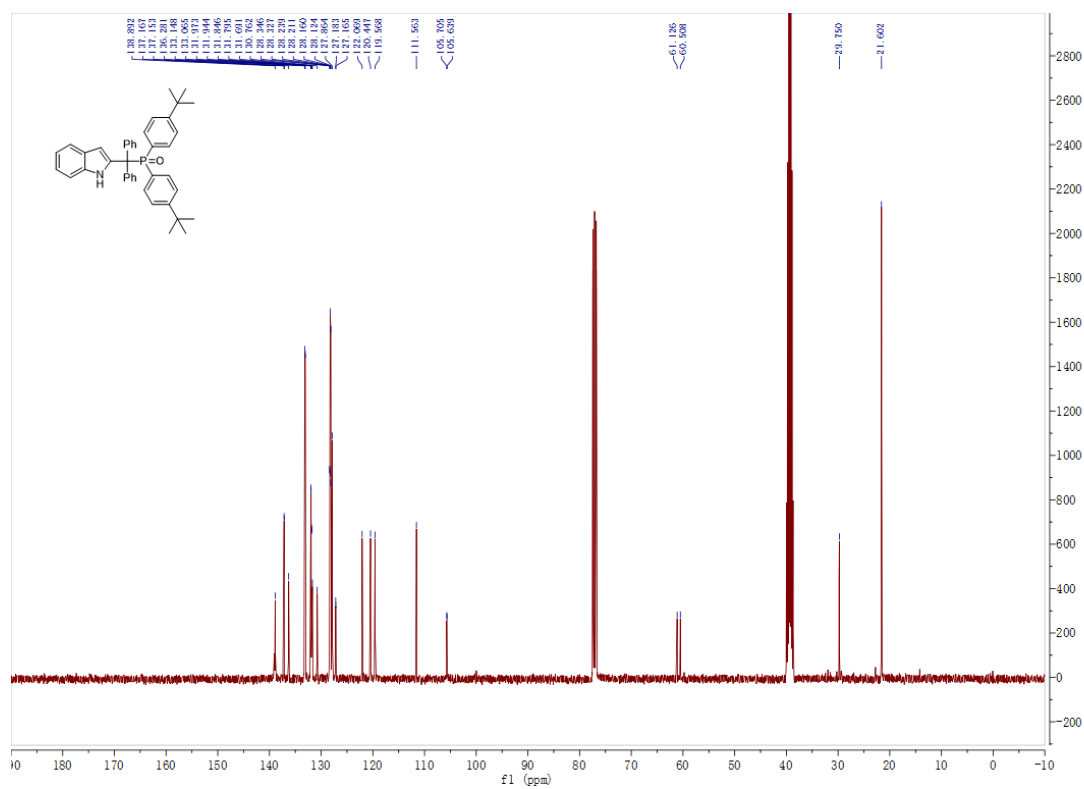

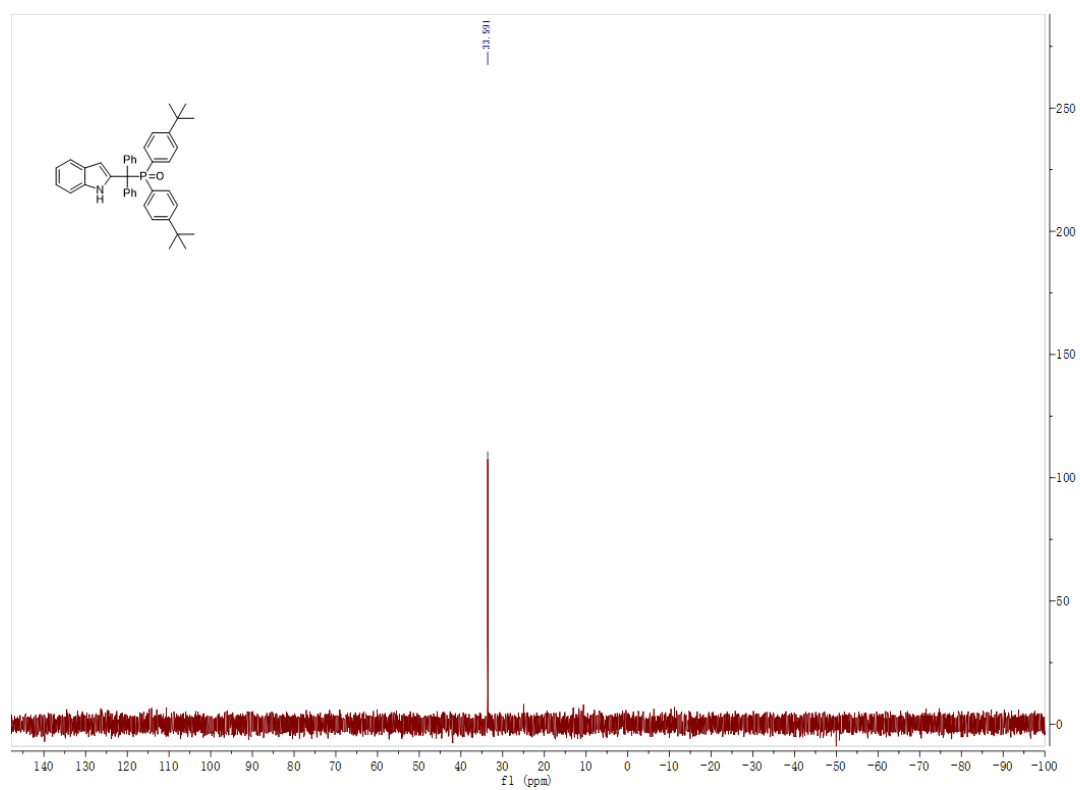

**3ae**

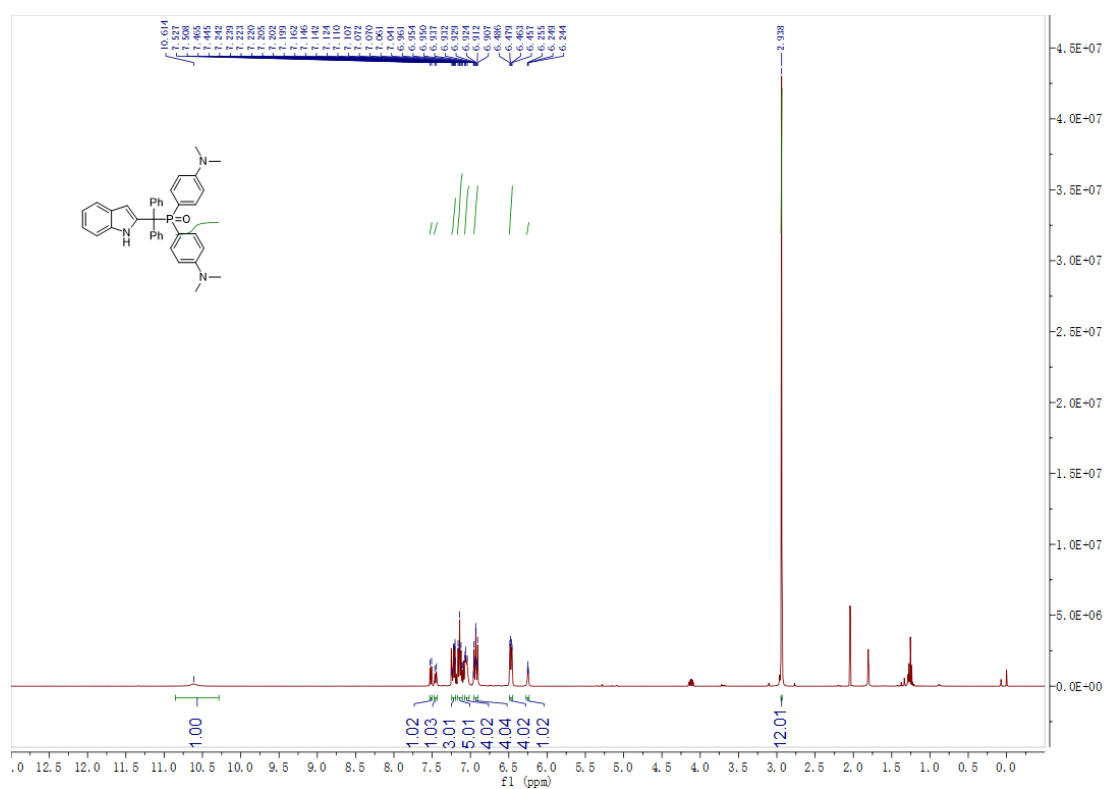

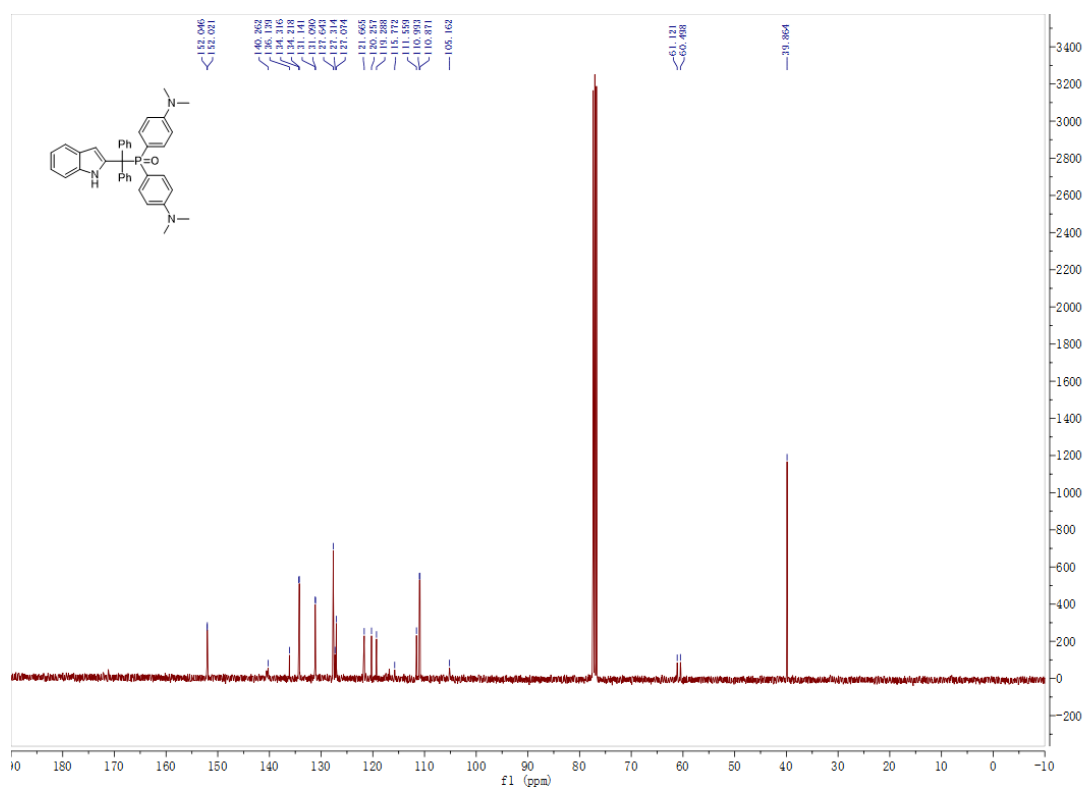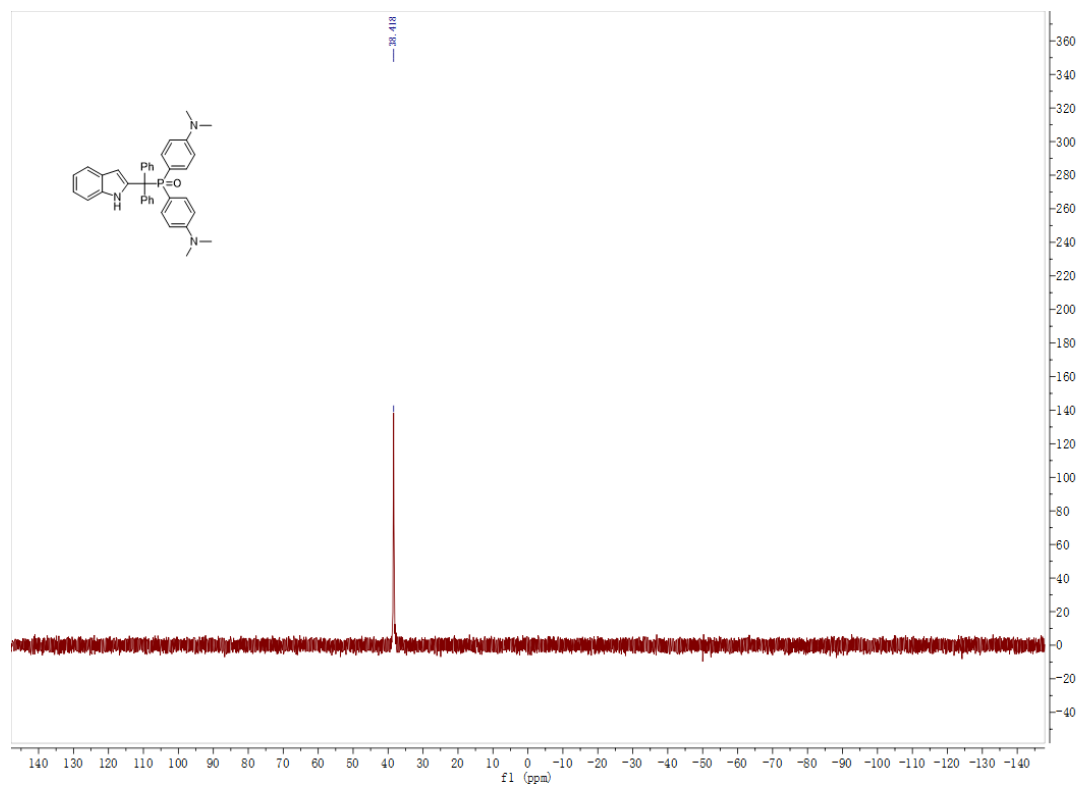

**3af**



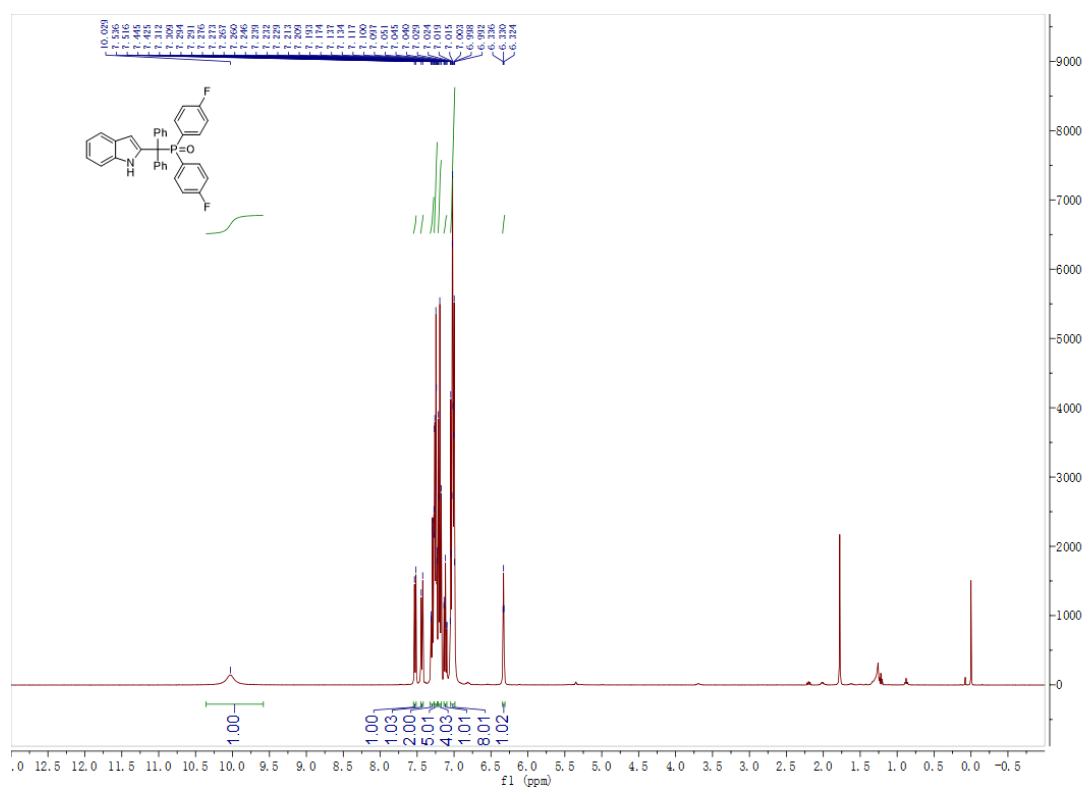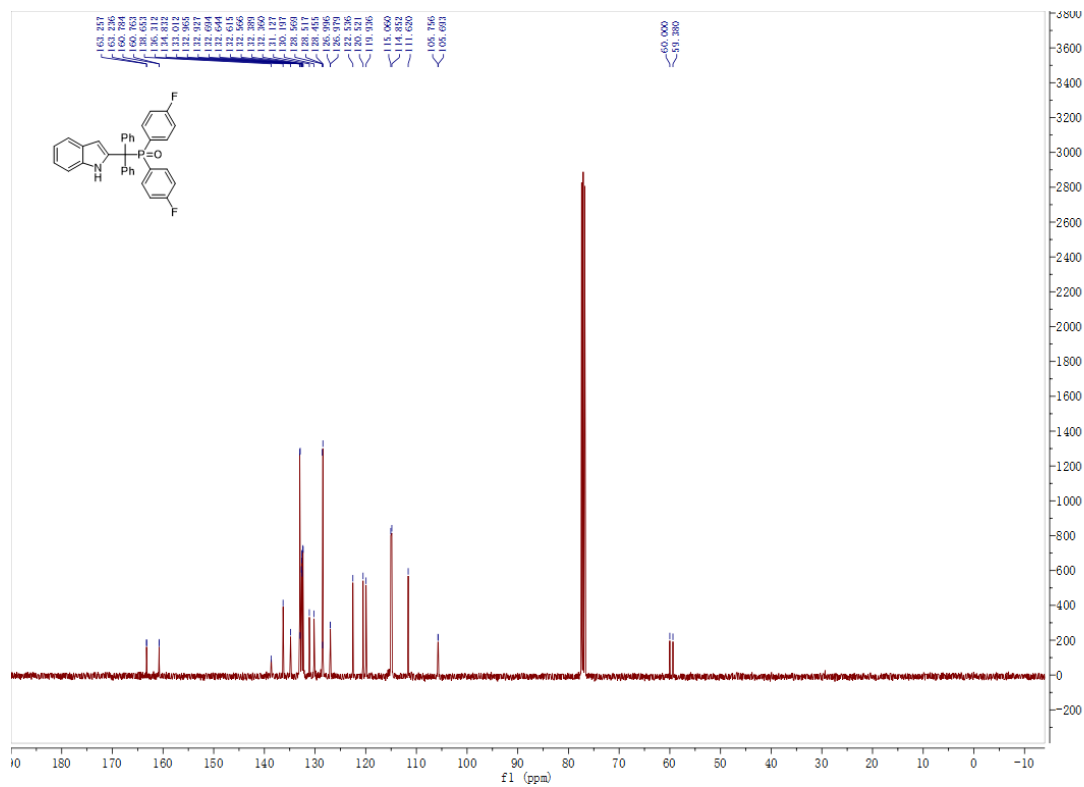

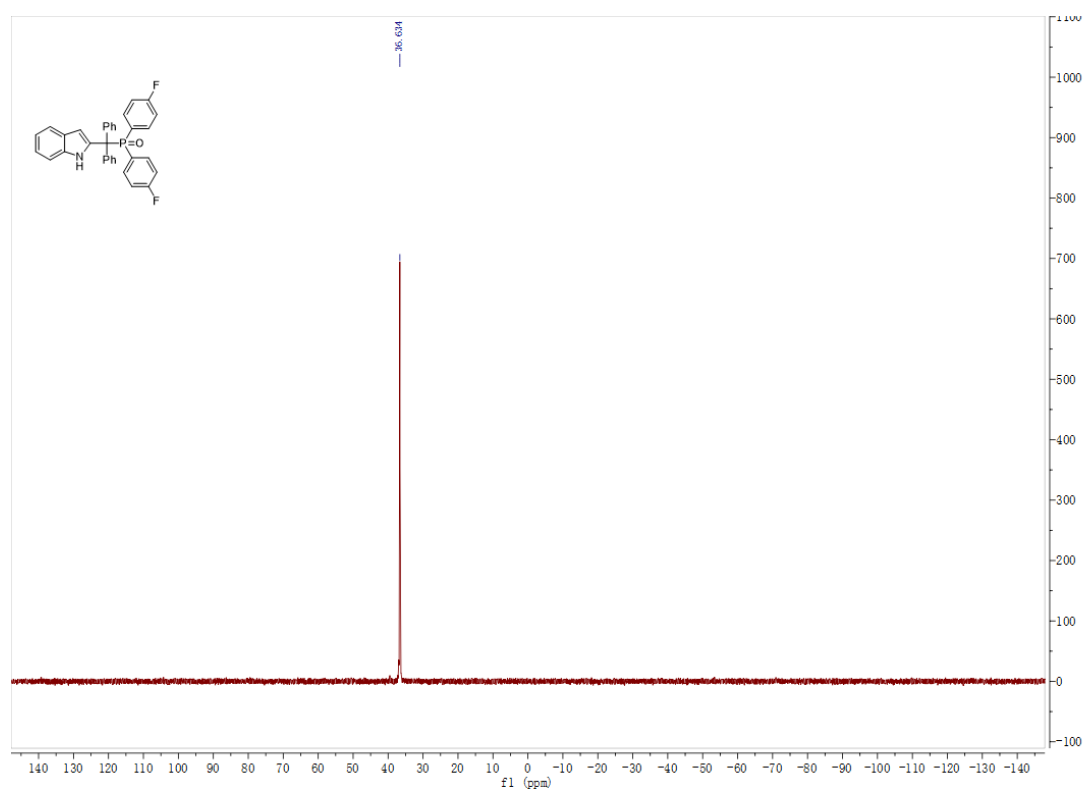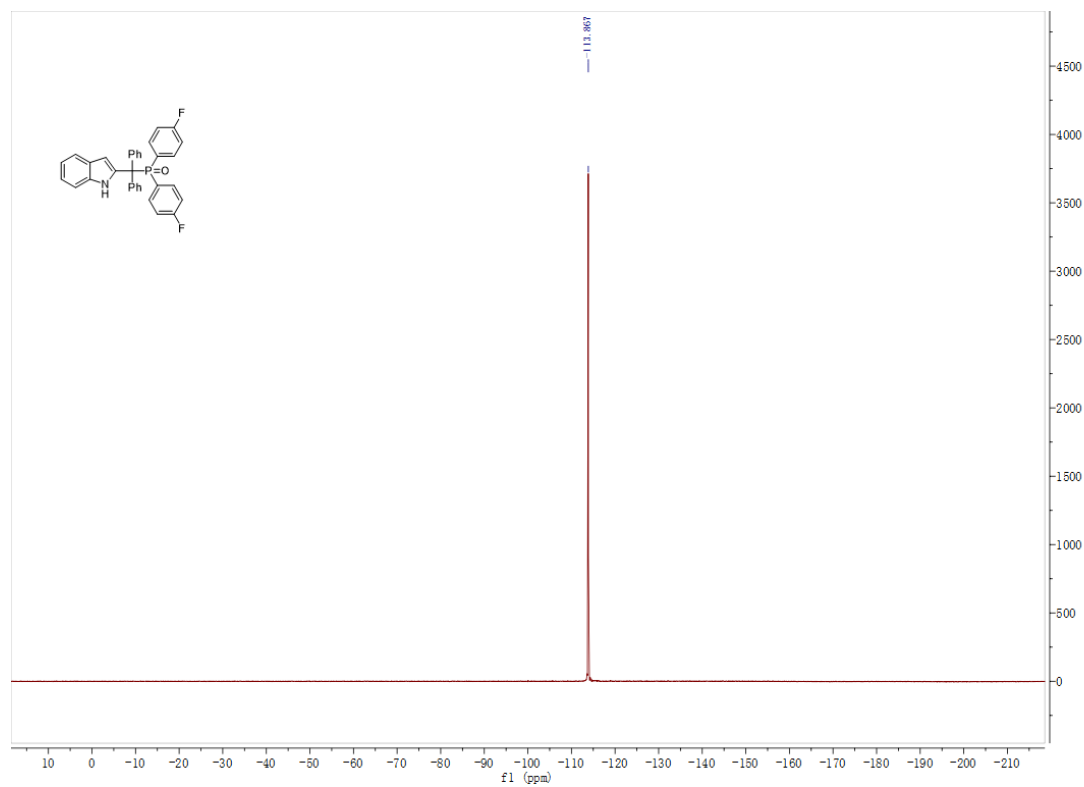

**3ag**

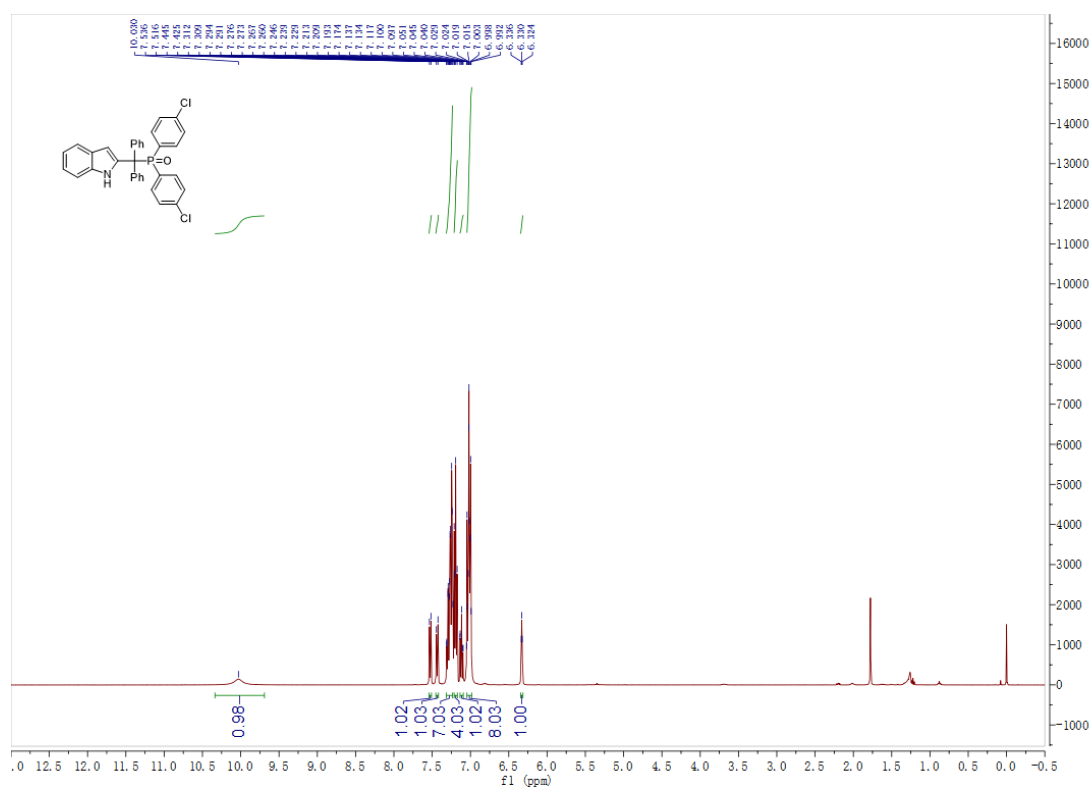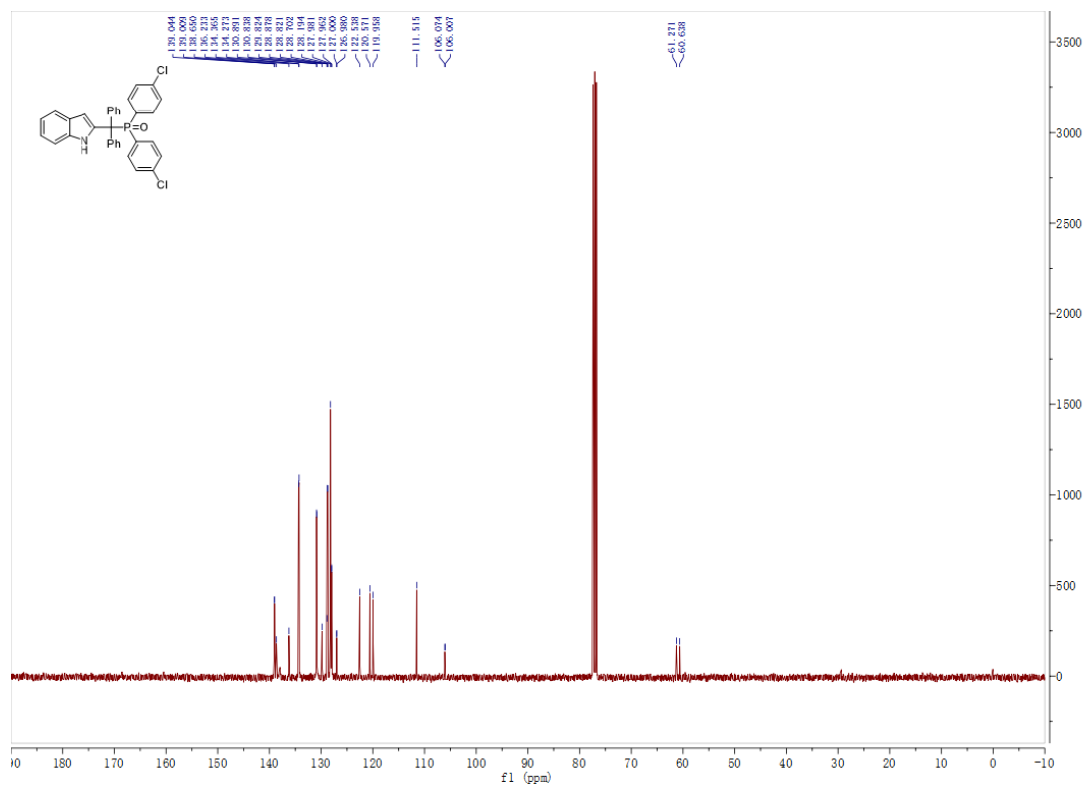

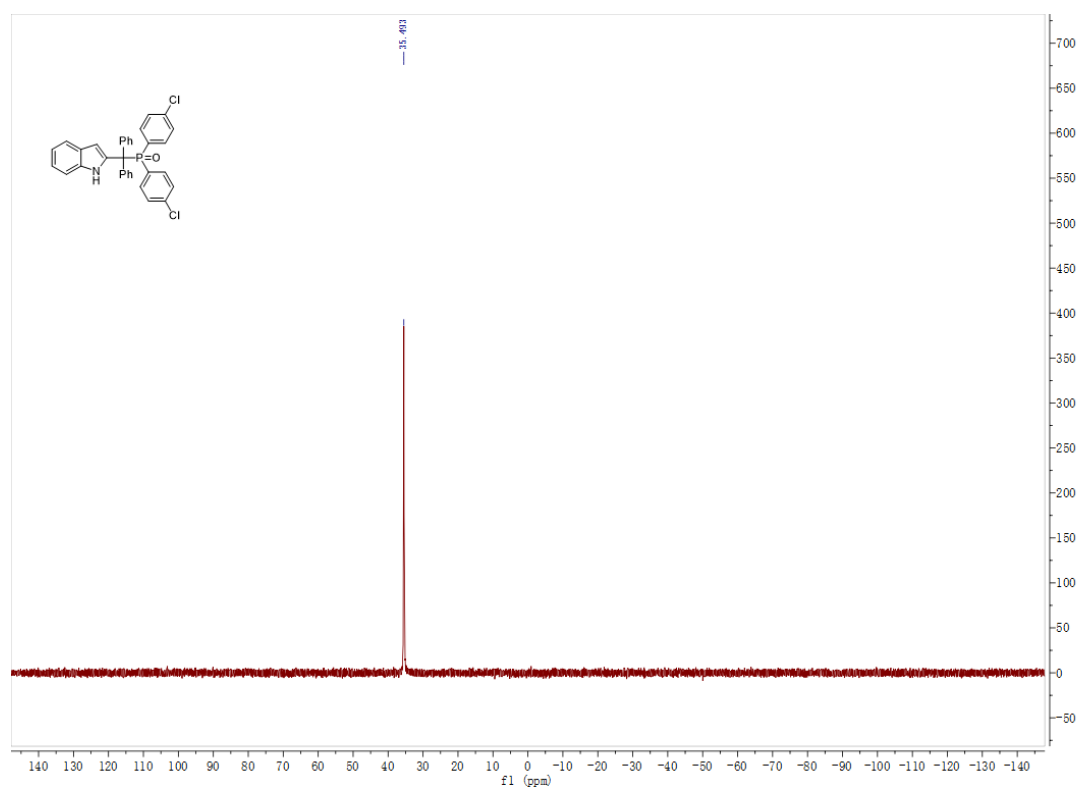

**3ah**

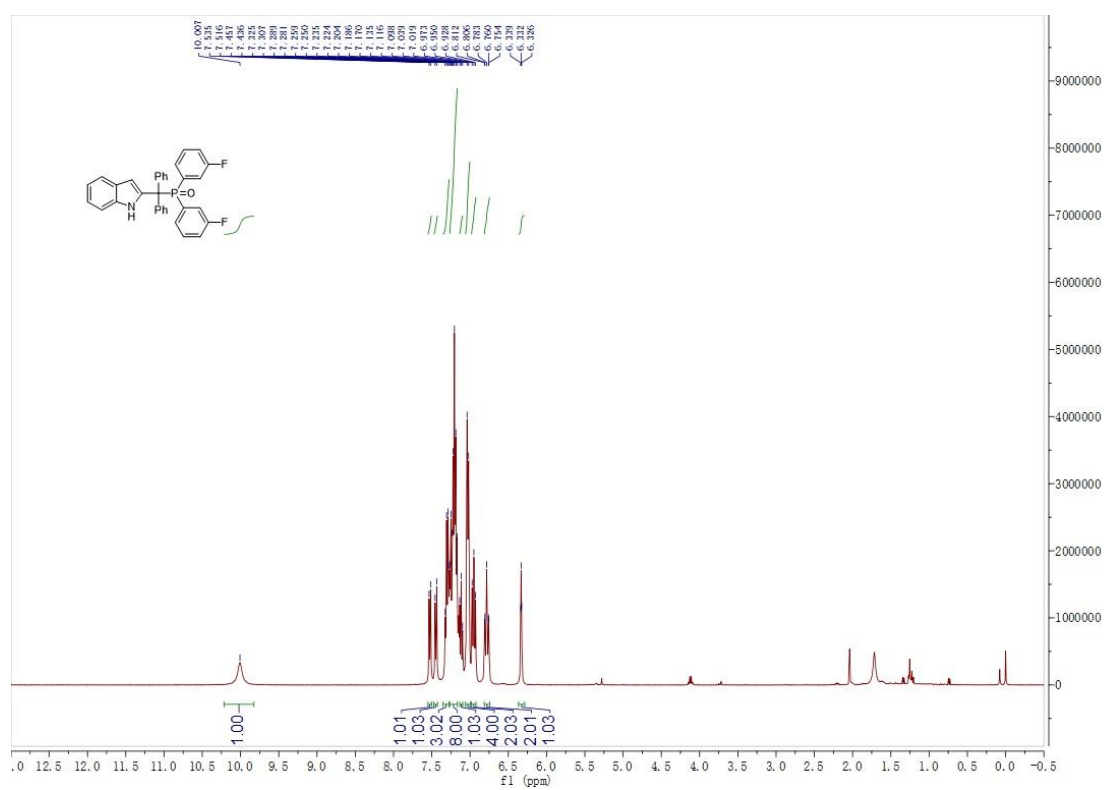

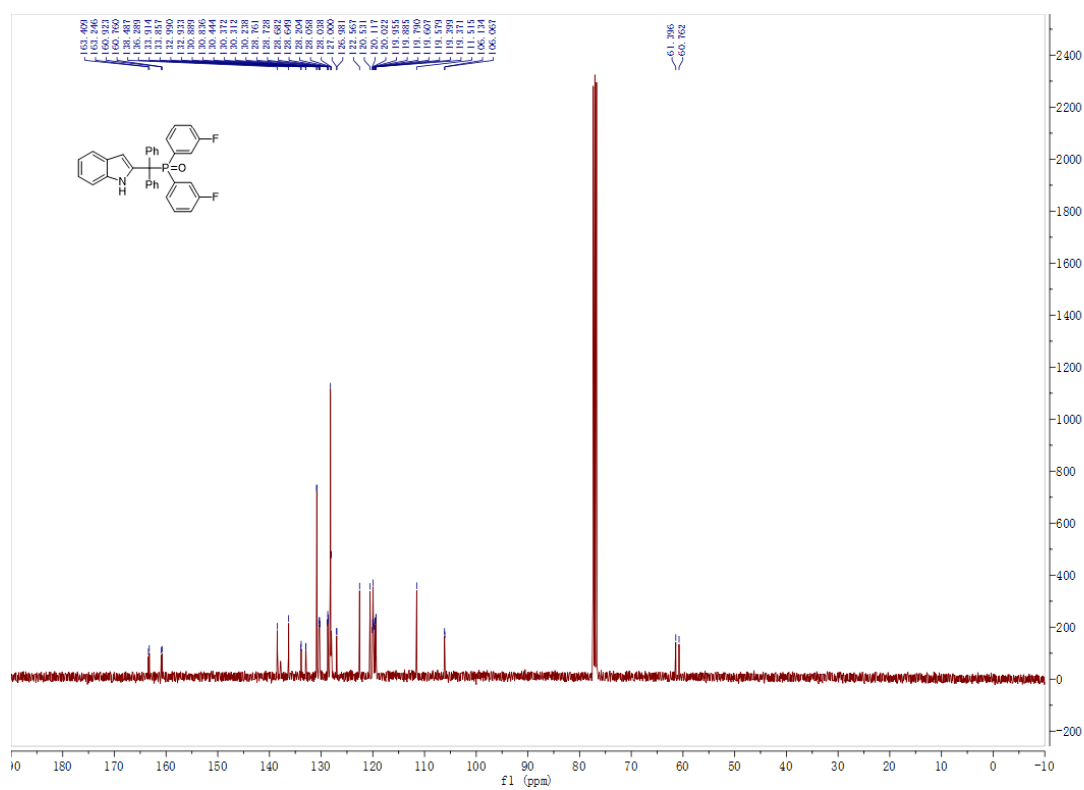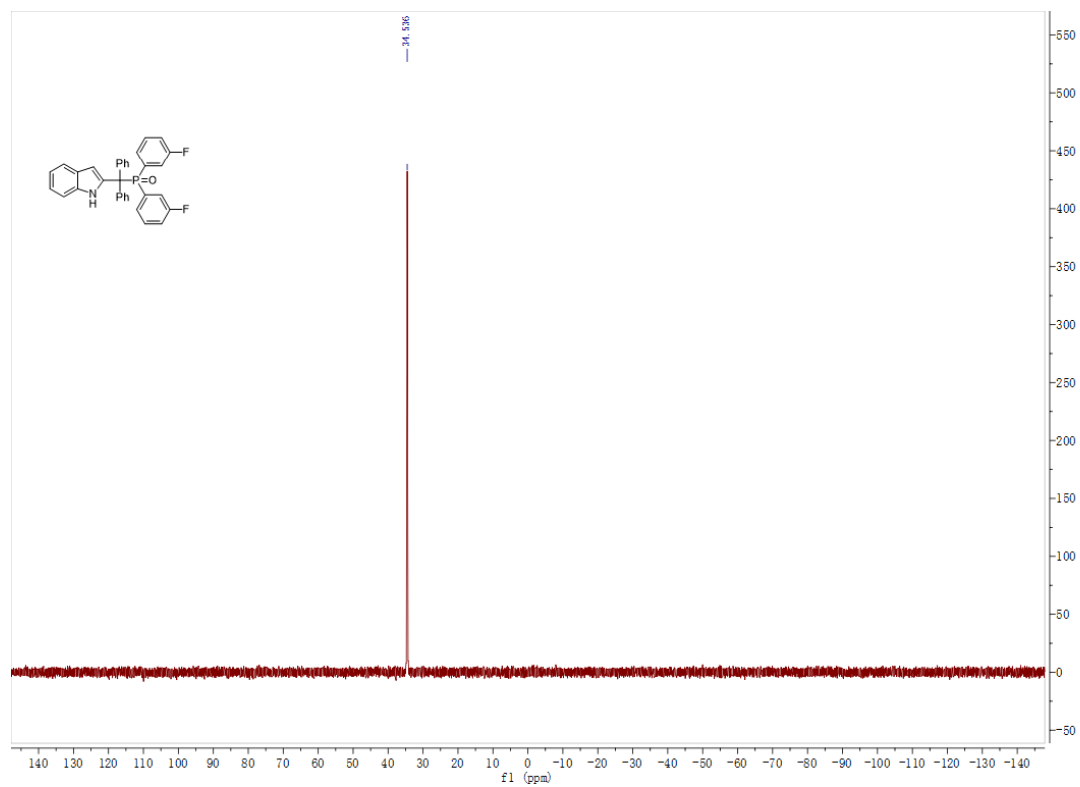

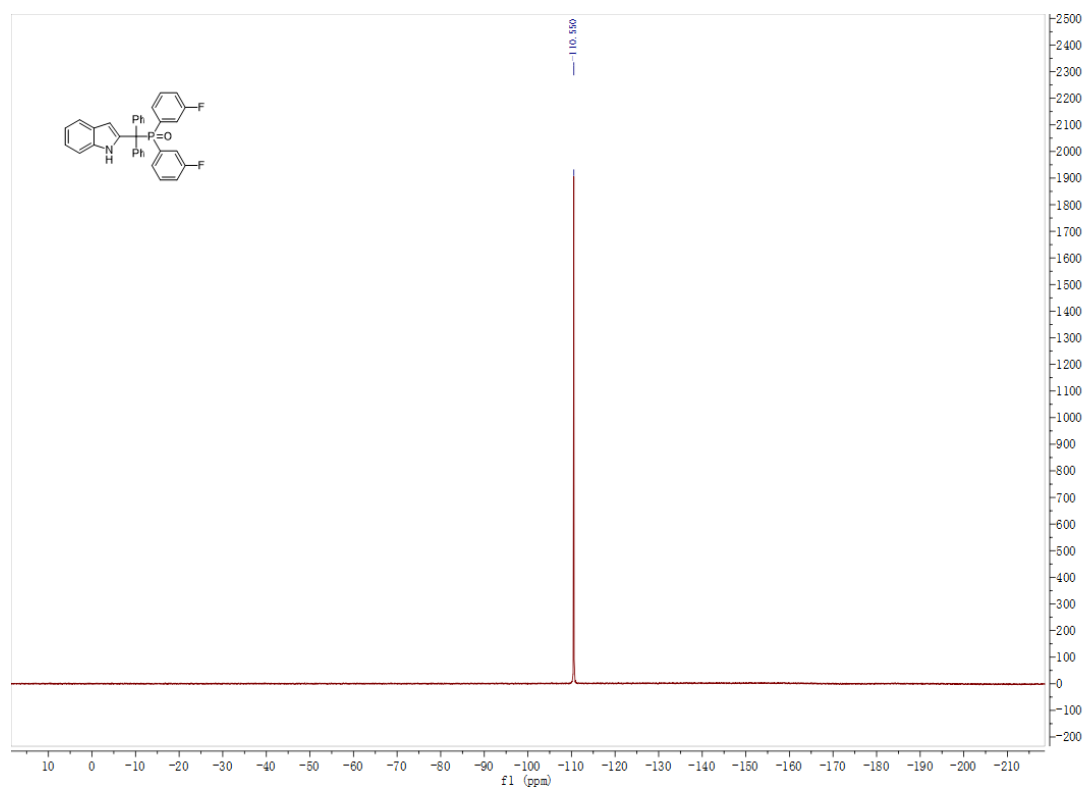

**3ai**

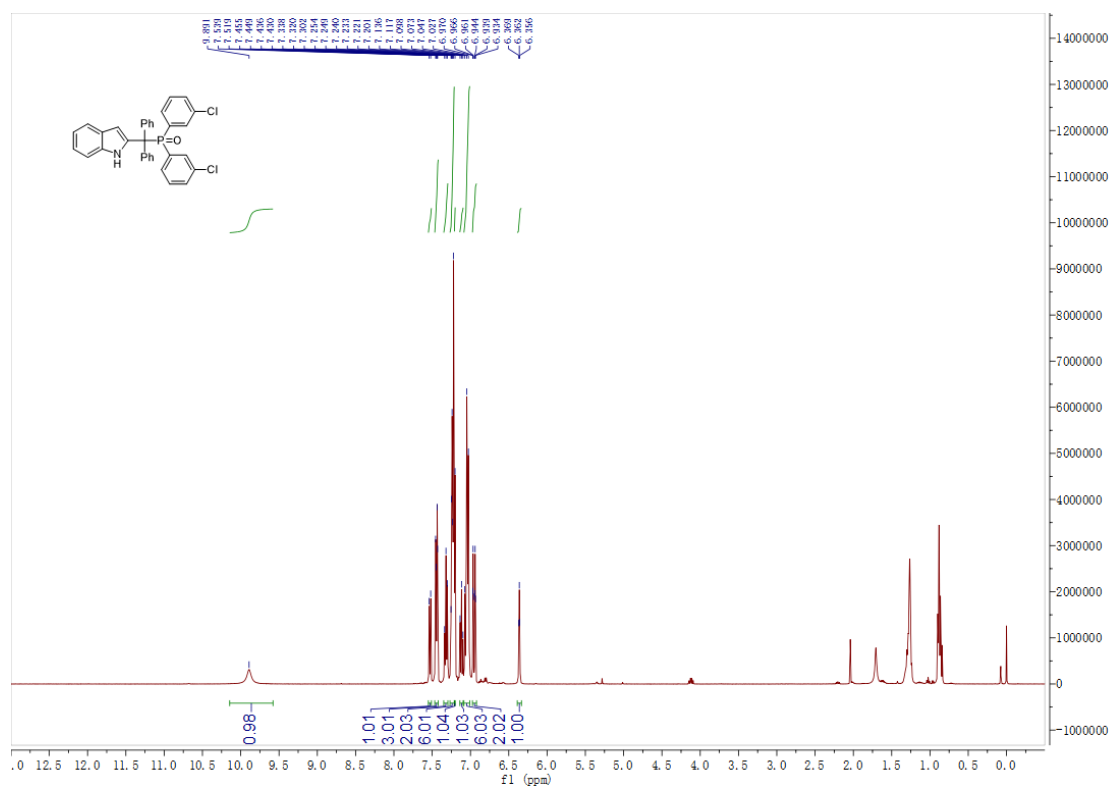

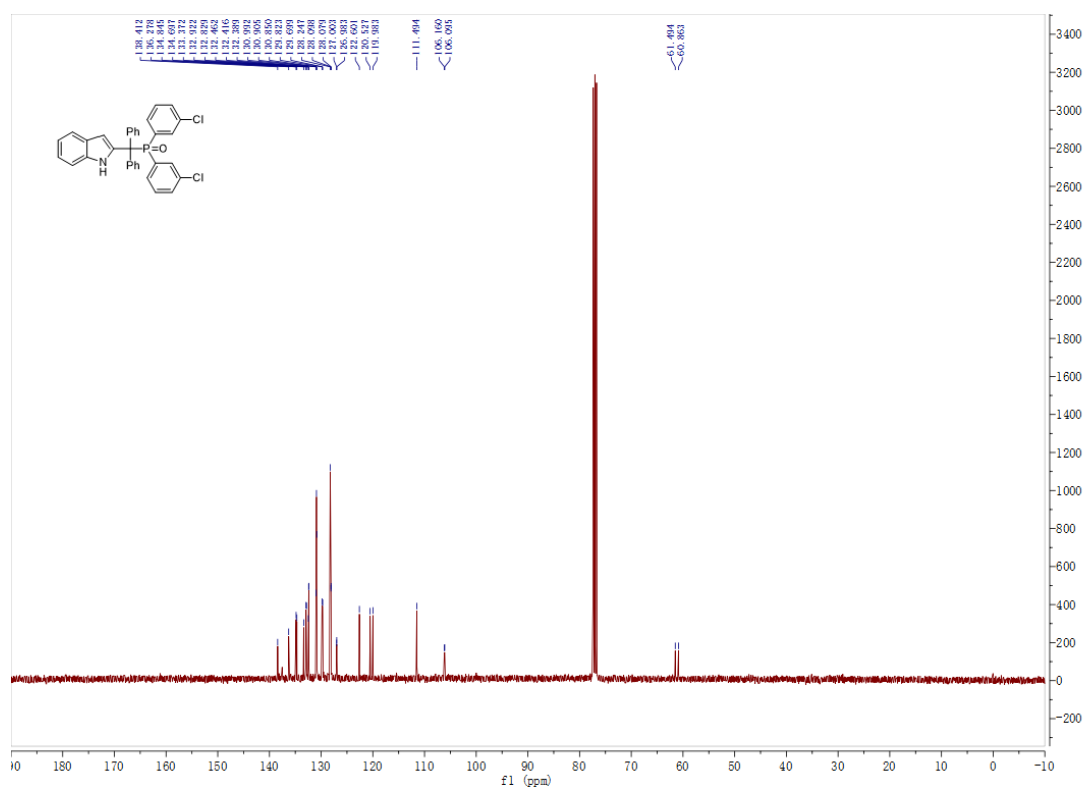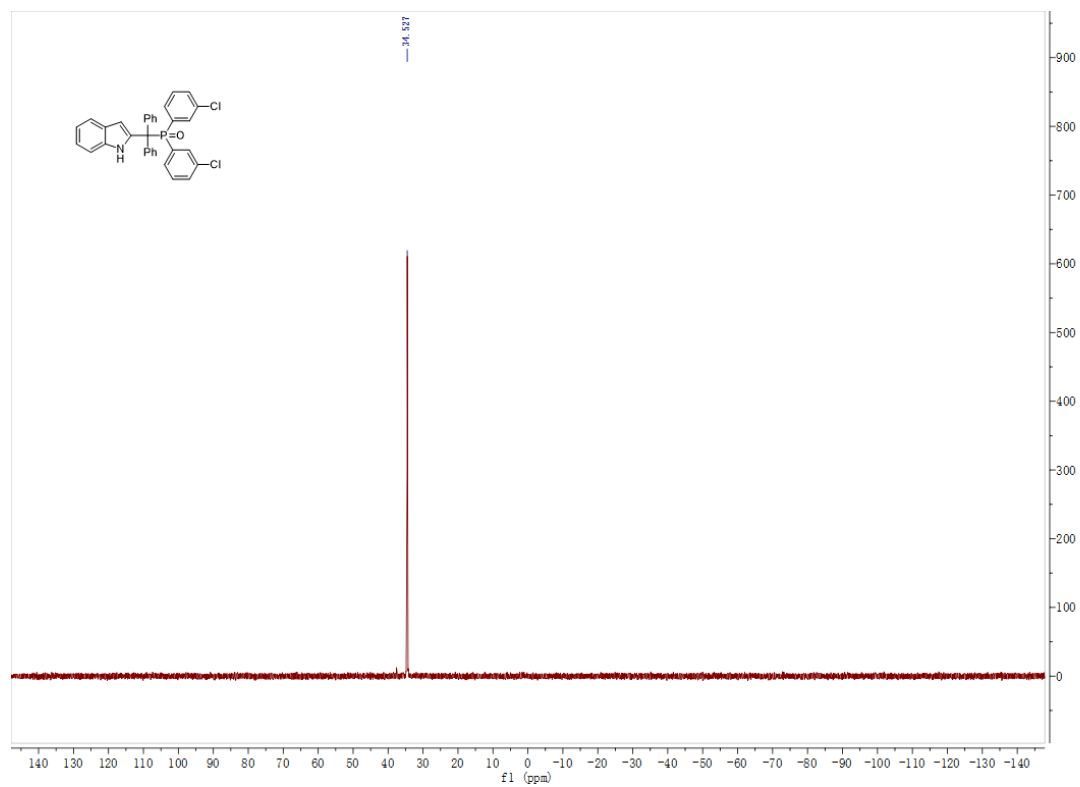

**3aj**

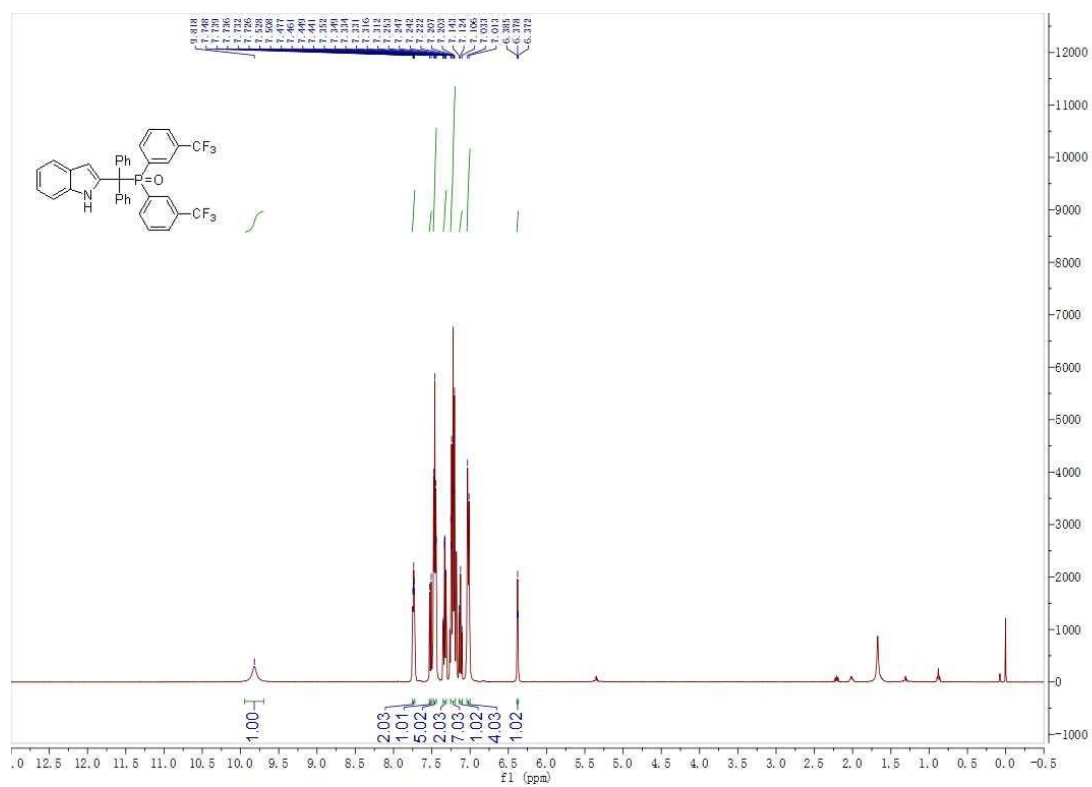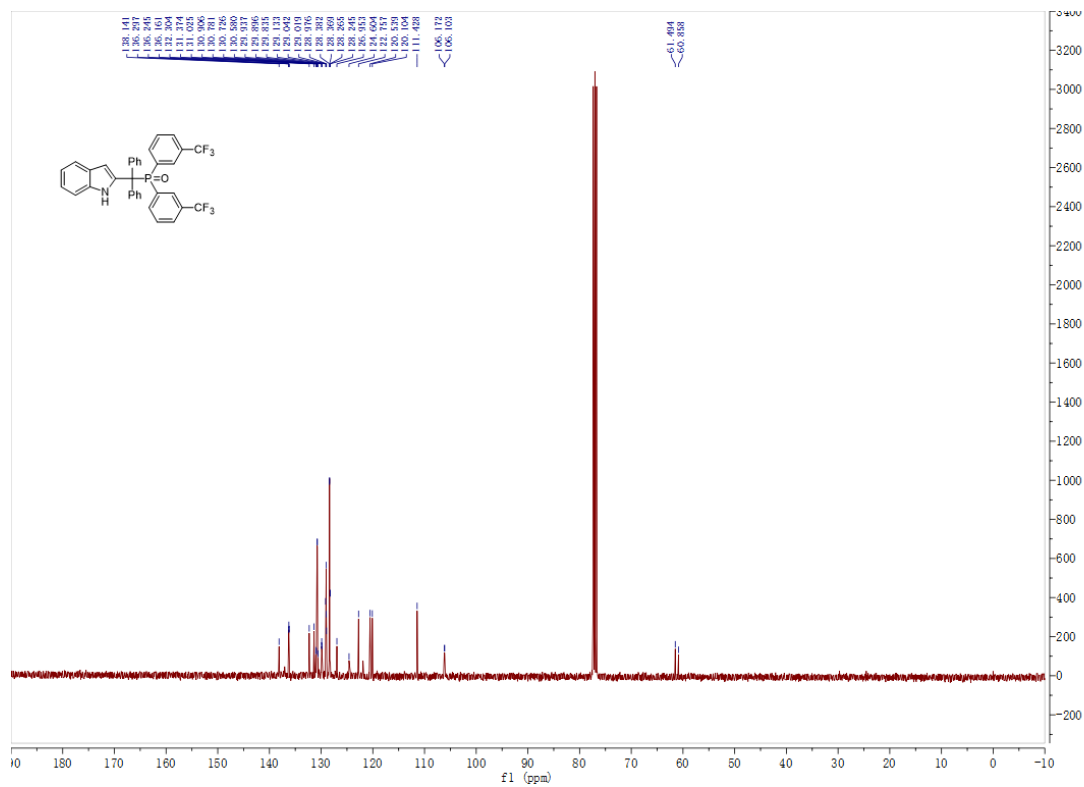



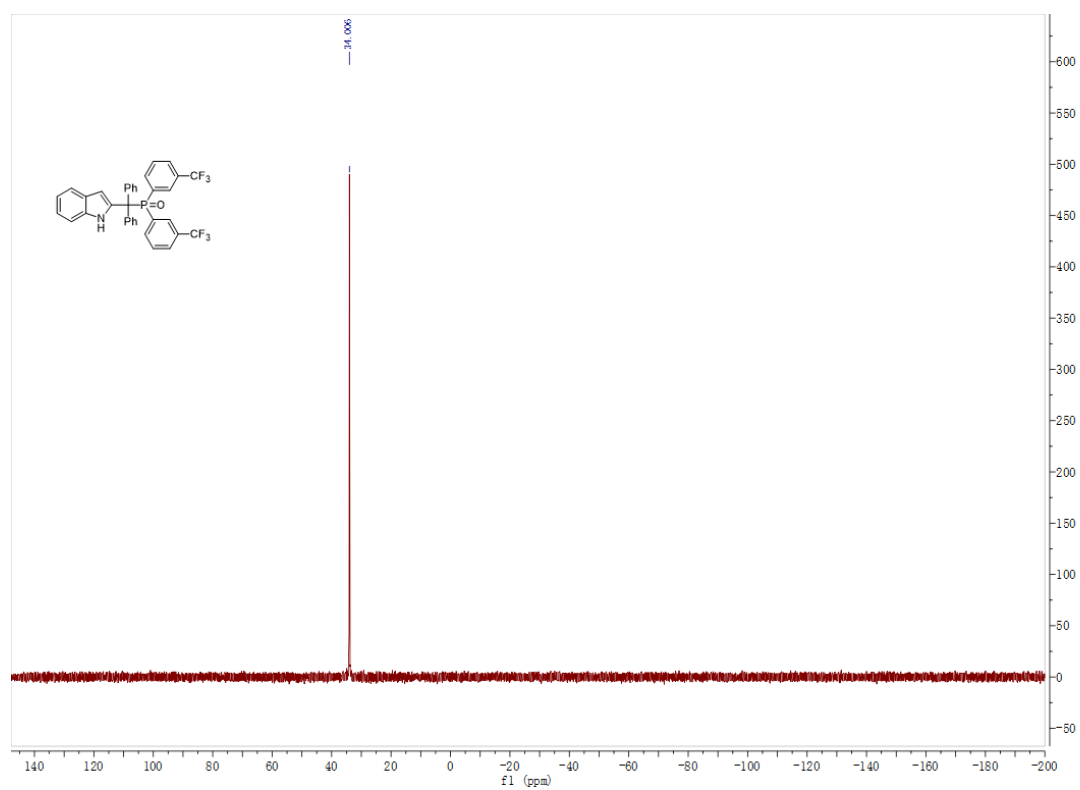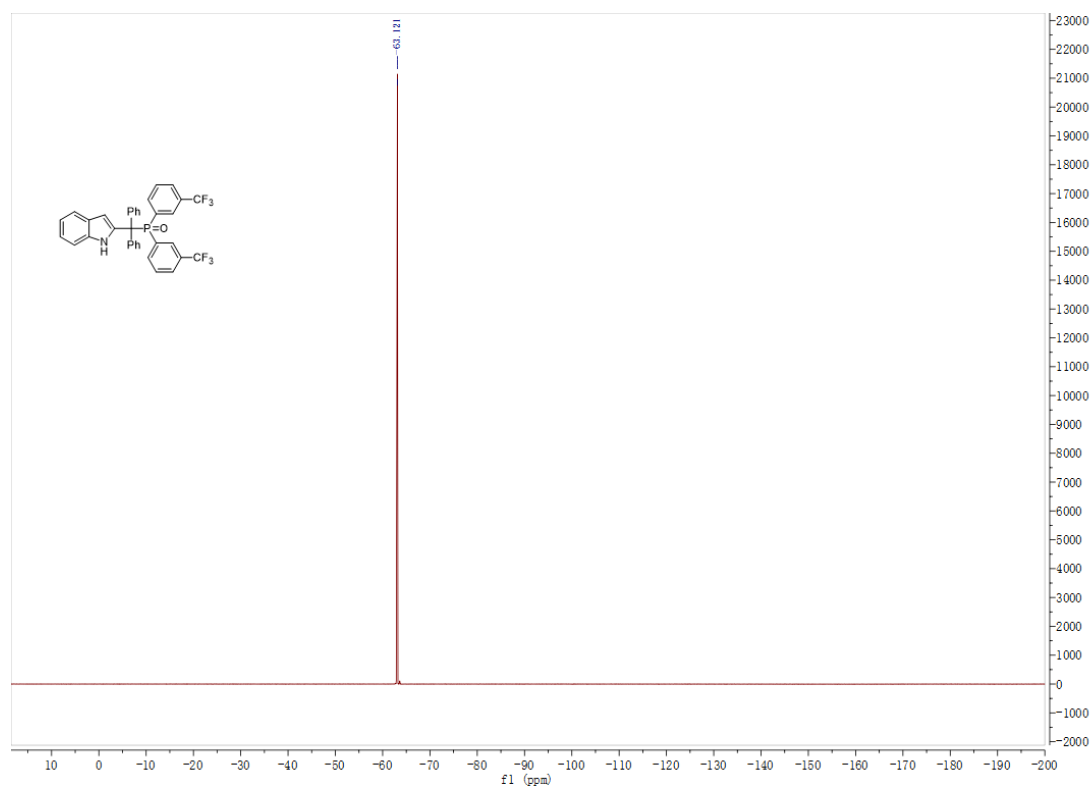

**3am**



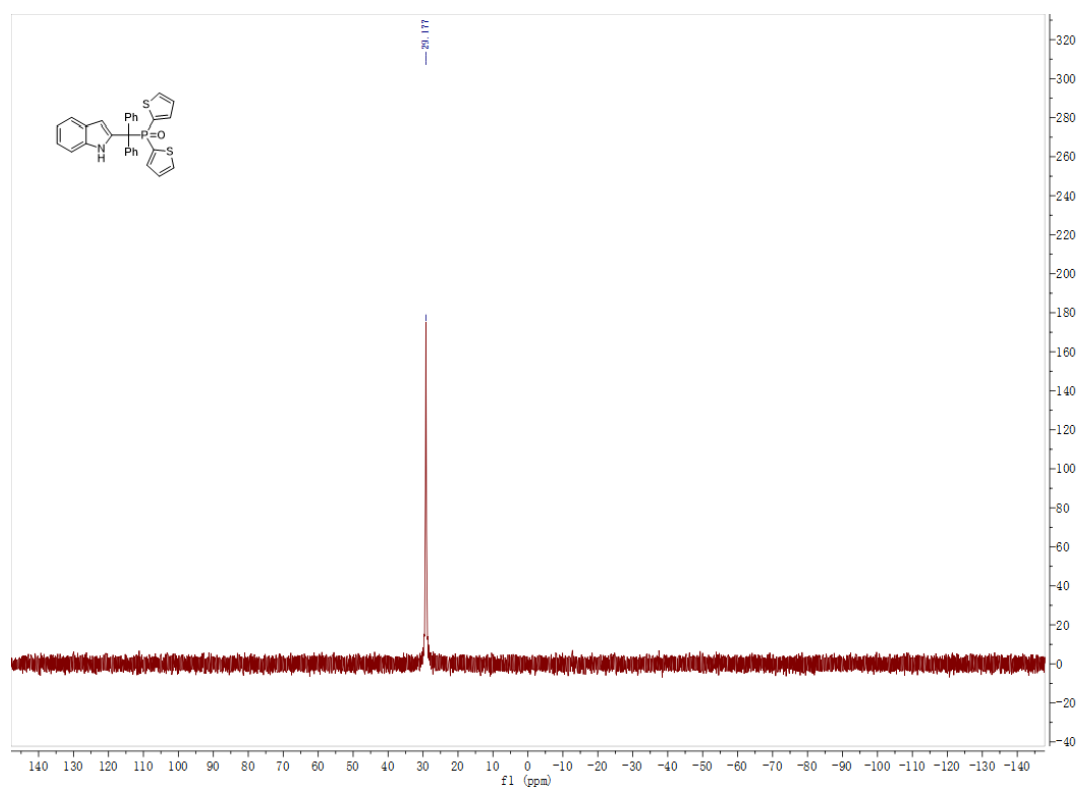

**3an**

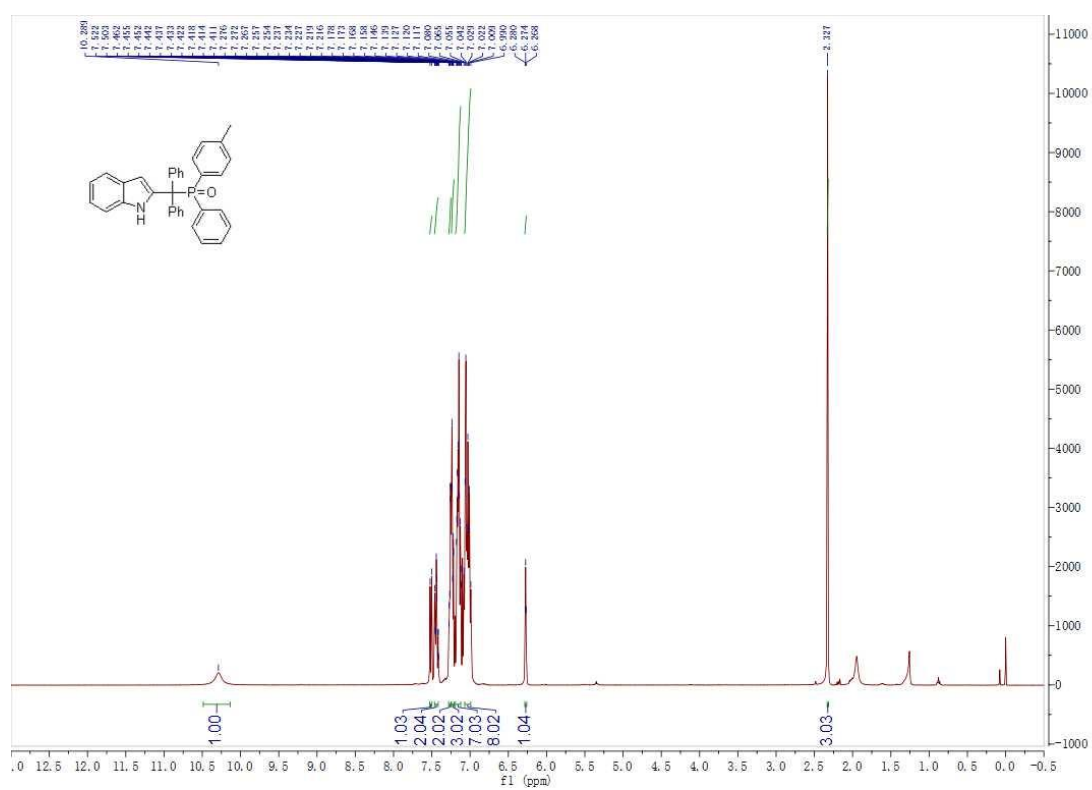

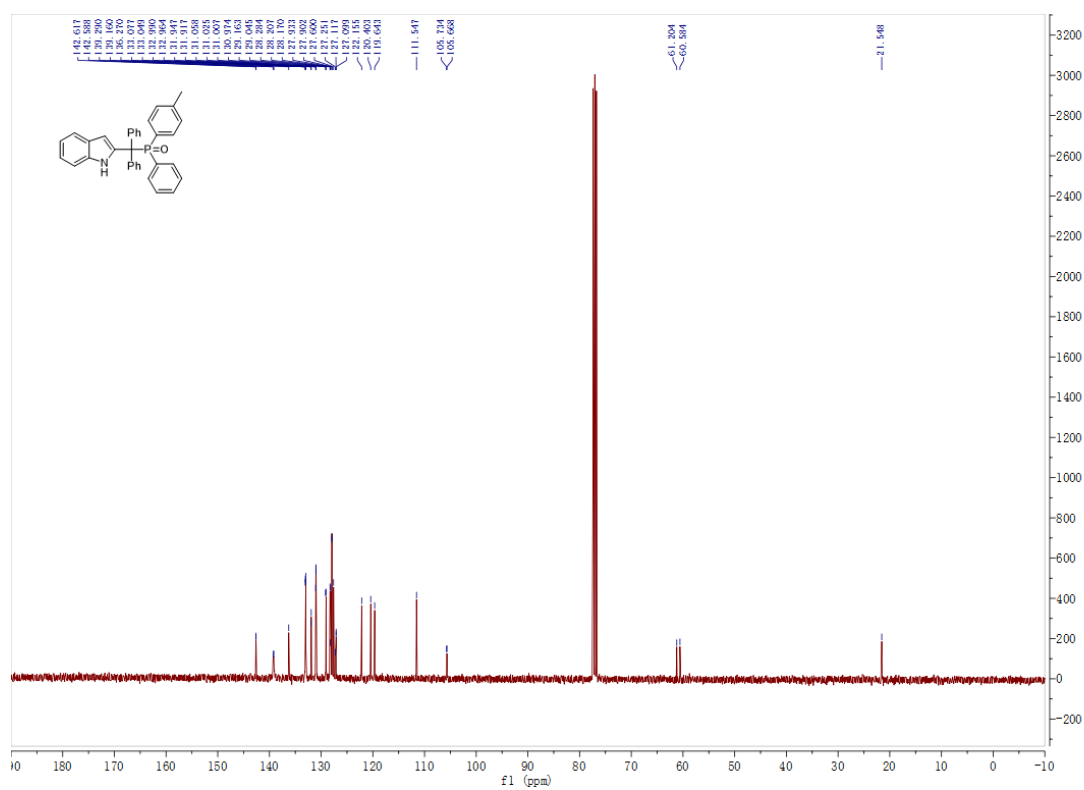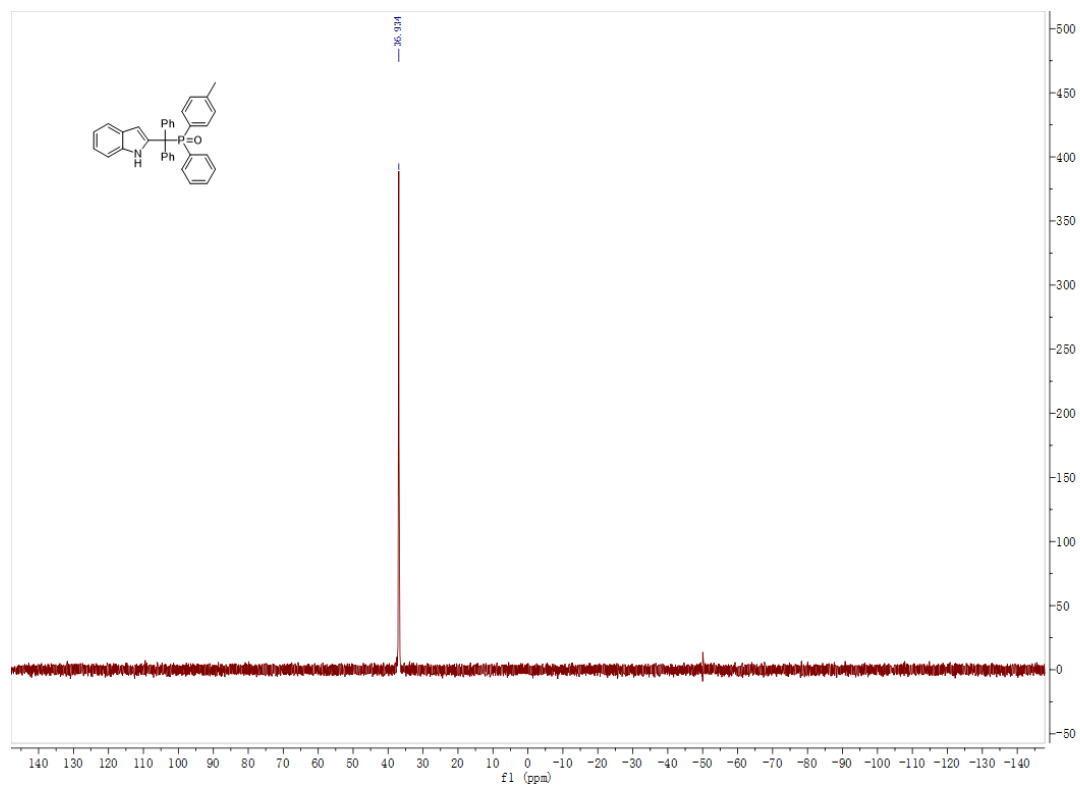

**3ao**

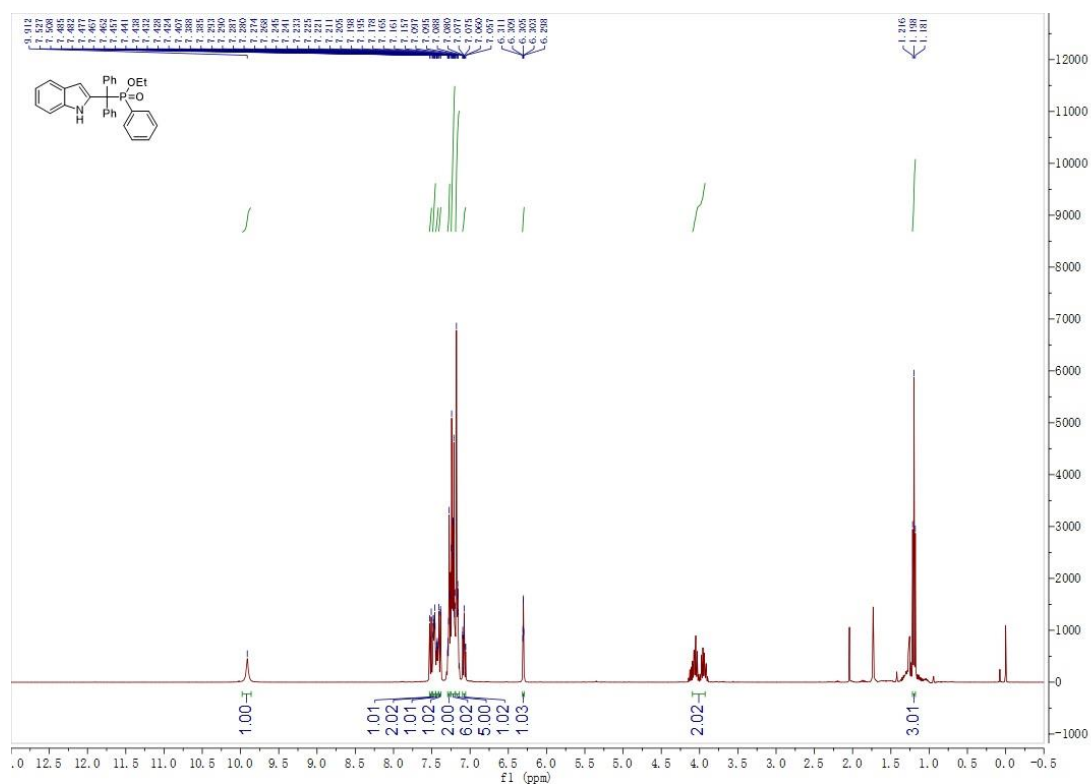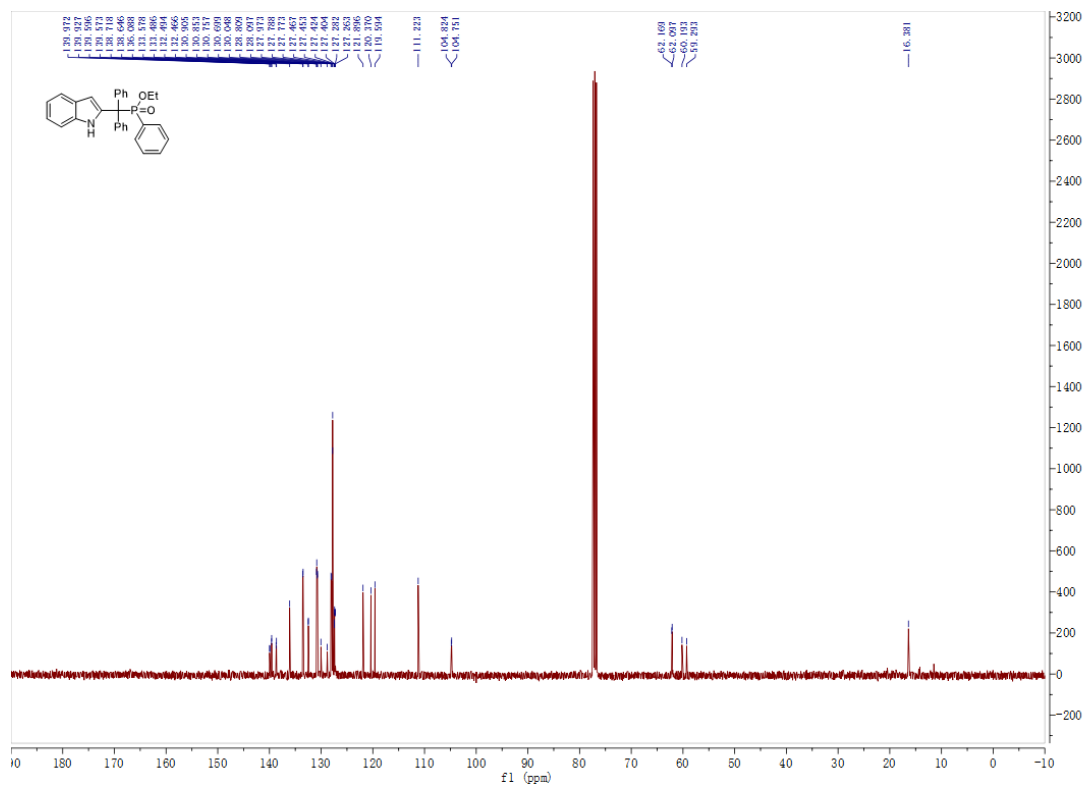

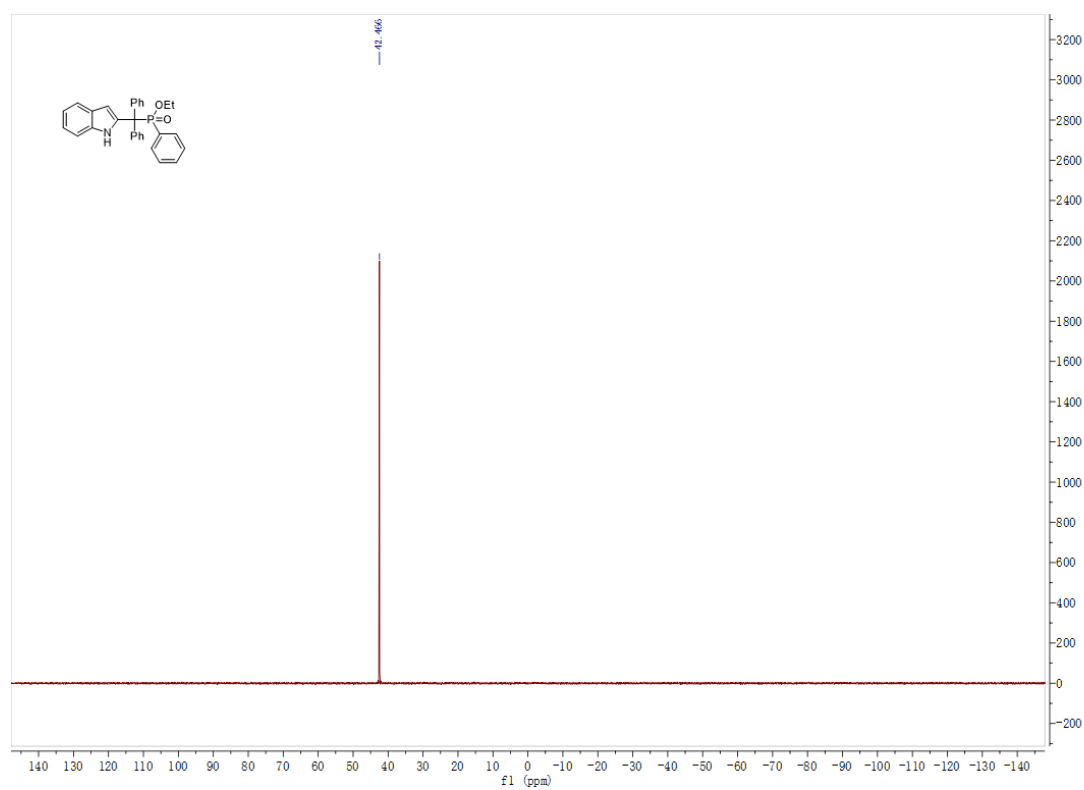

**4aa**

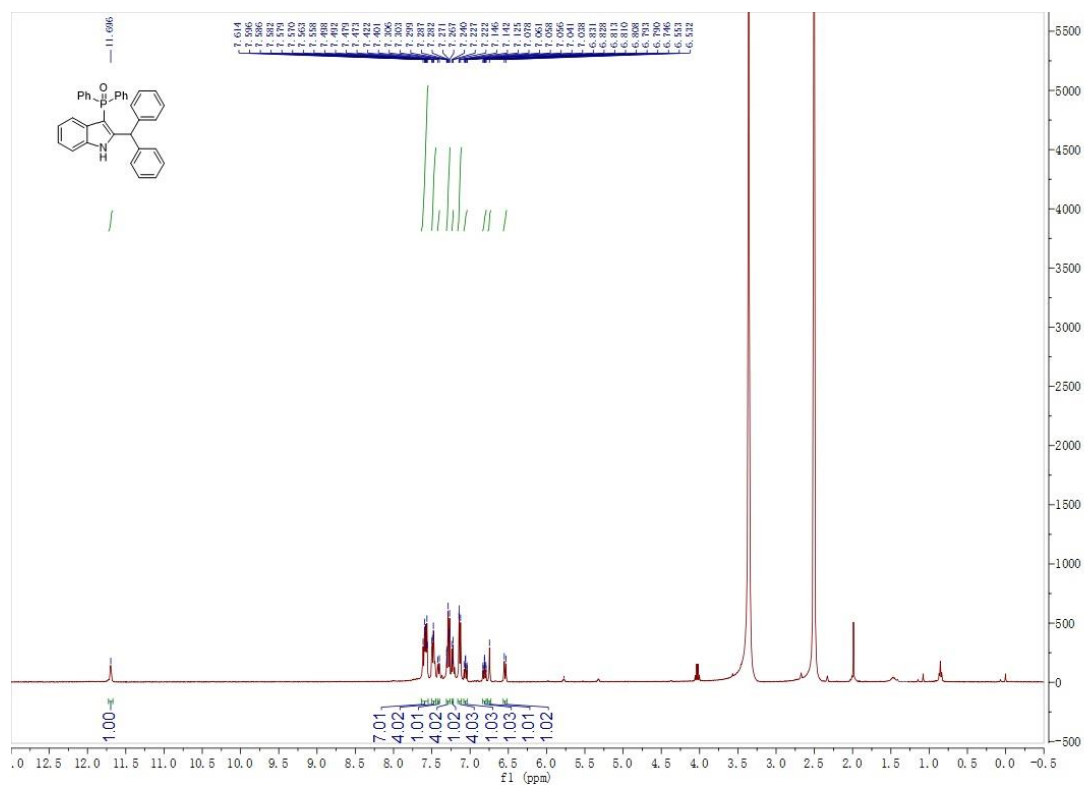

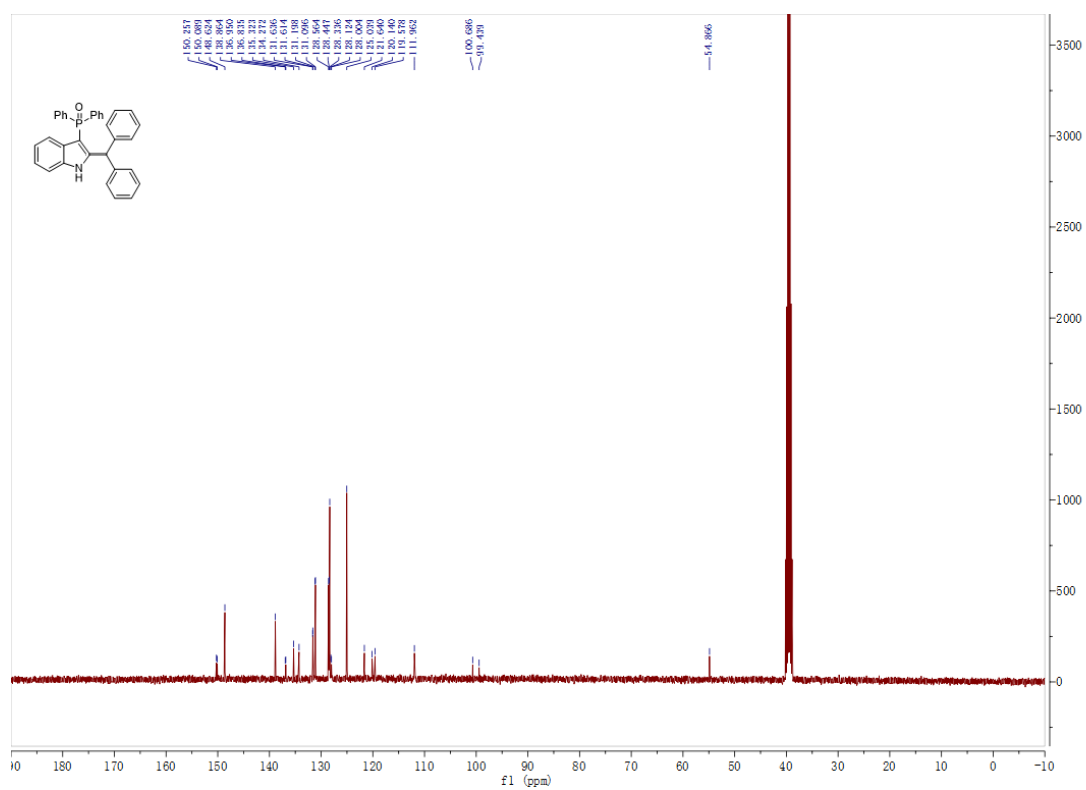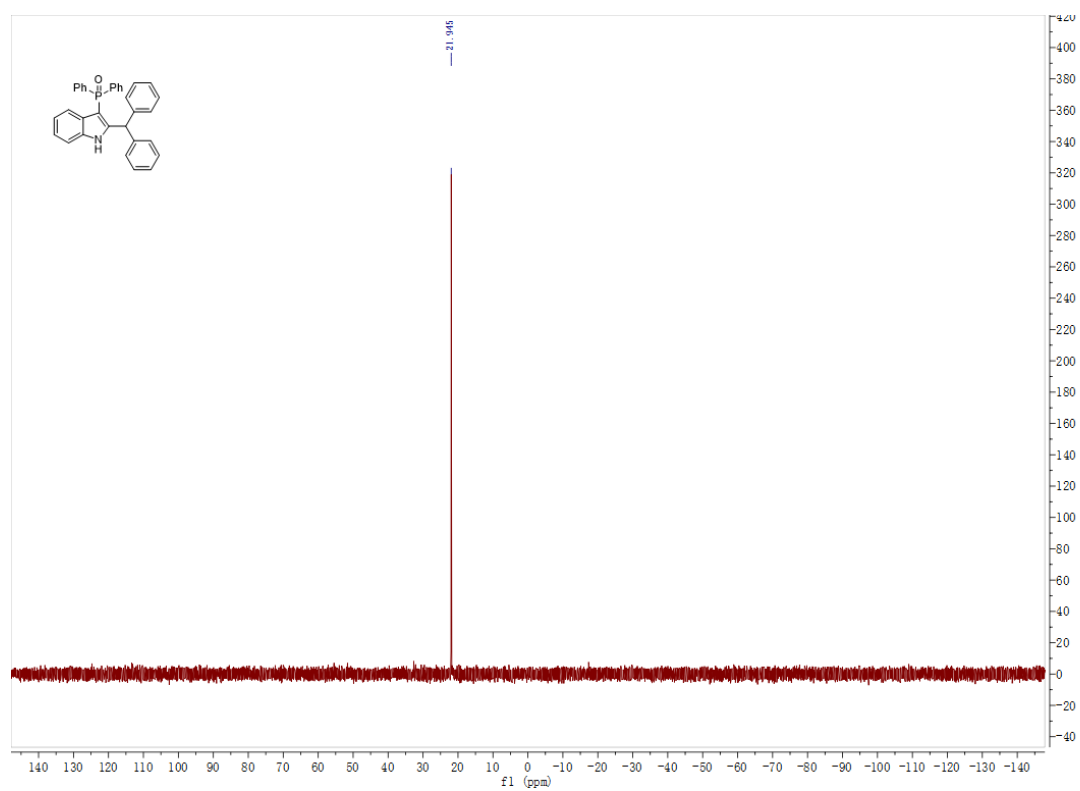

**4ba**

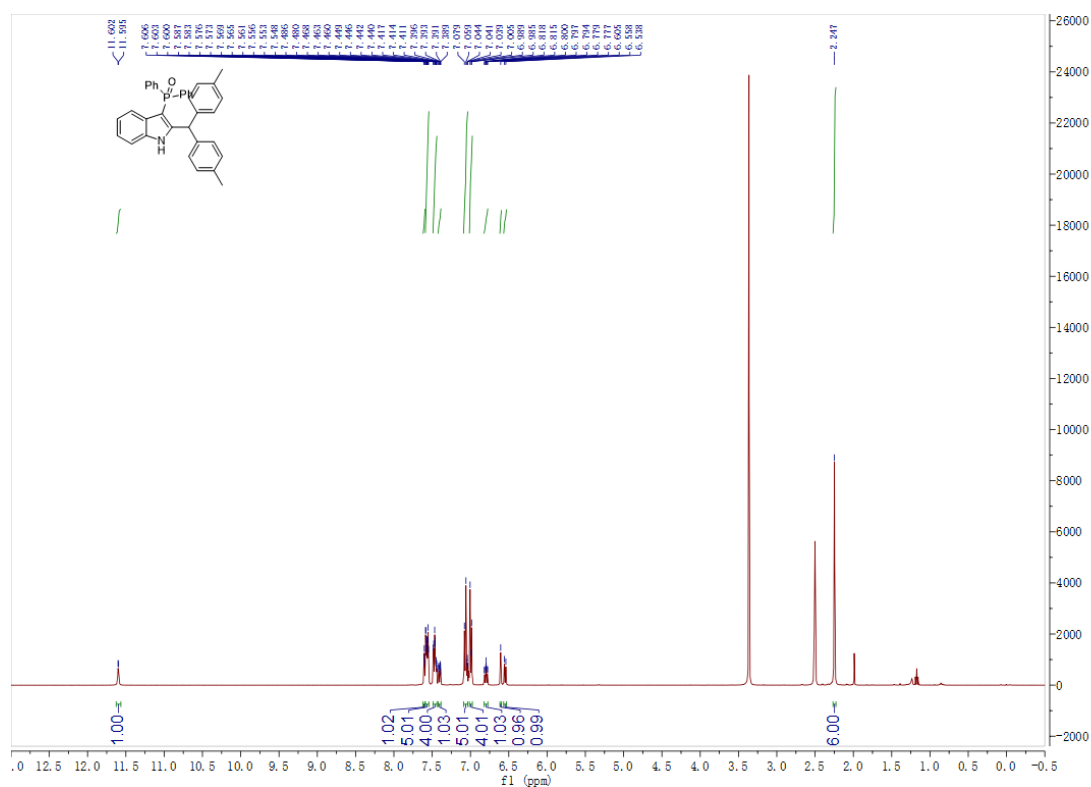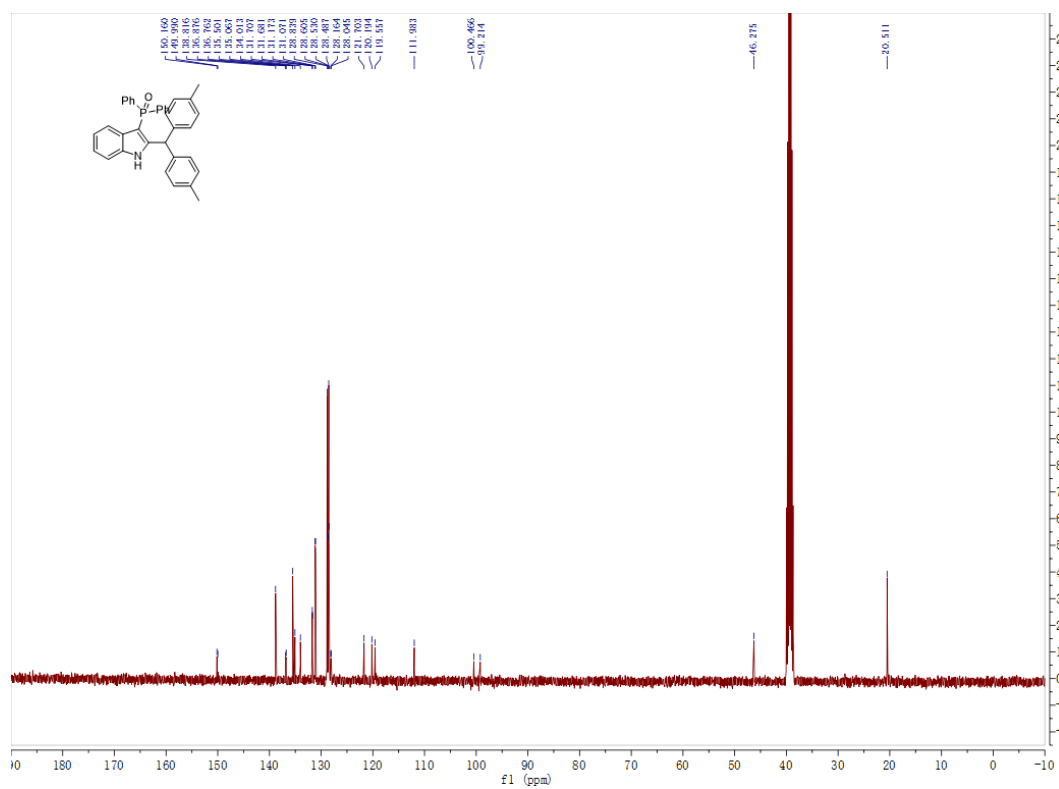



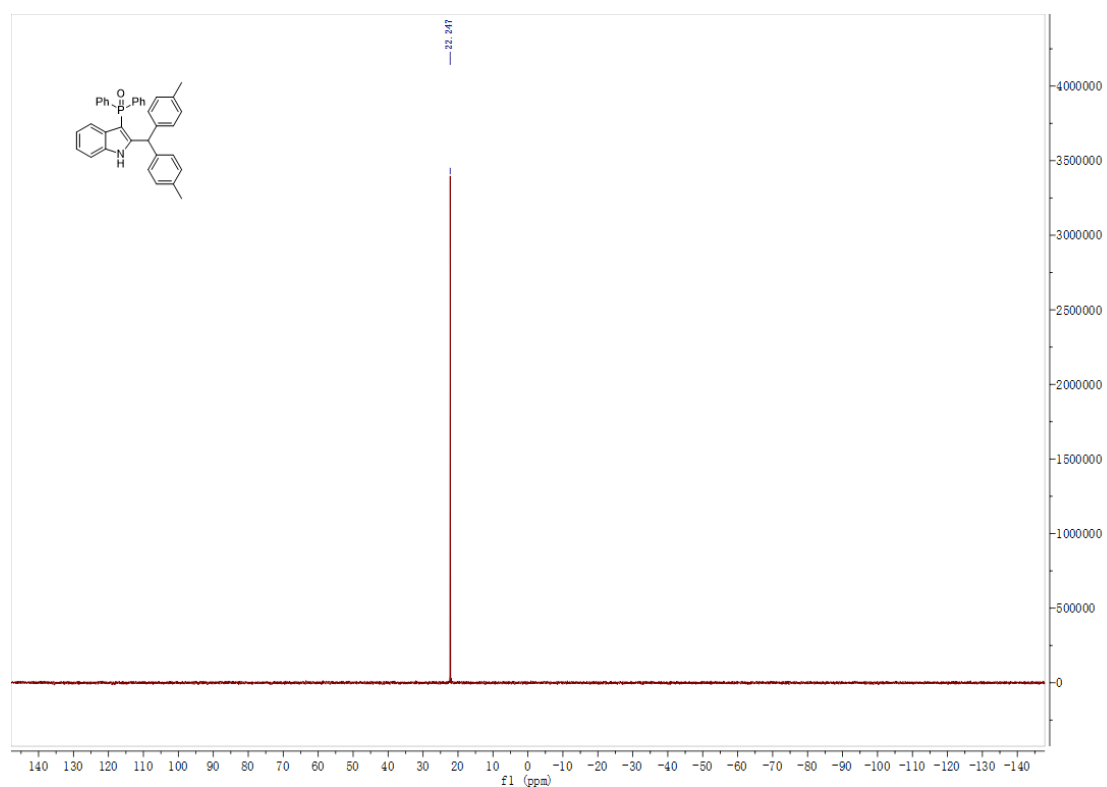

4ca

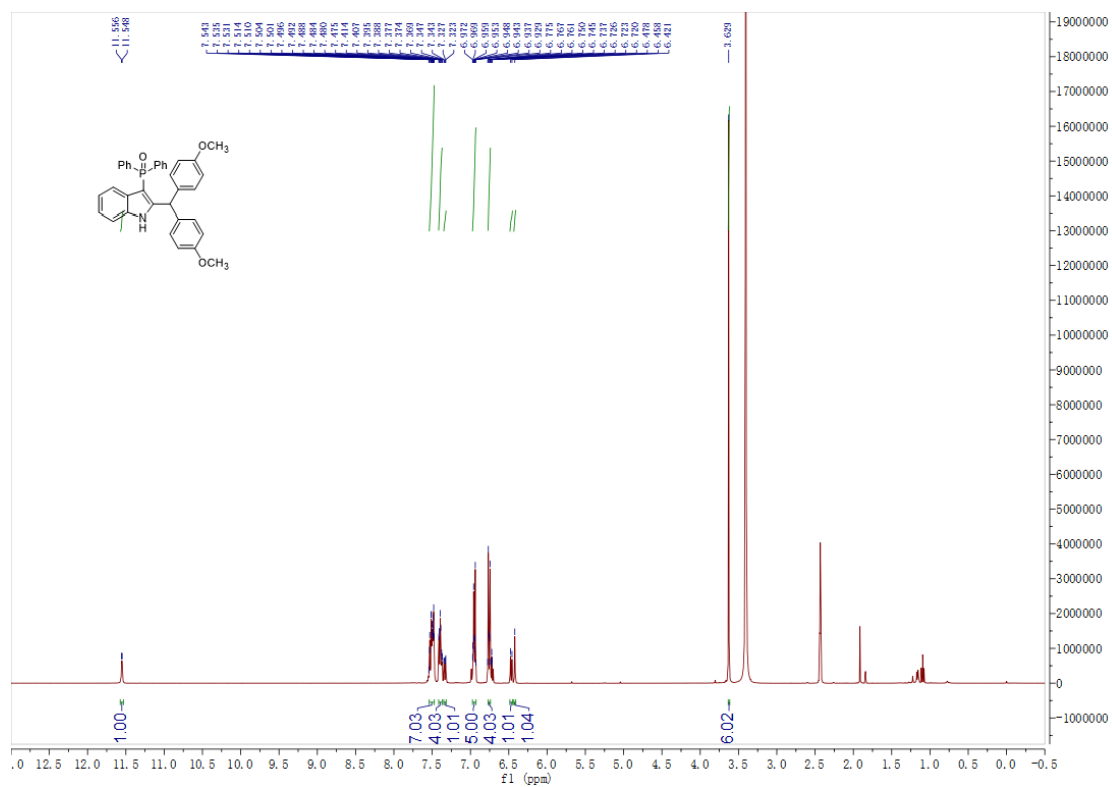

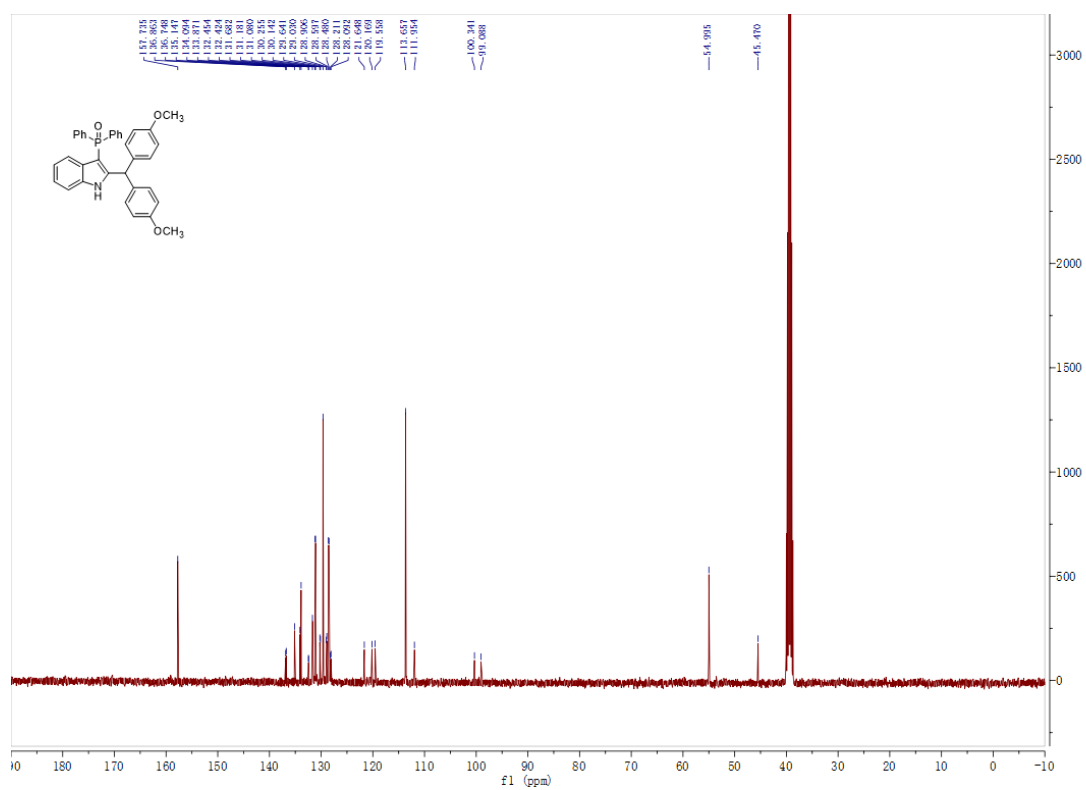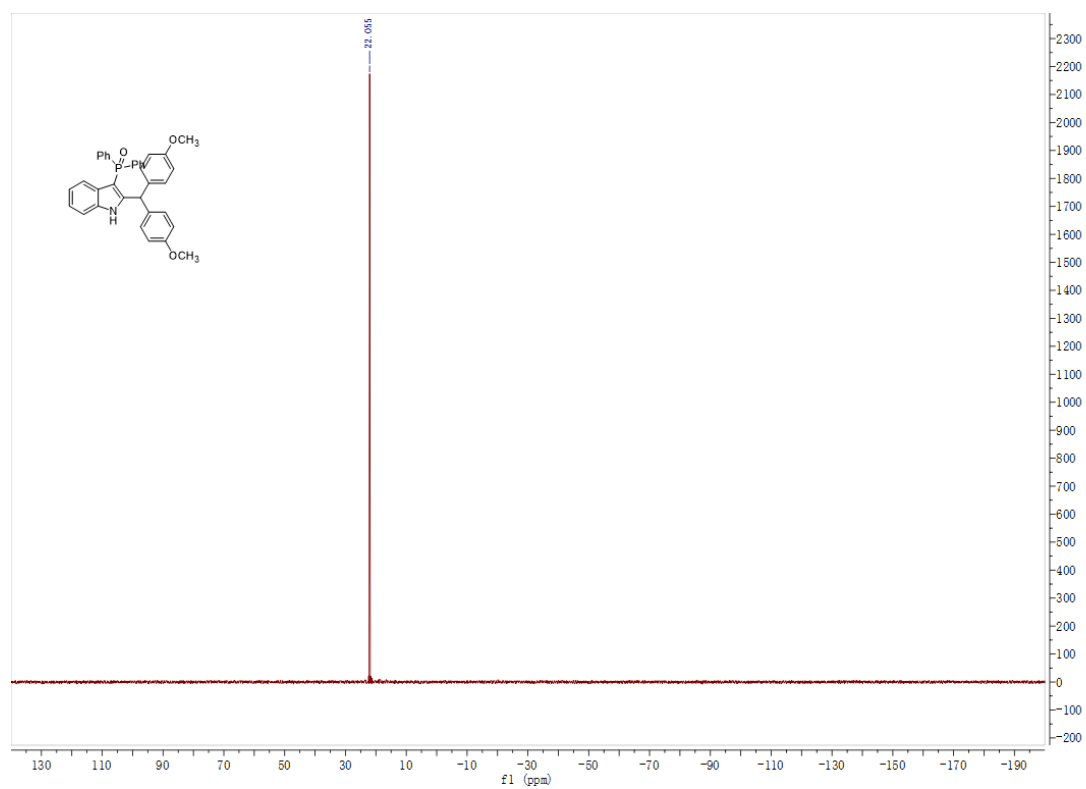

**4da**

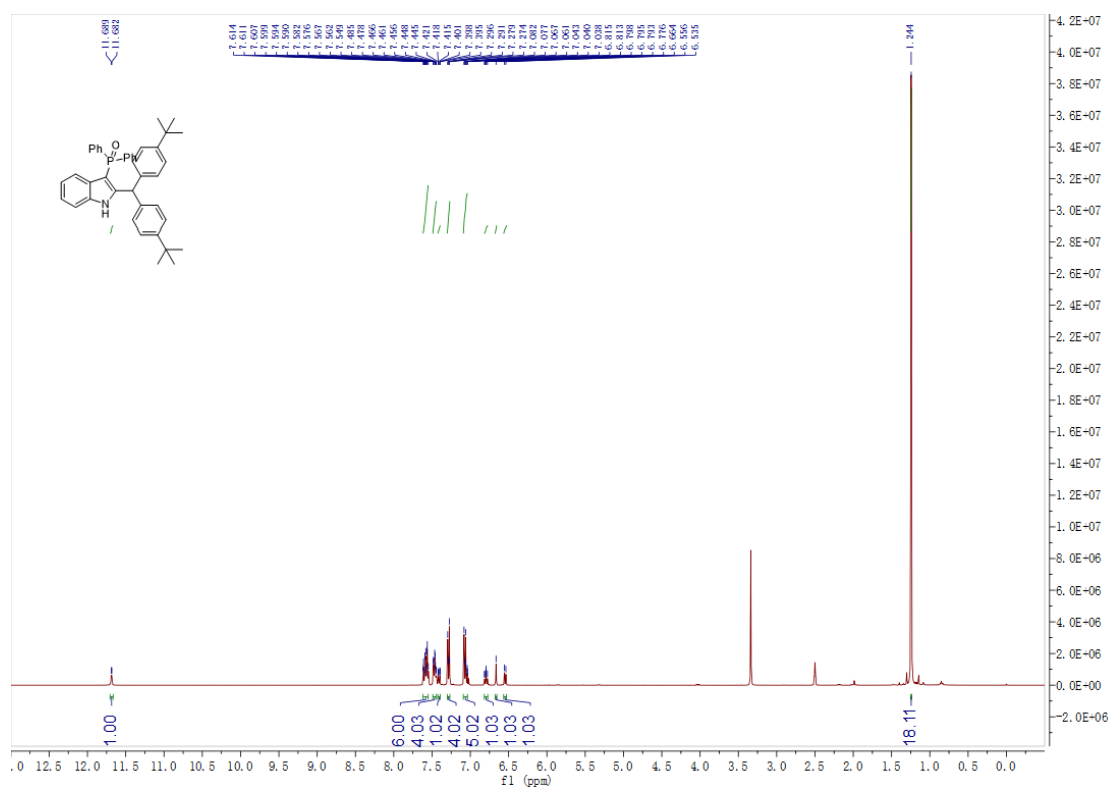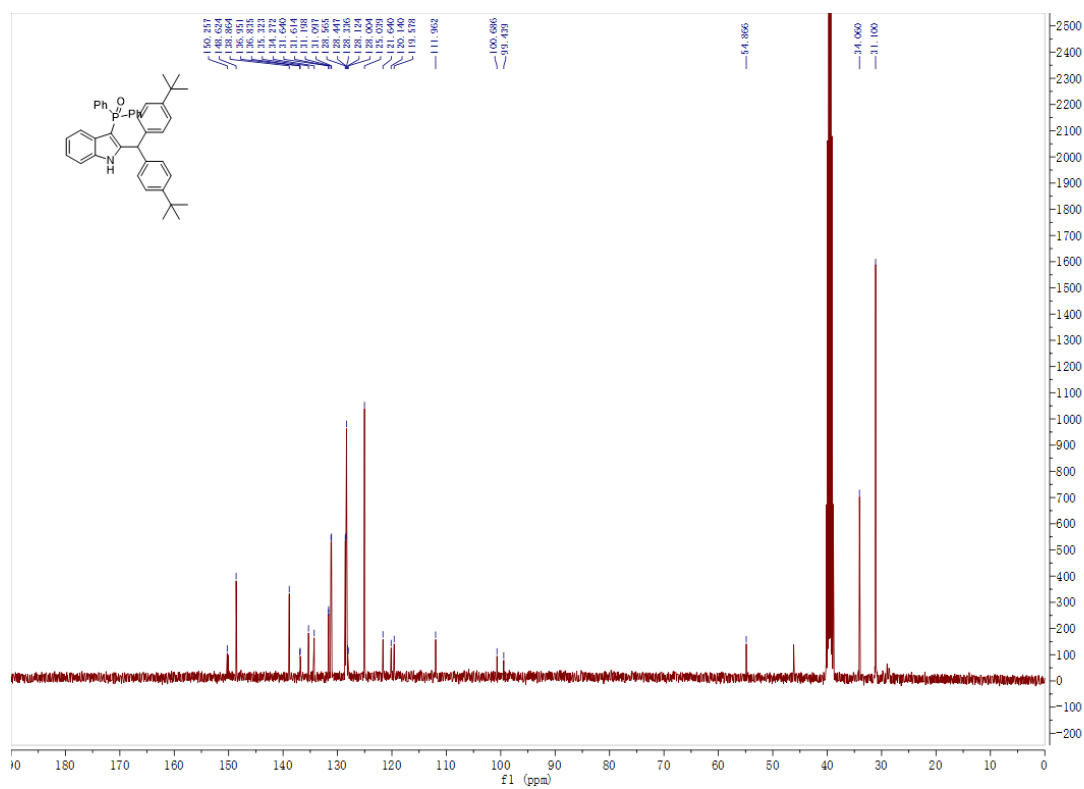

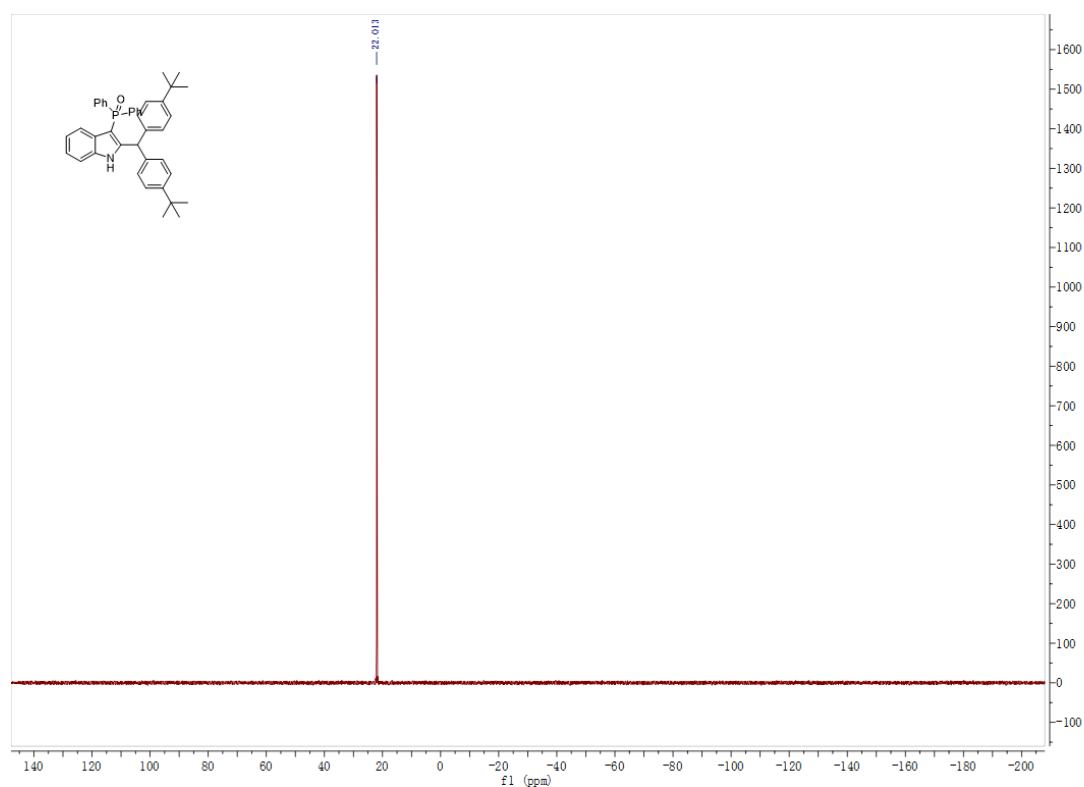

4ea

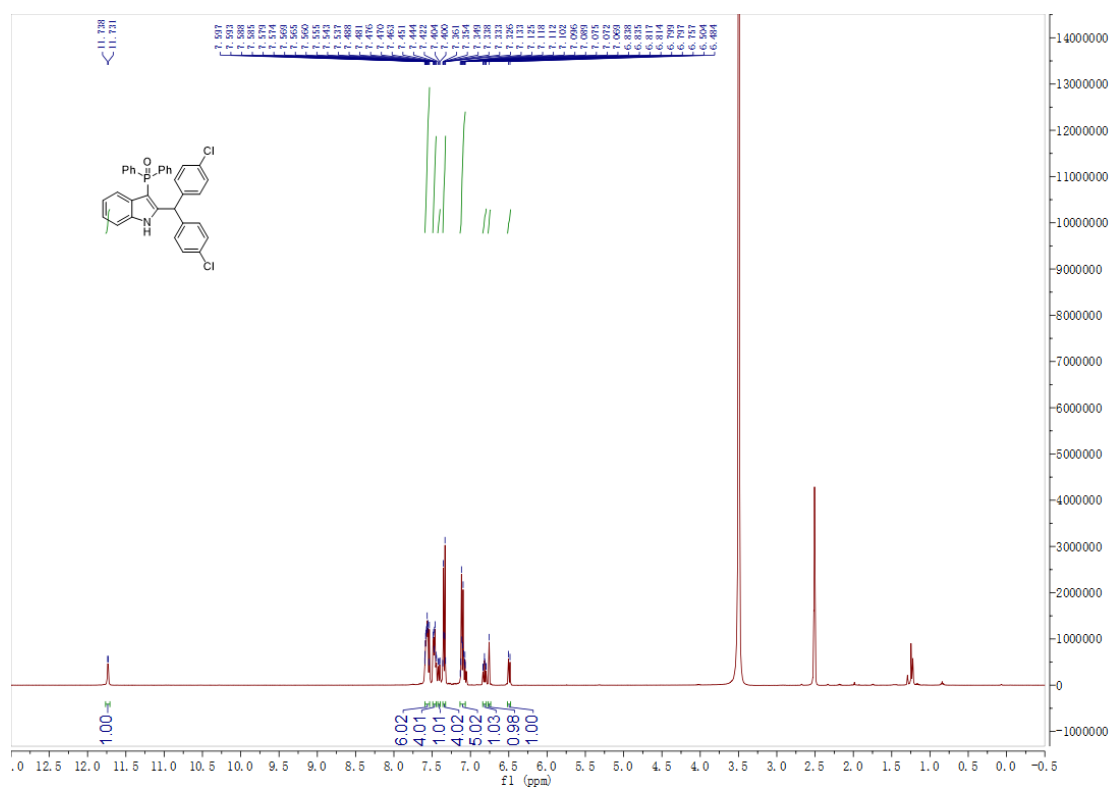

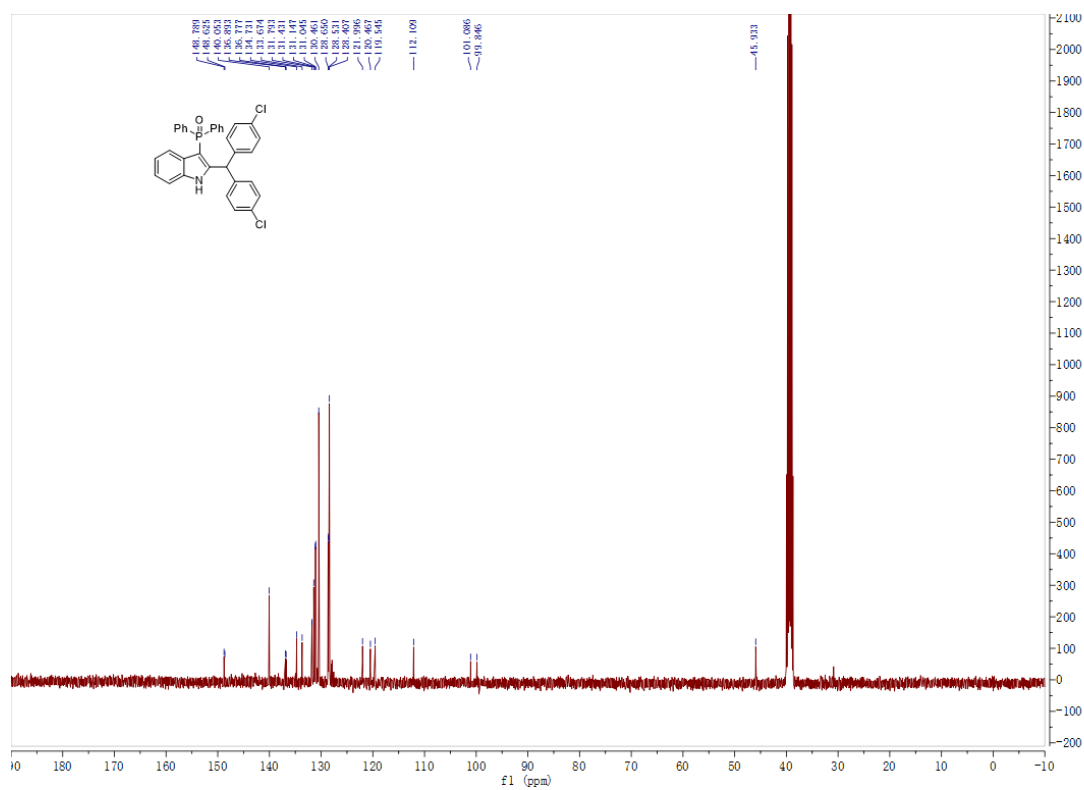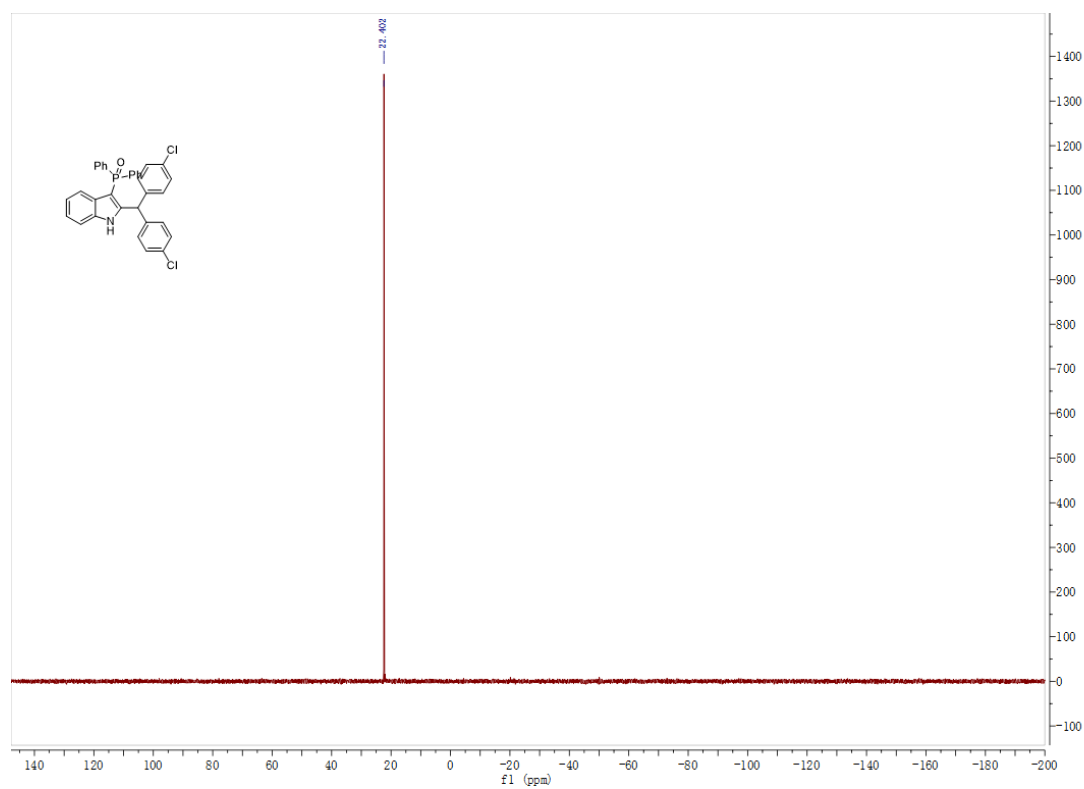

**4fa**

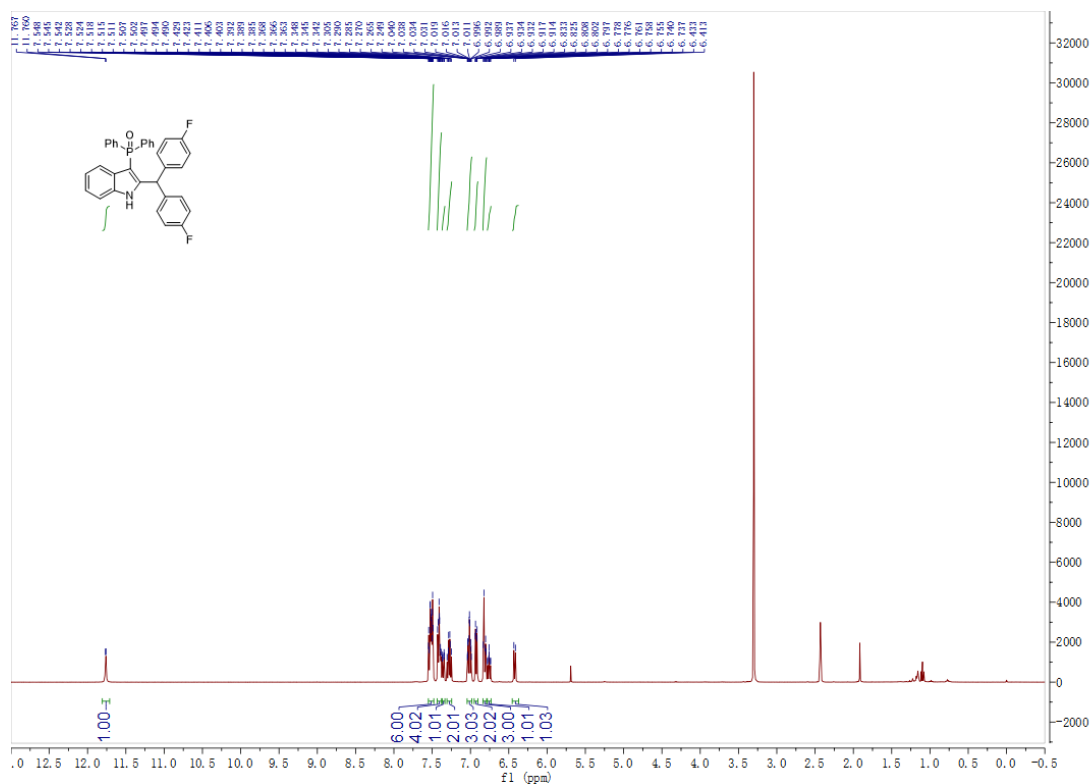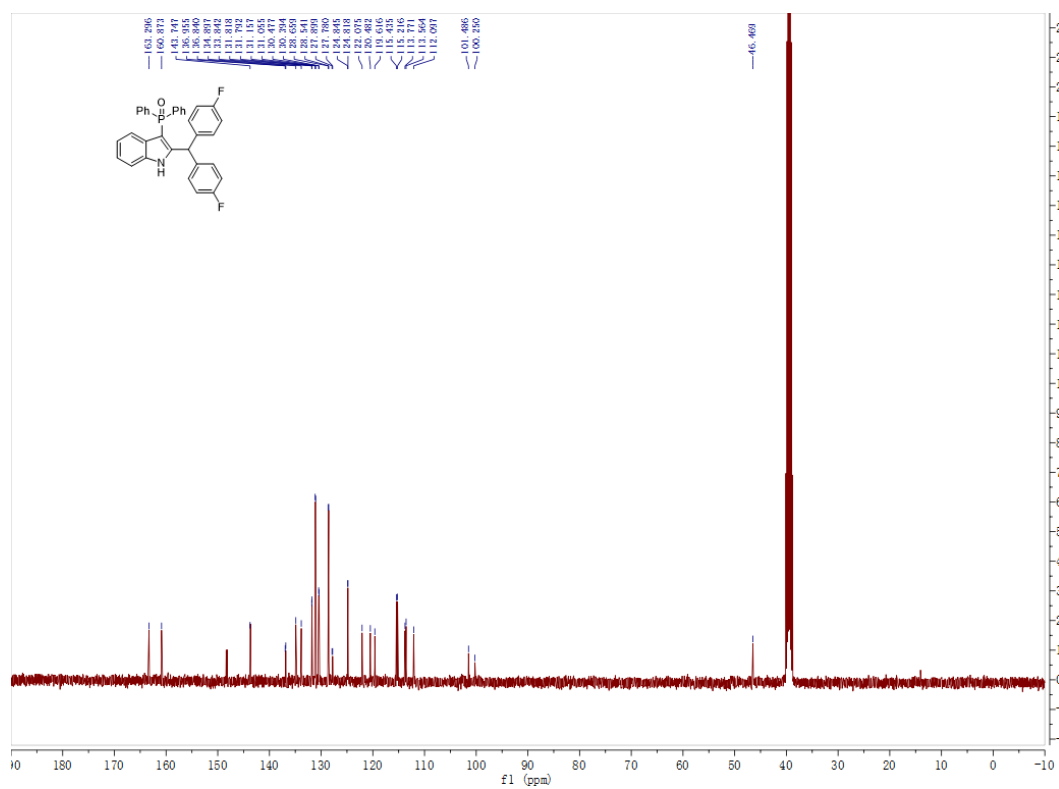

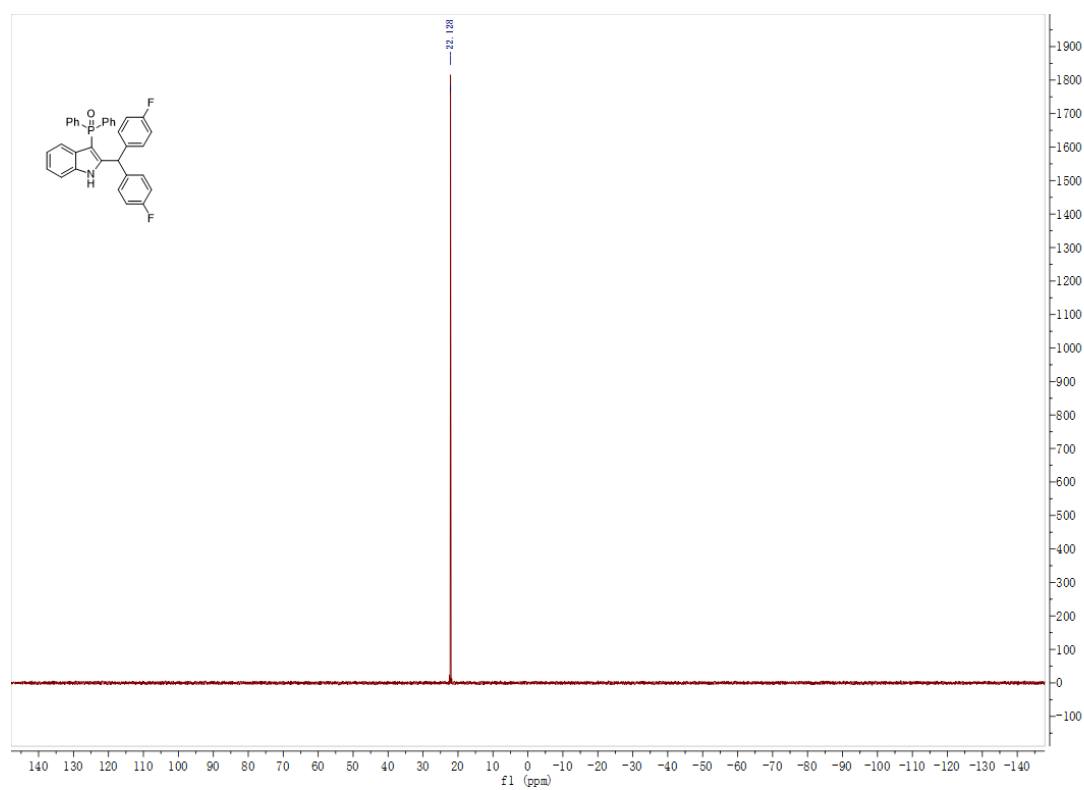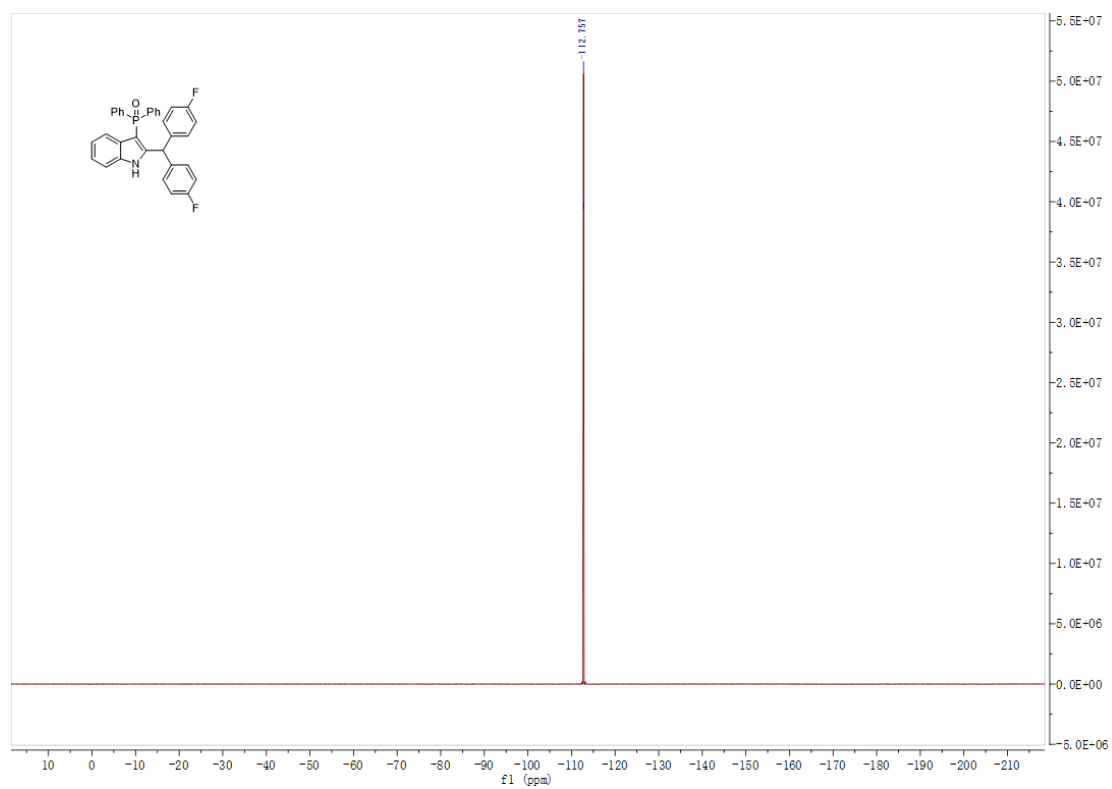

**4ga**

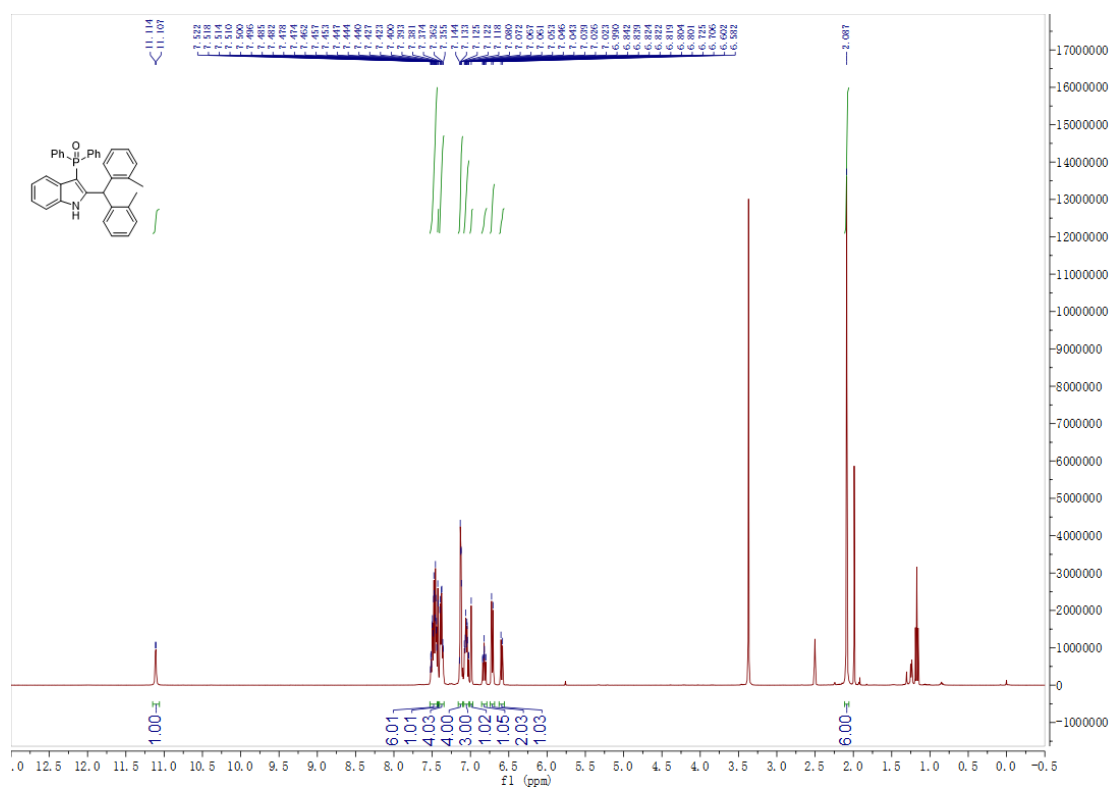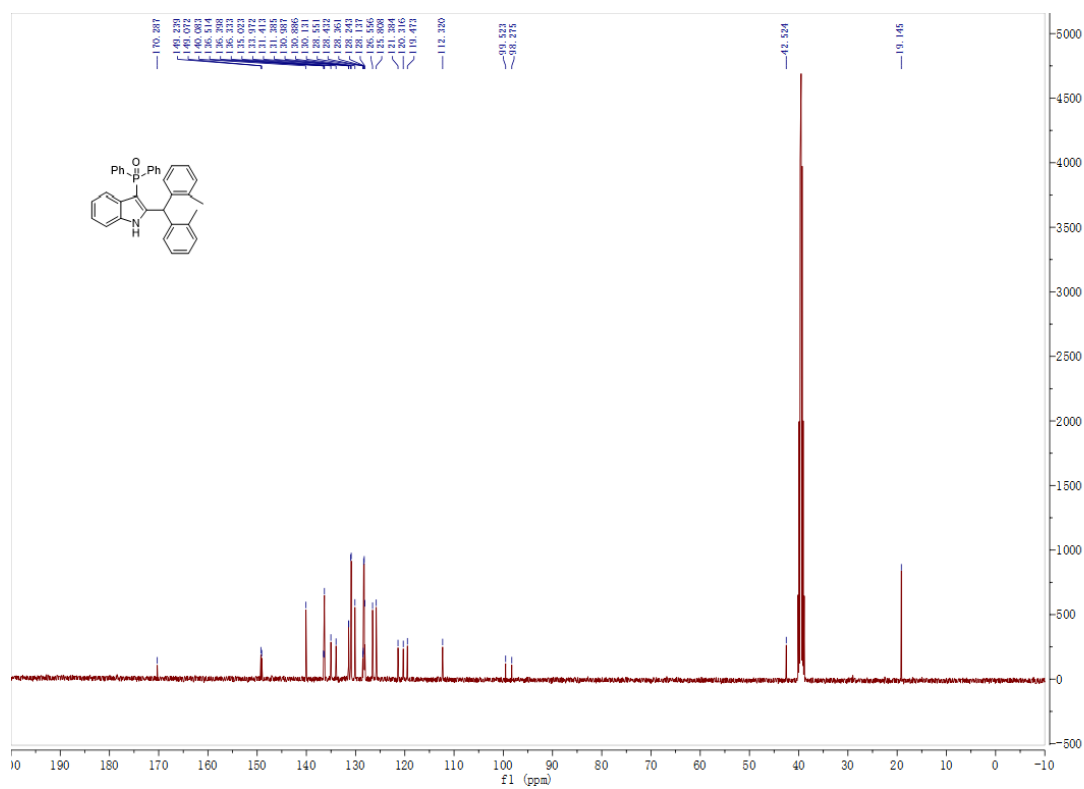



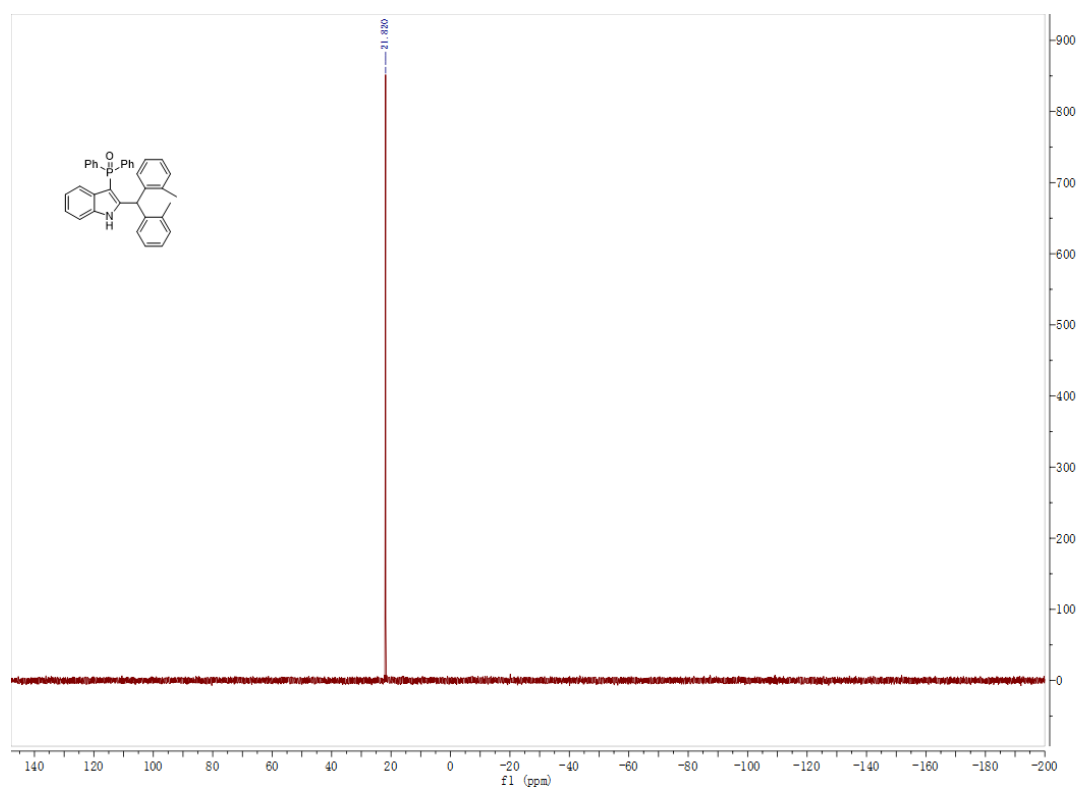

**4ha**

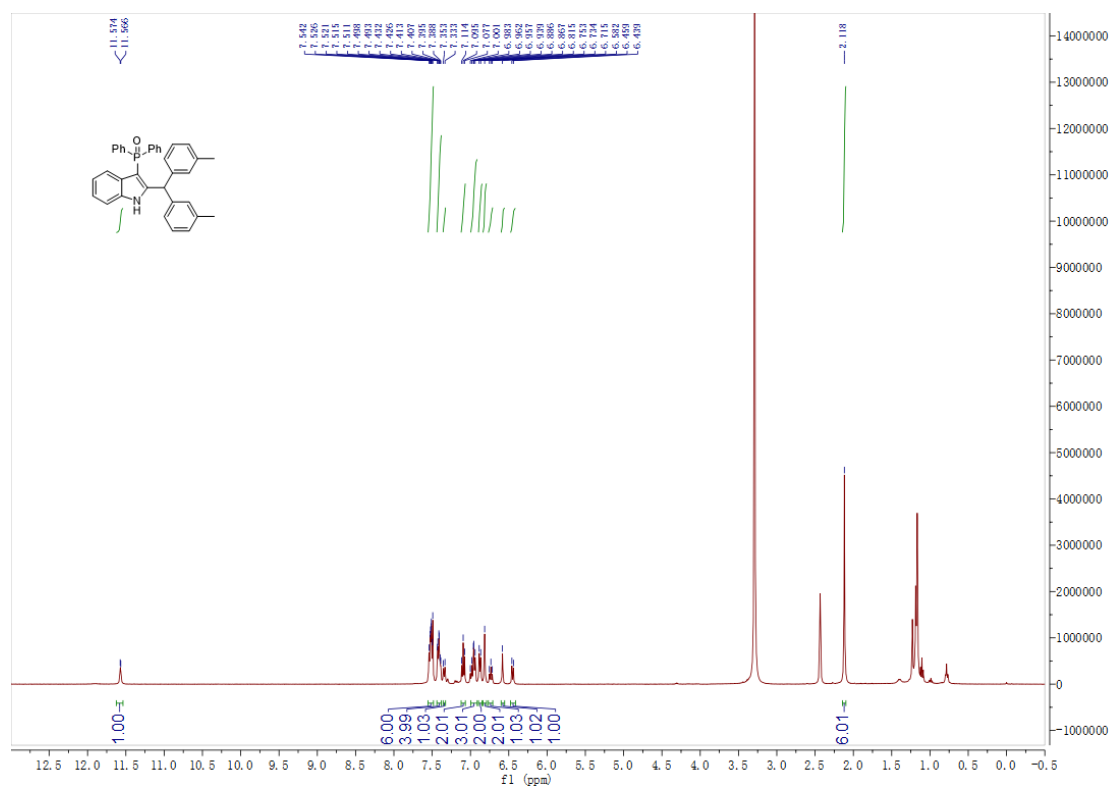

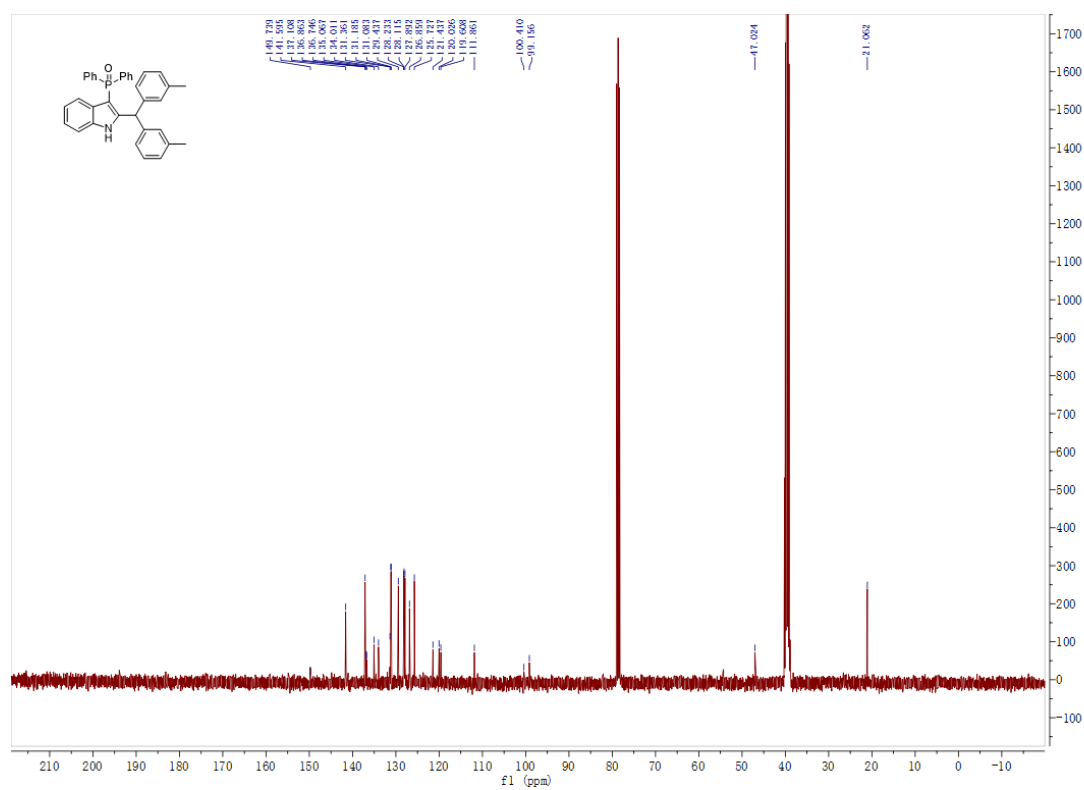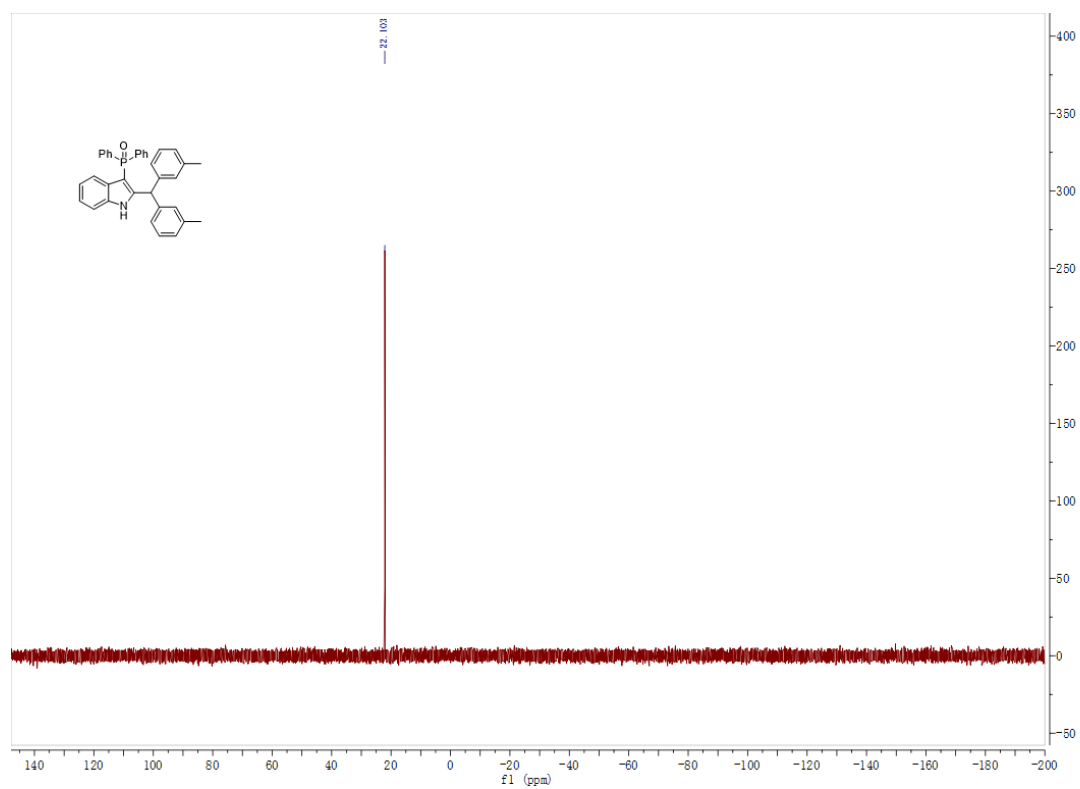

4ia

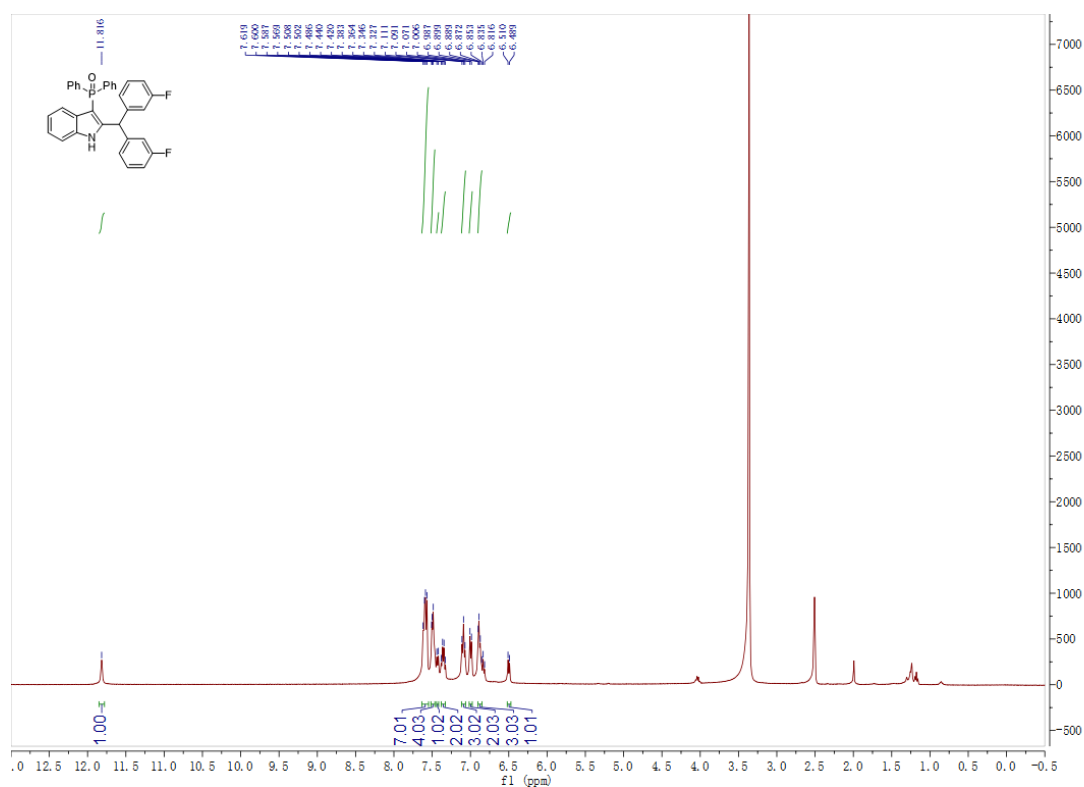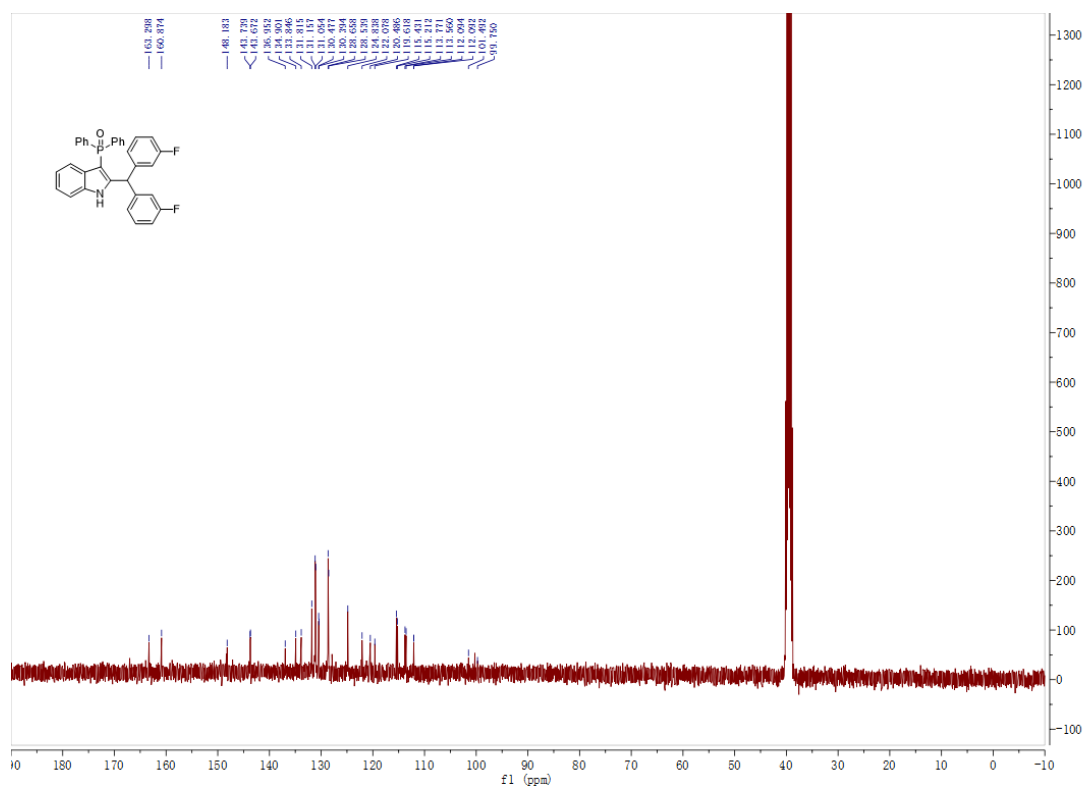

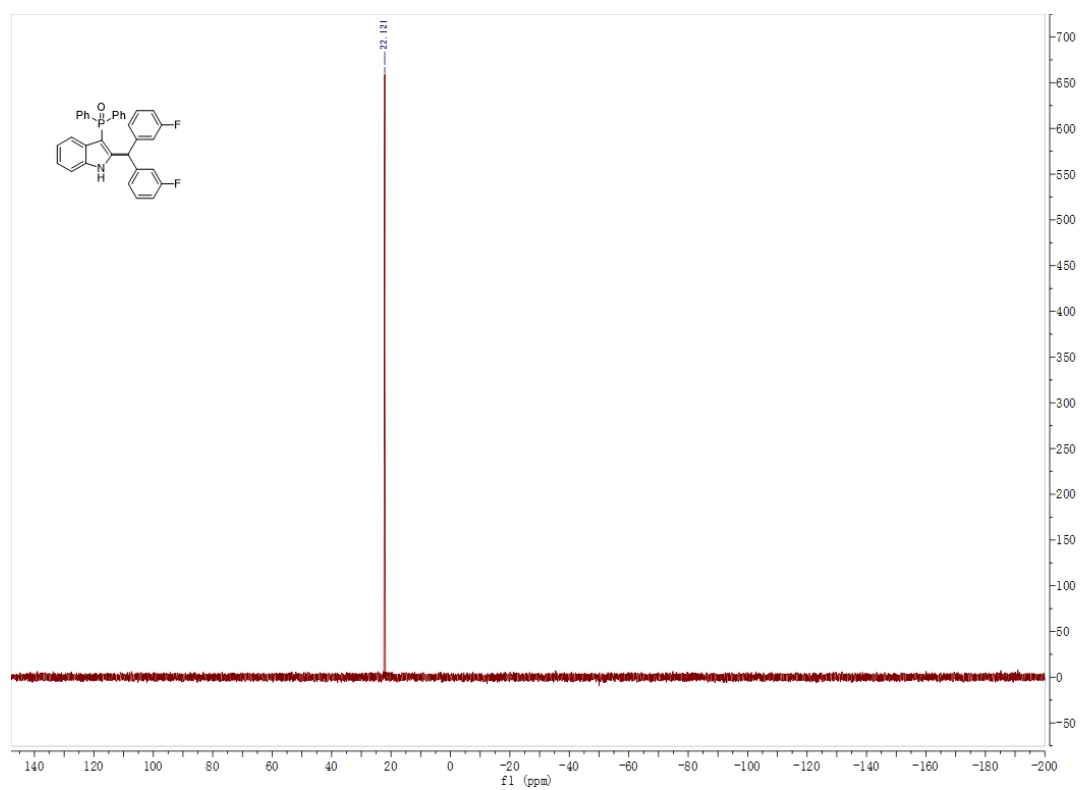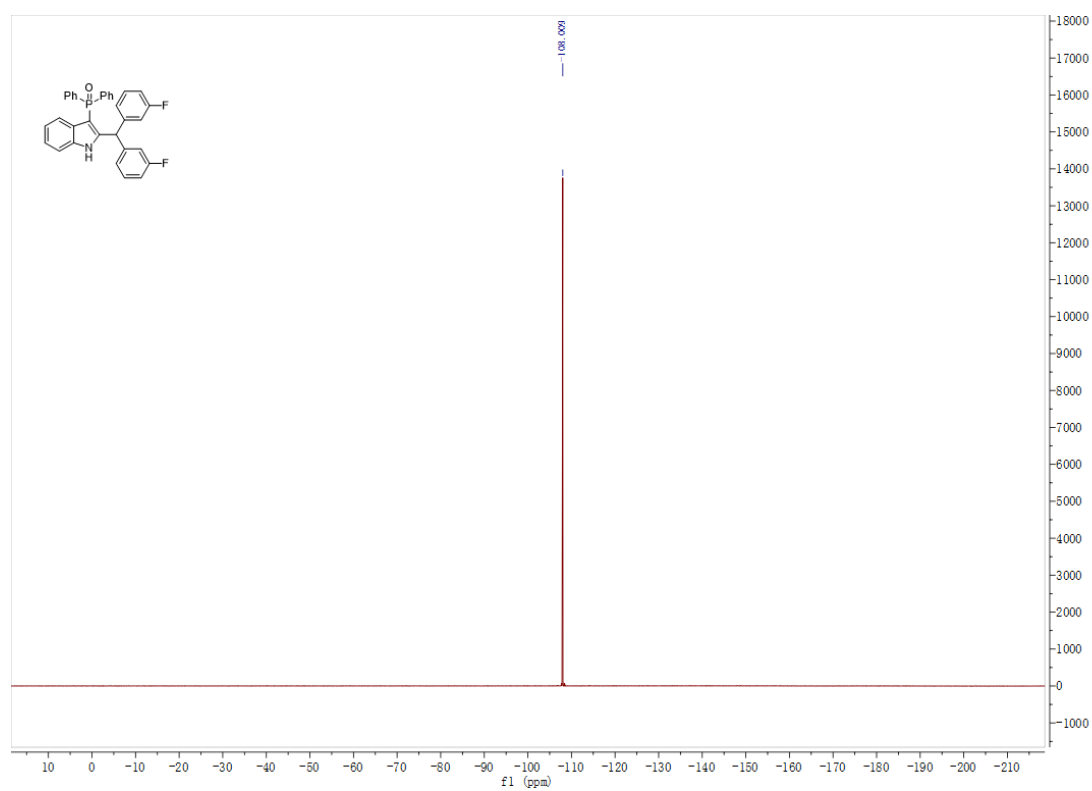

**4ja**

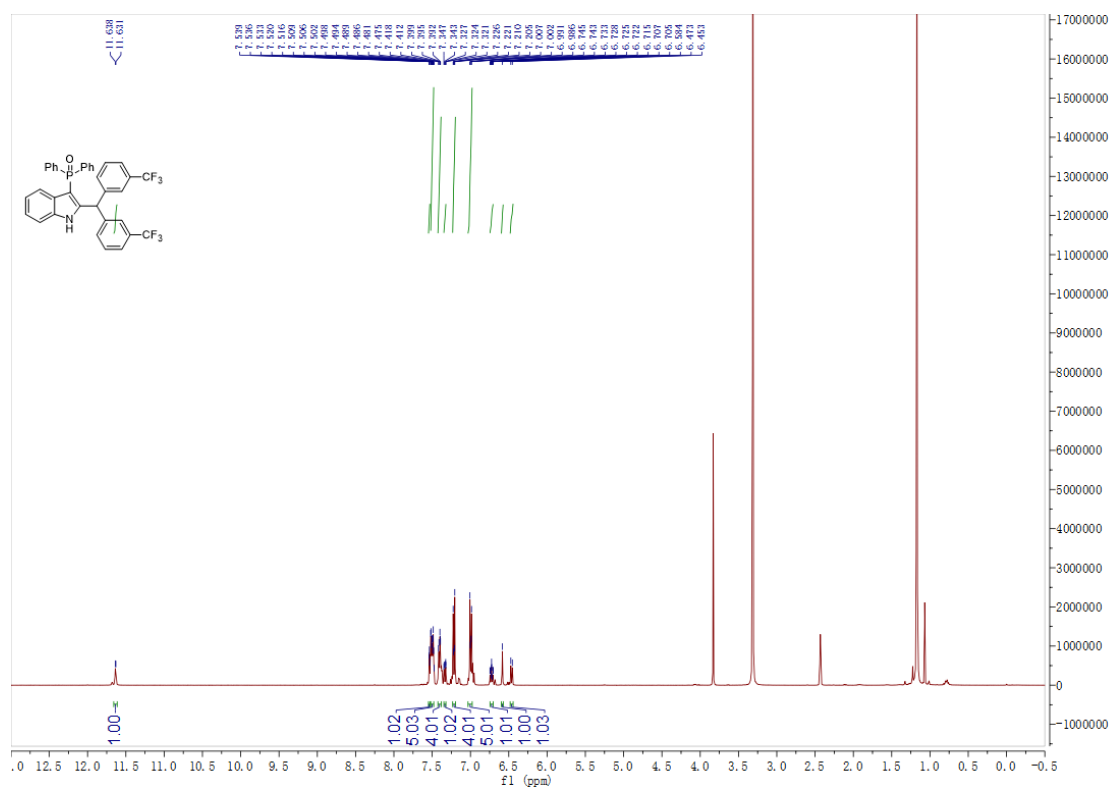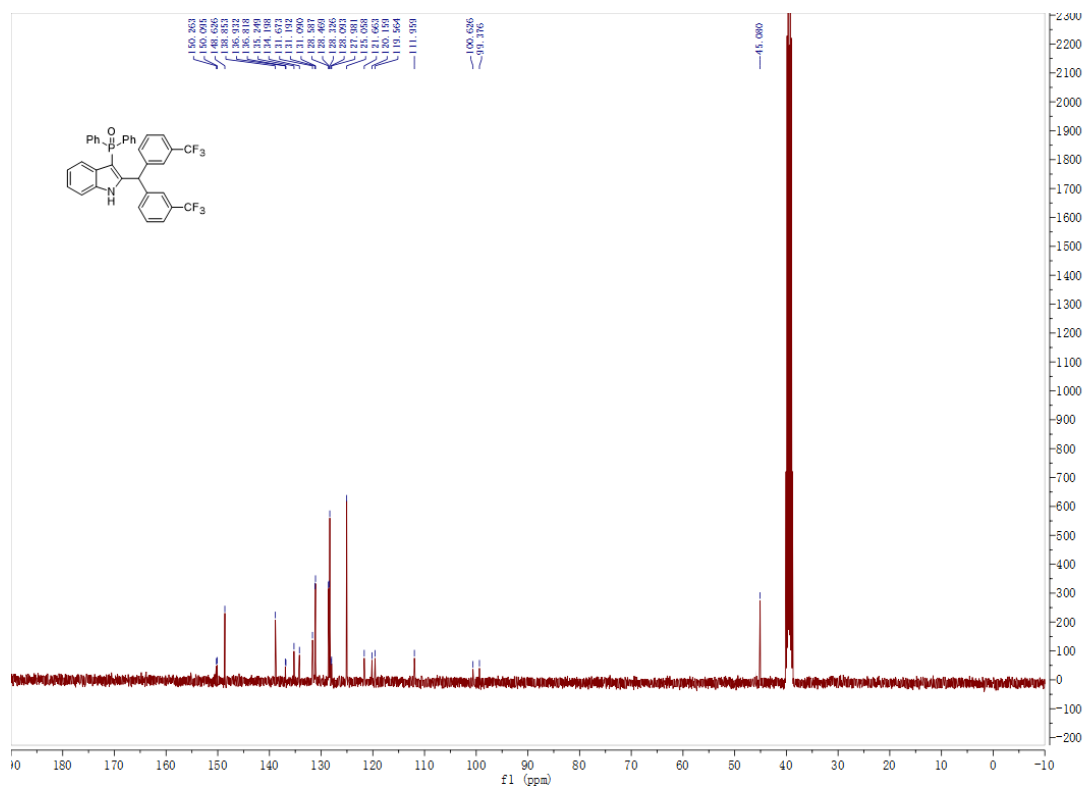

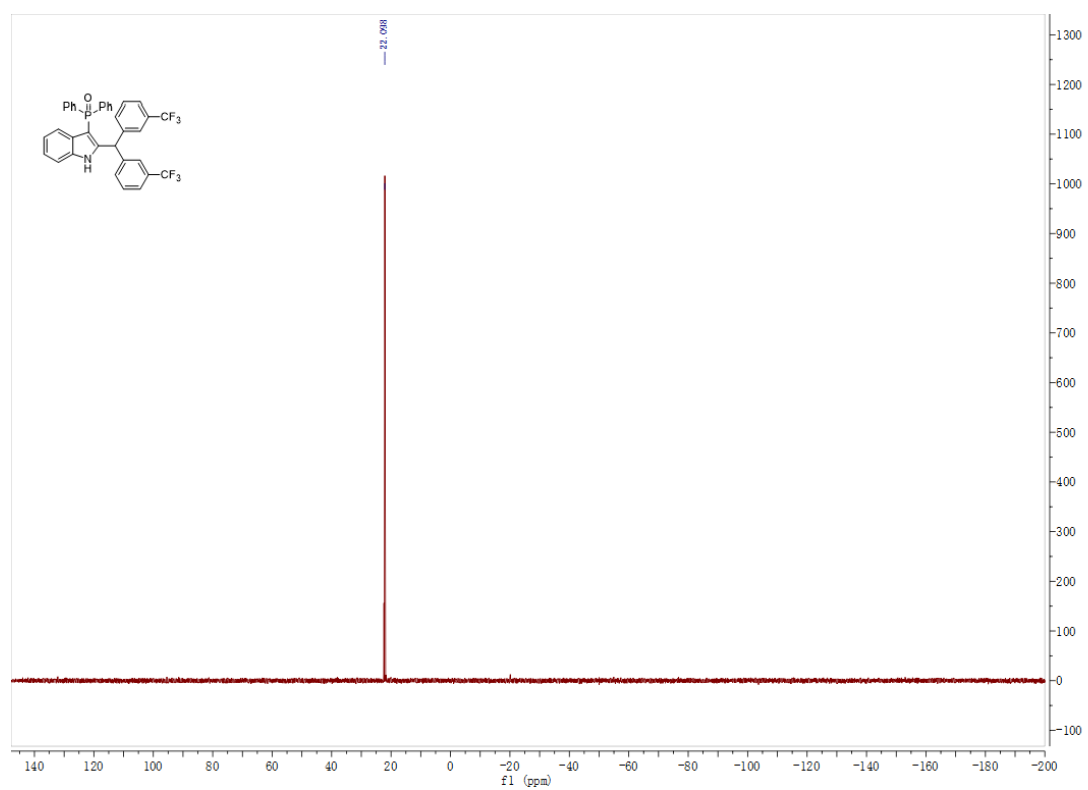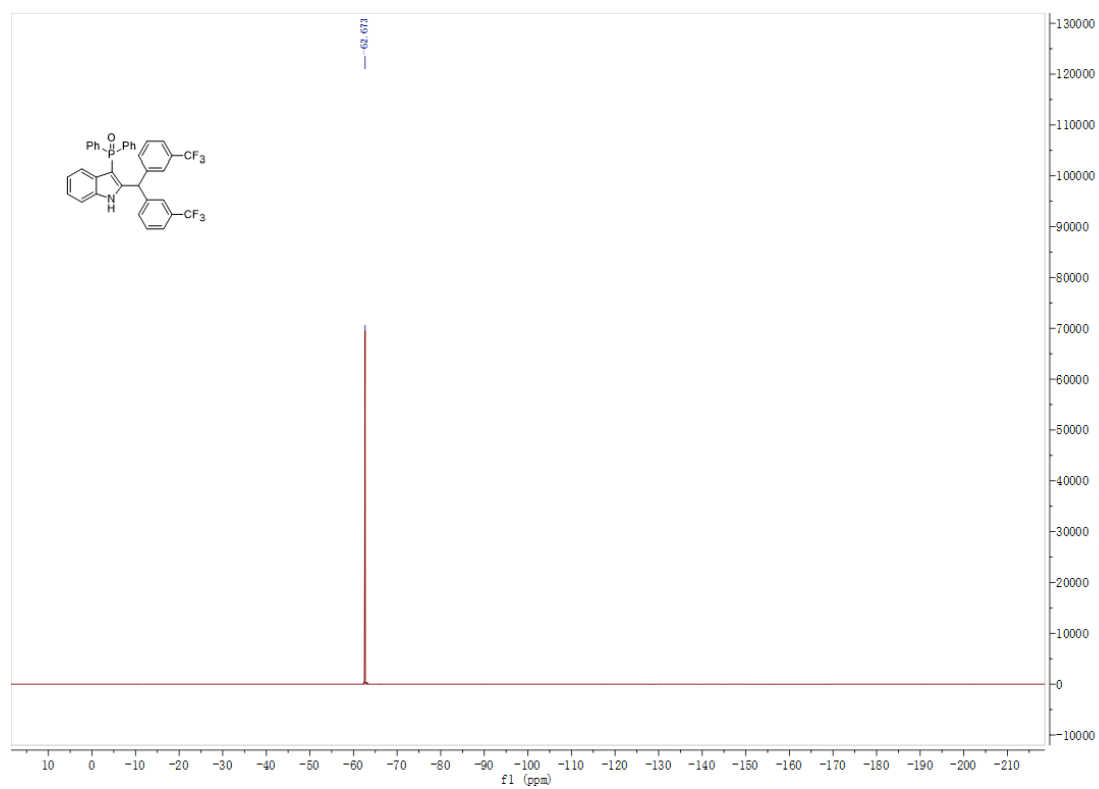

**4ka**

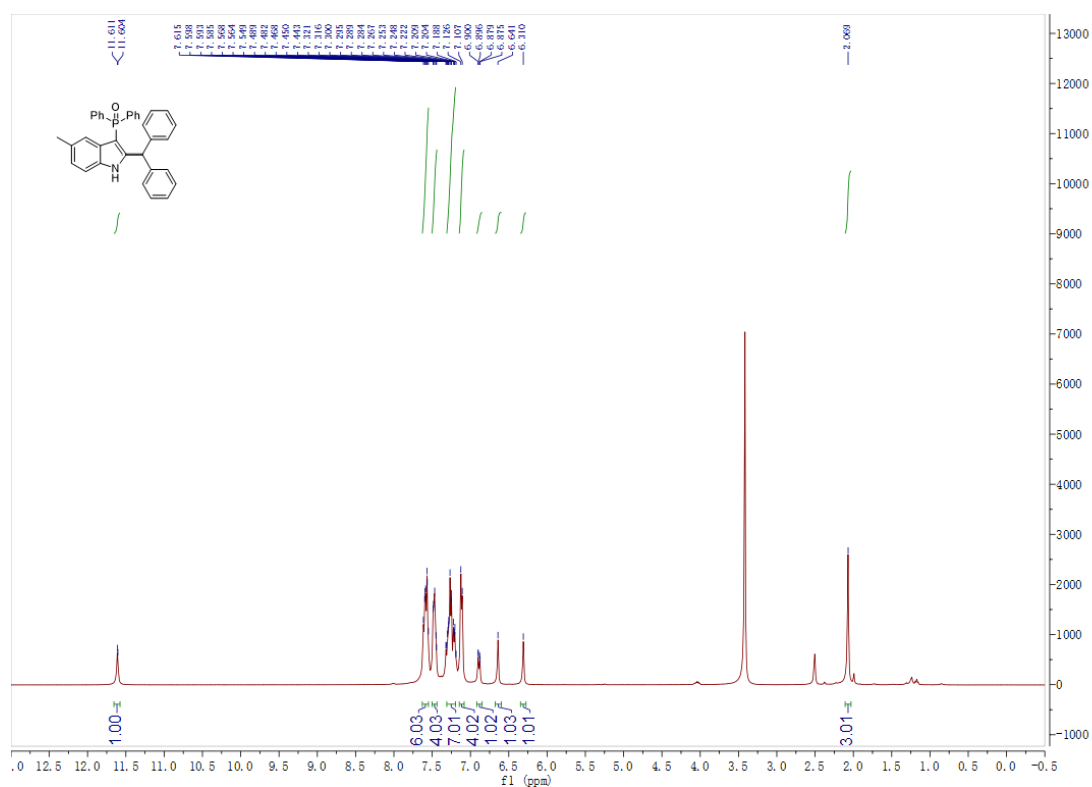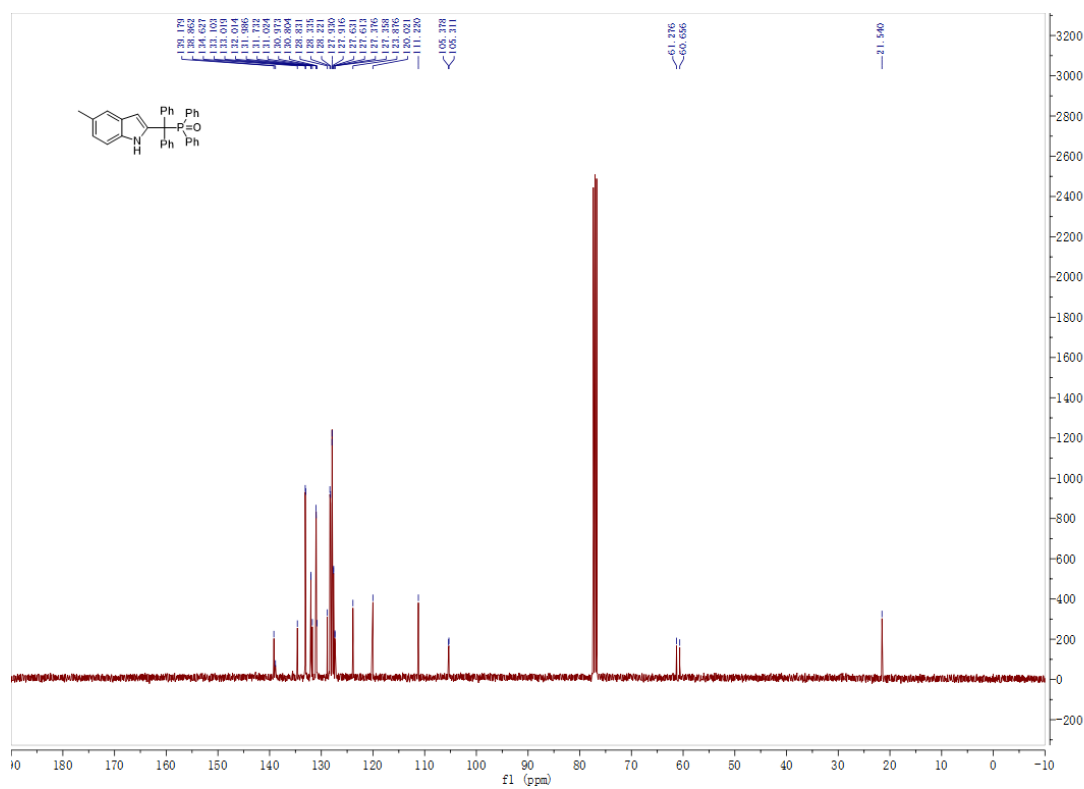

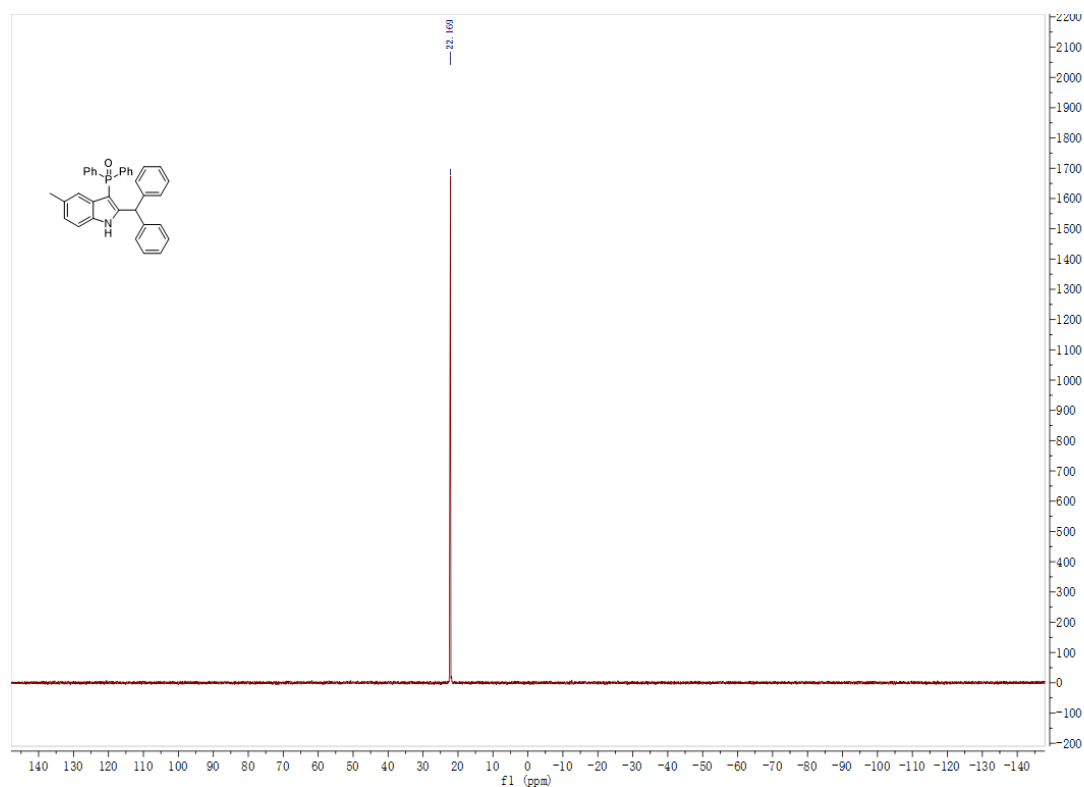

4la

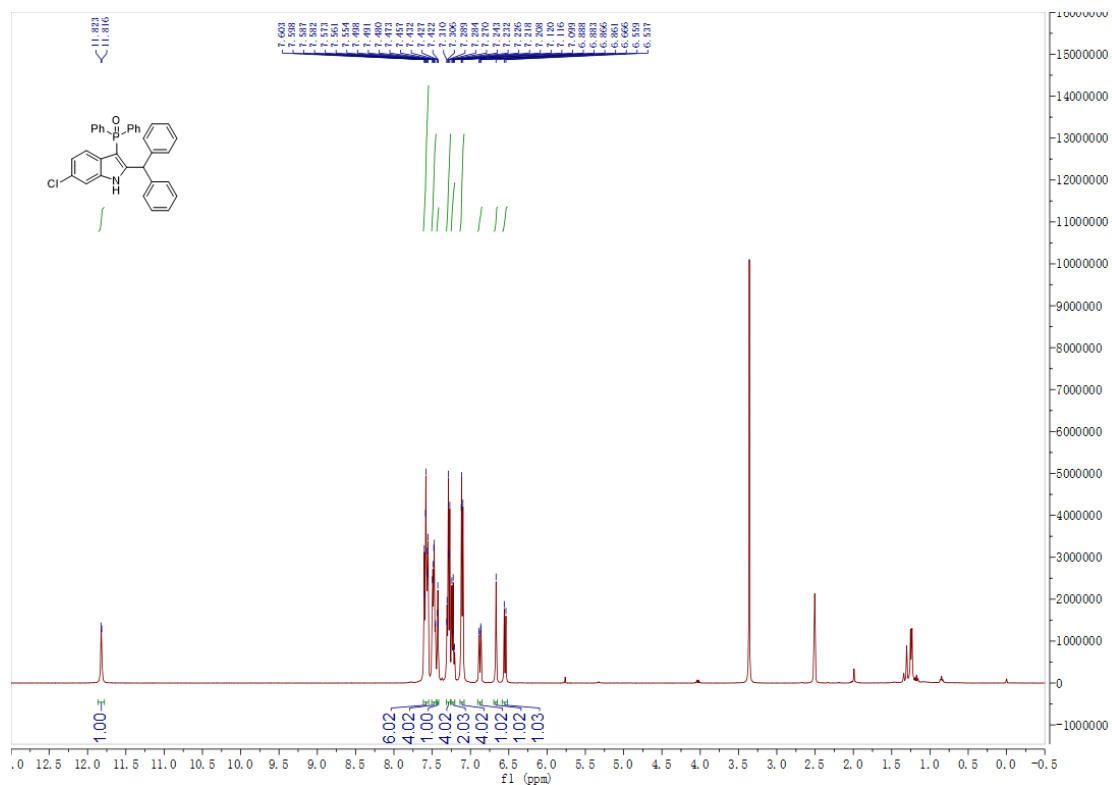



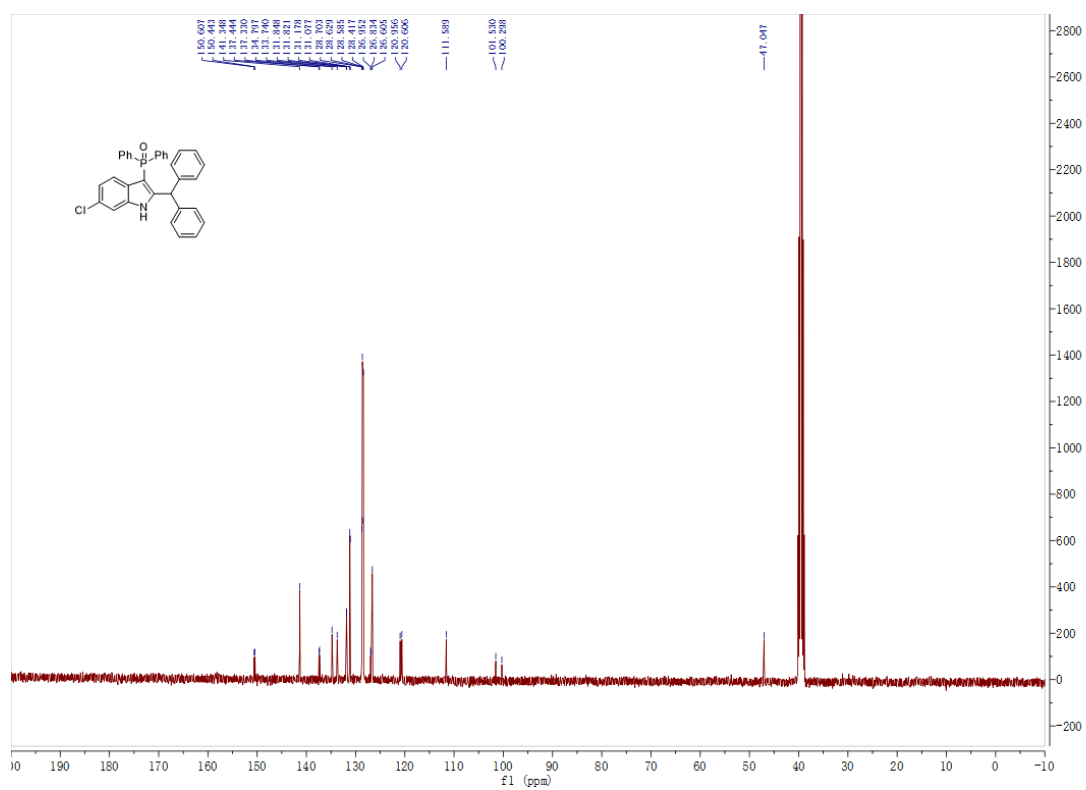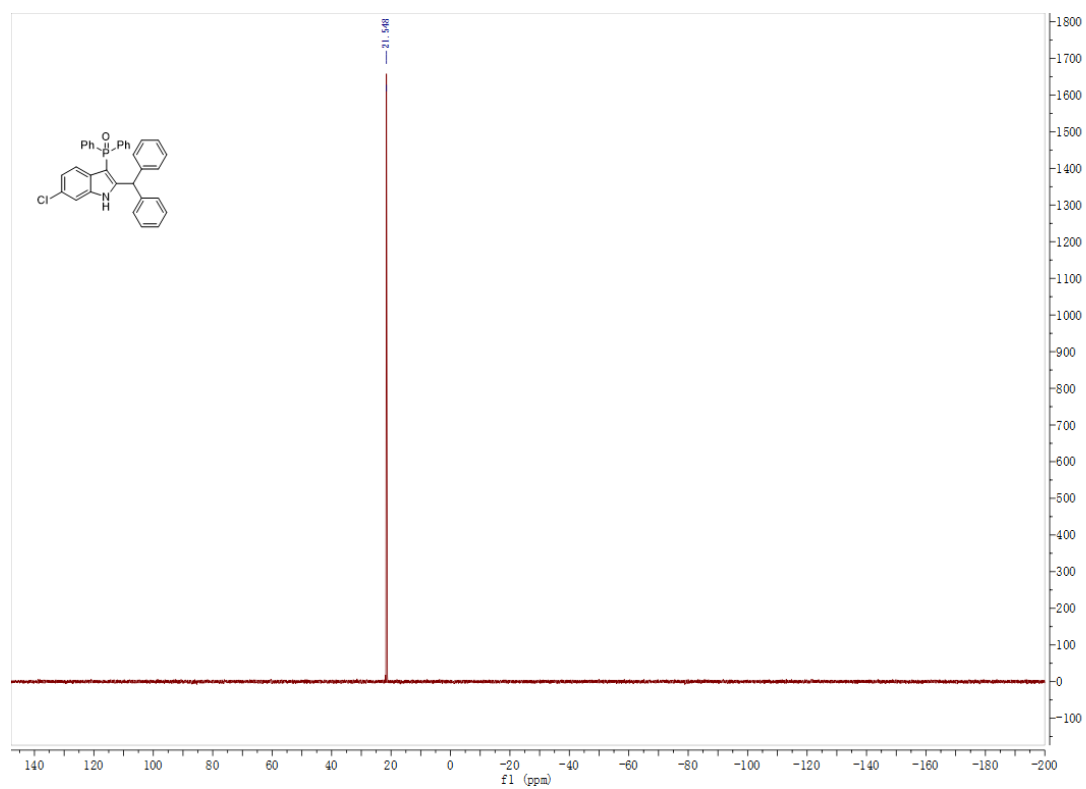

**4ab**

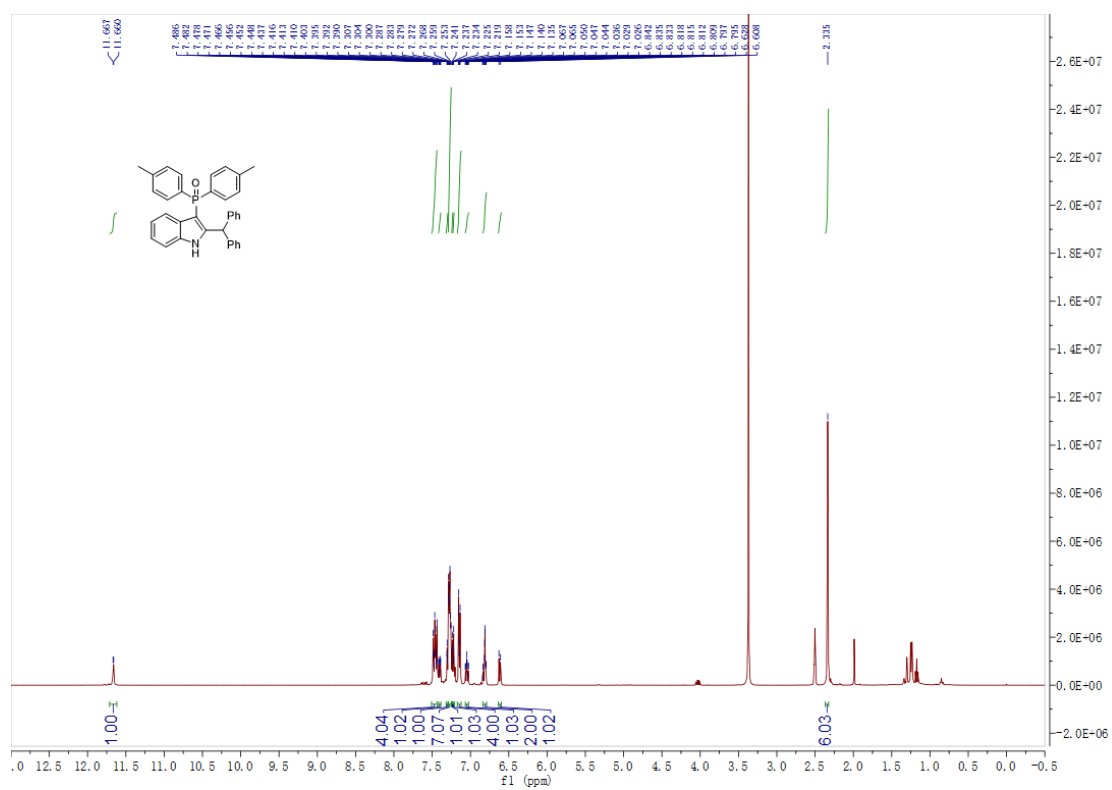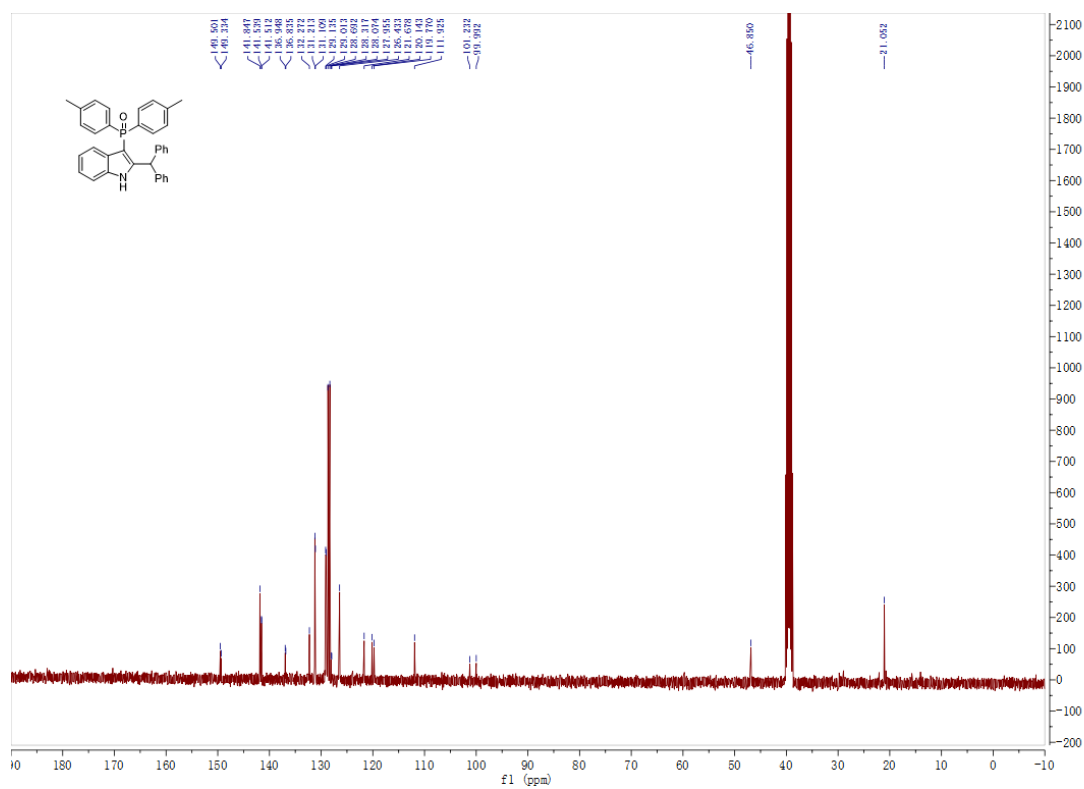

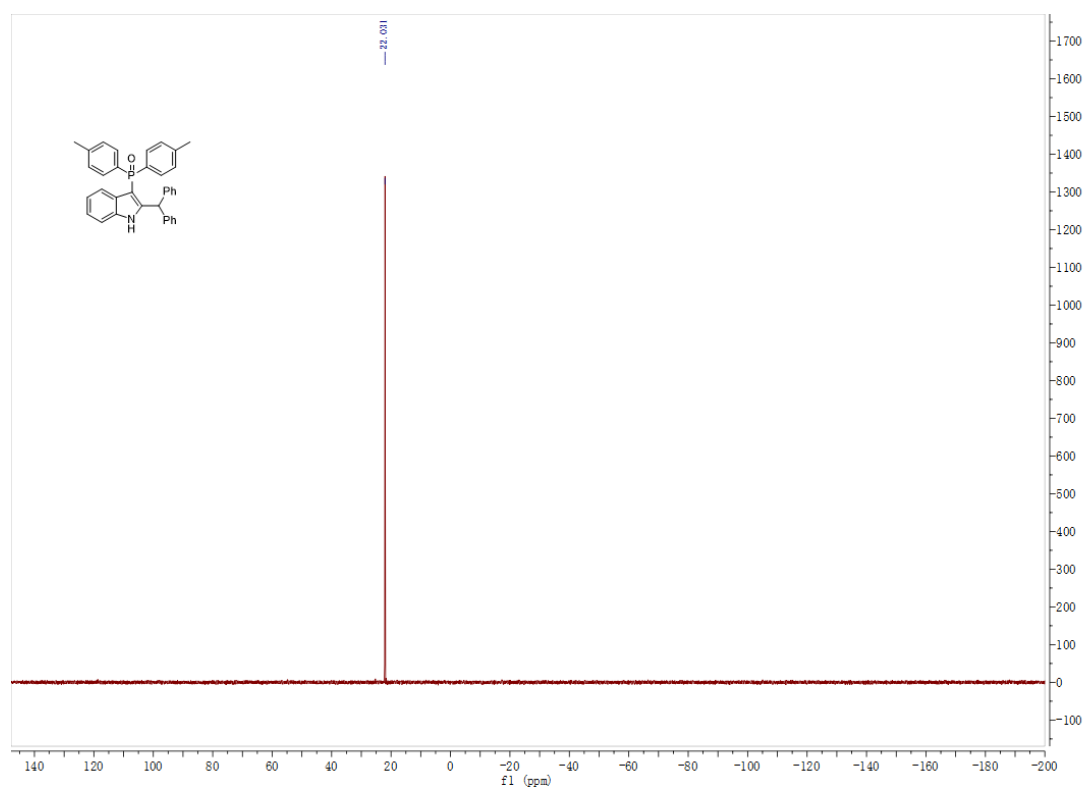

4ac

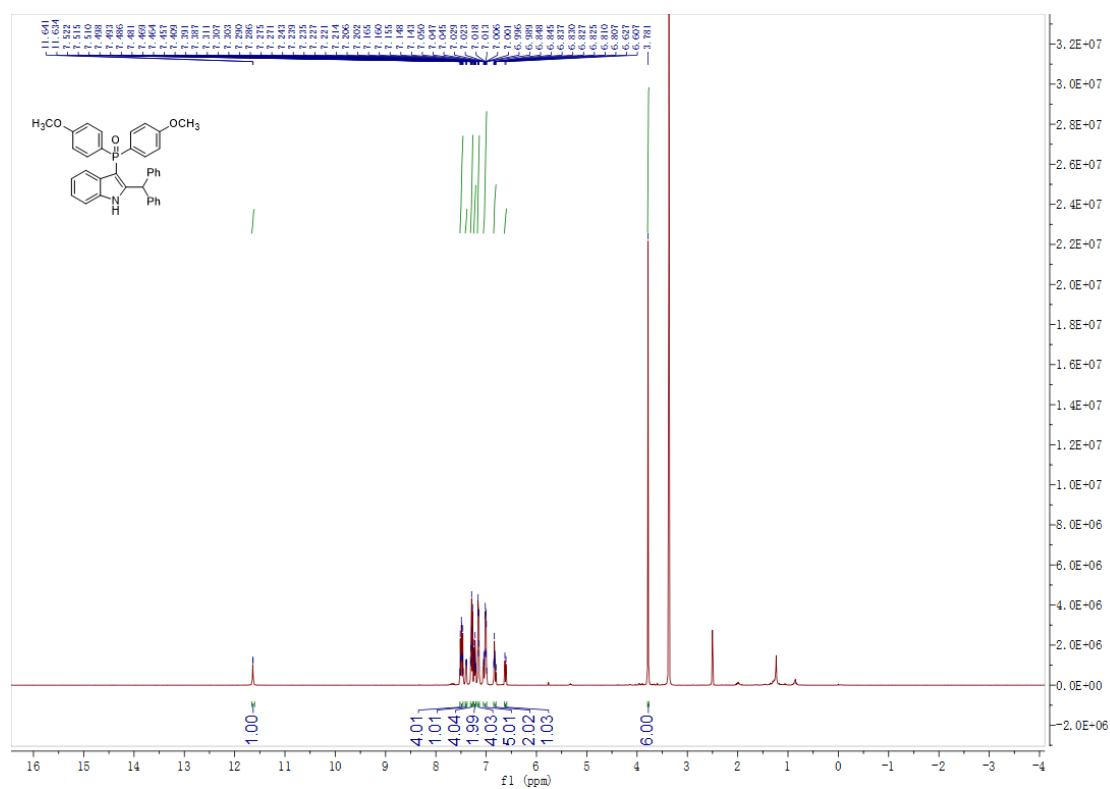

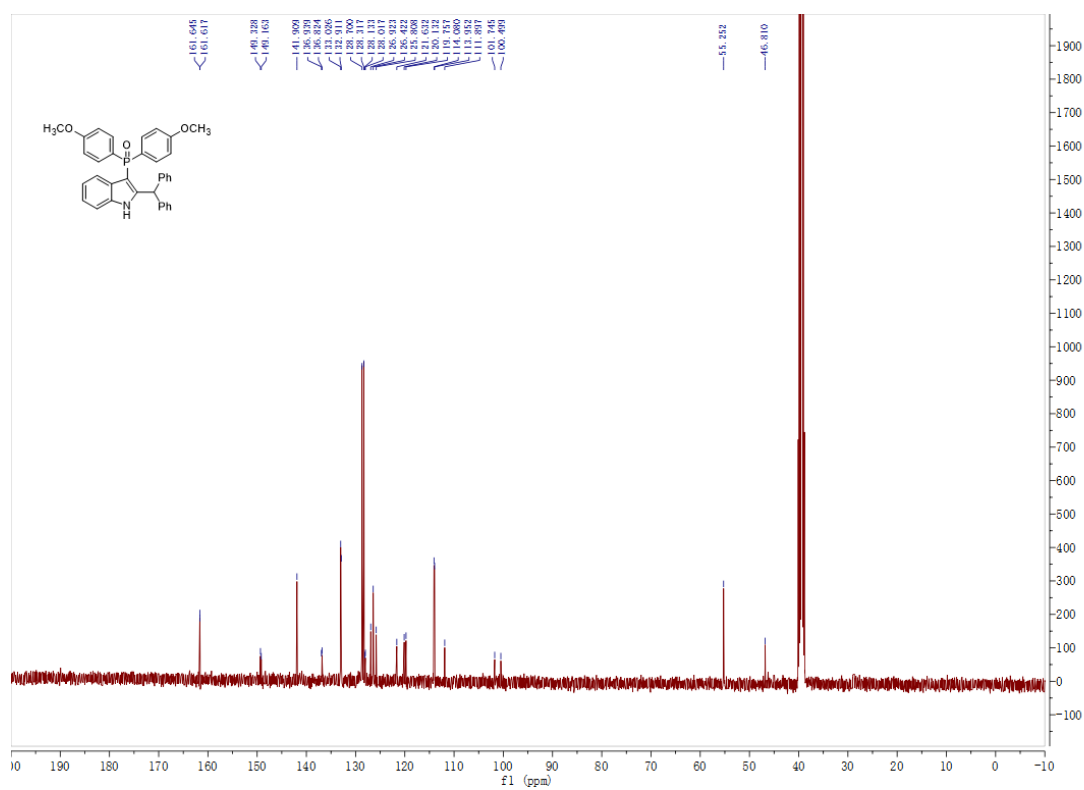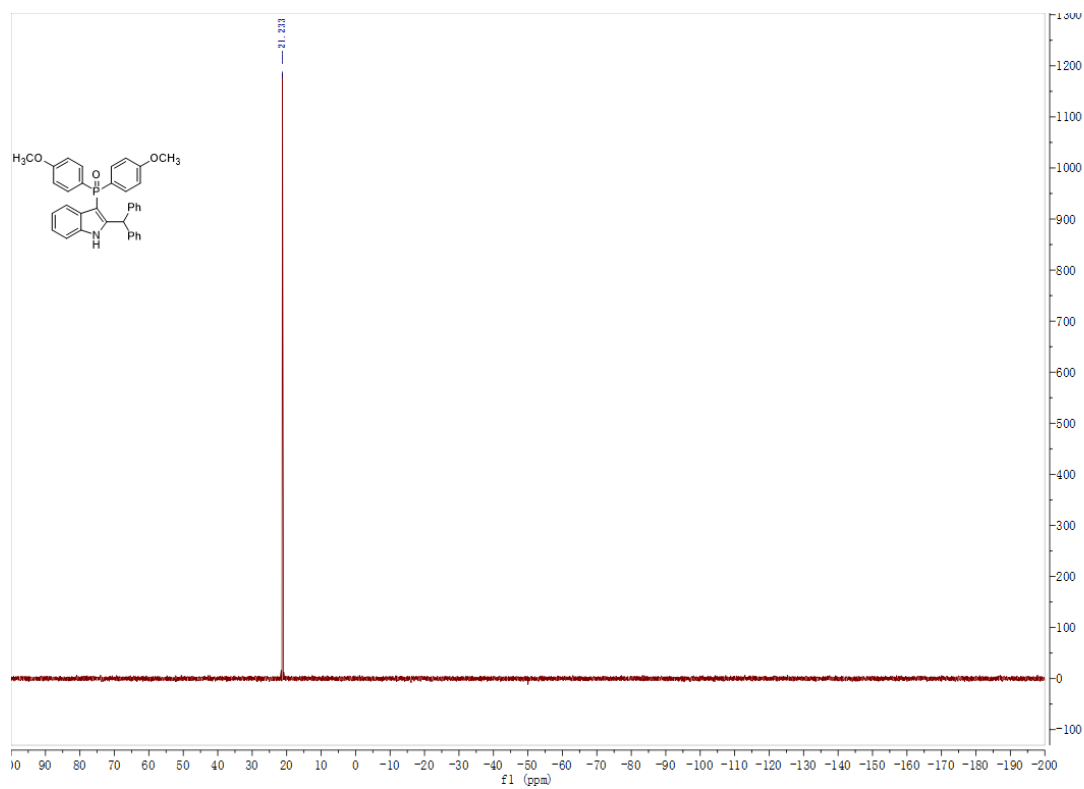

**4ad**

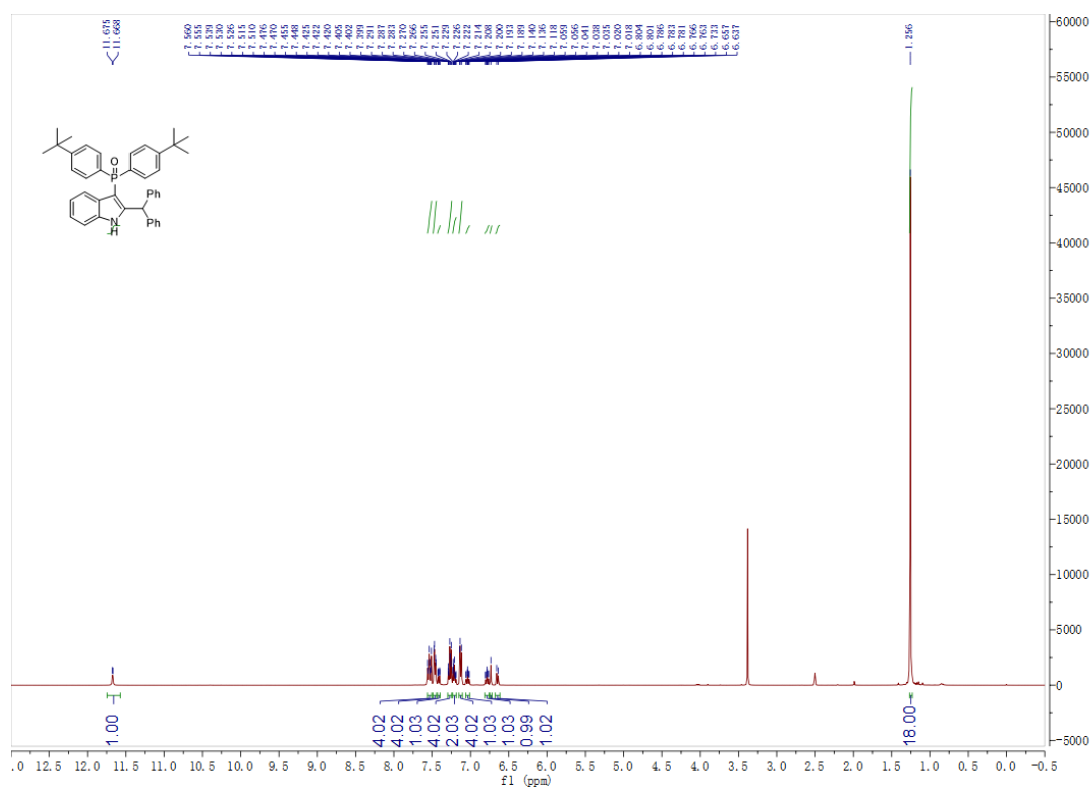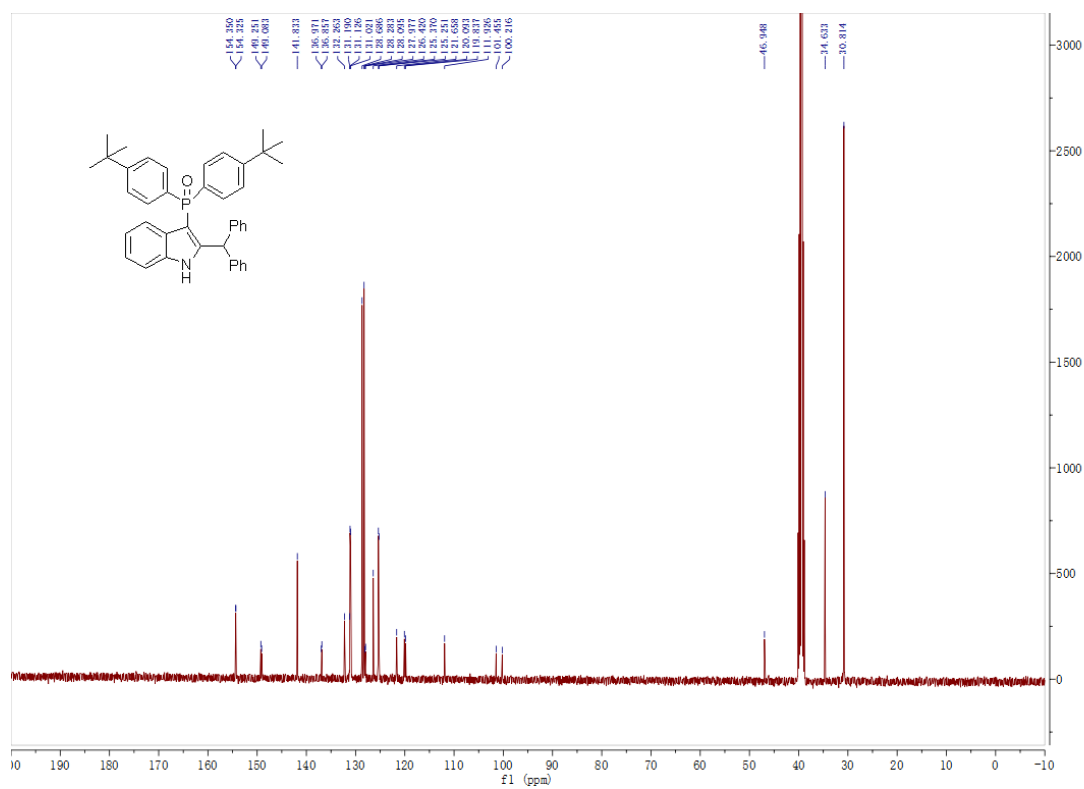



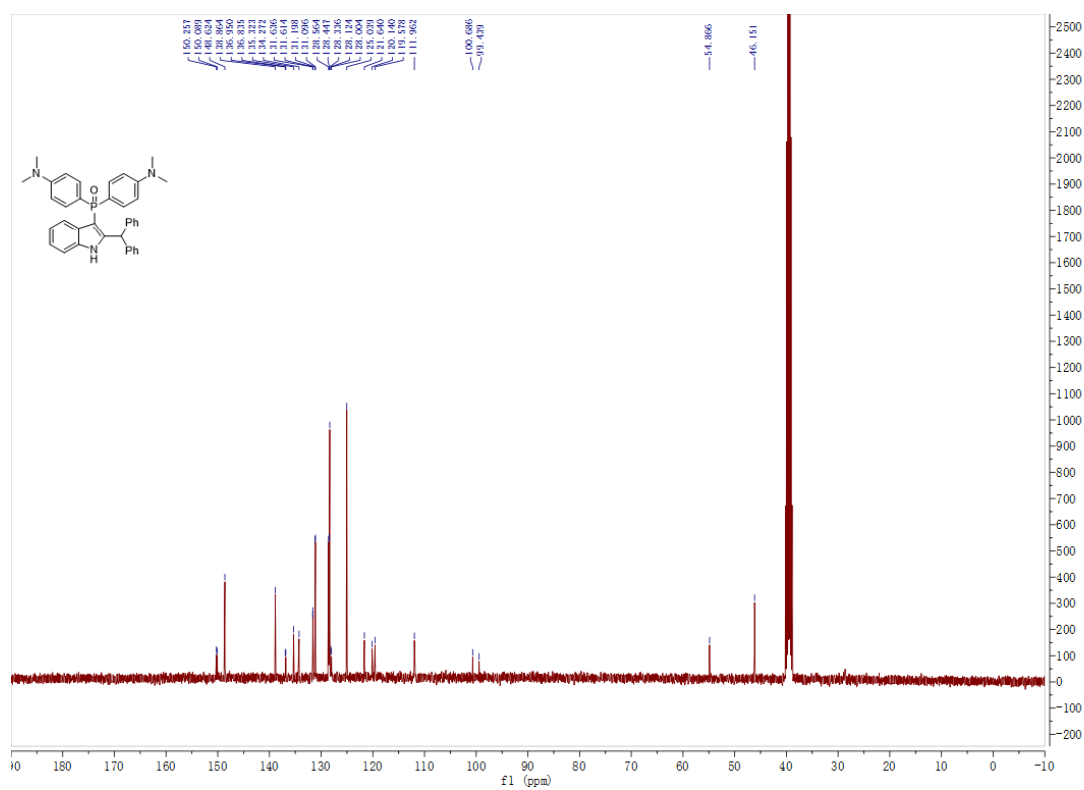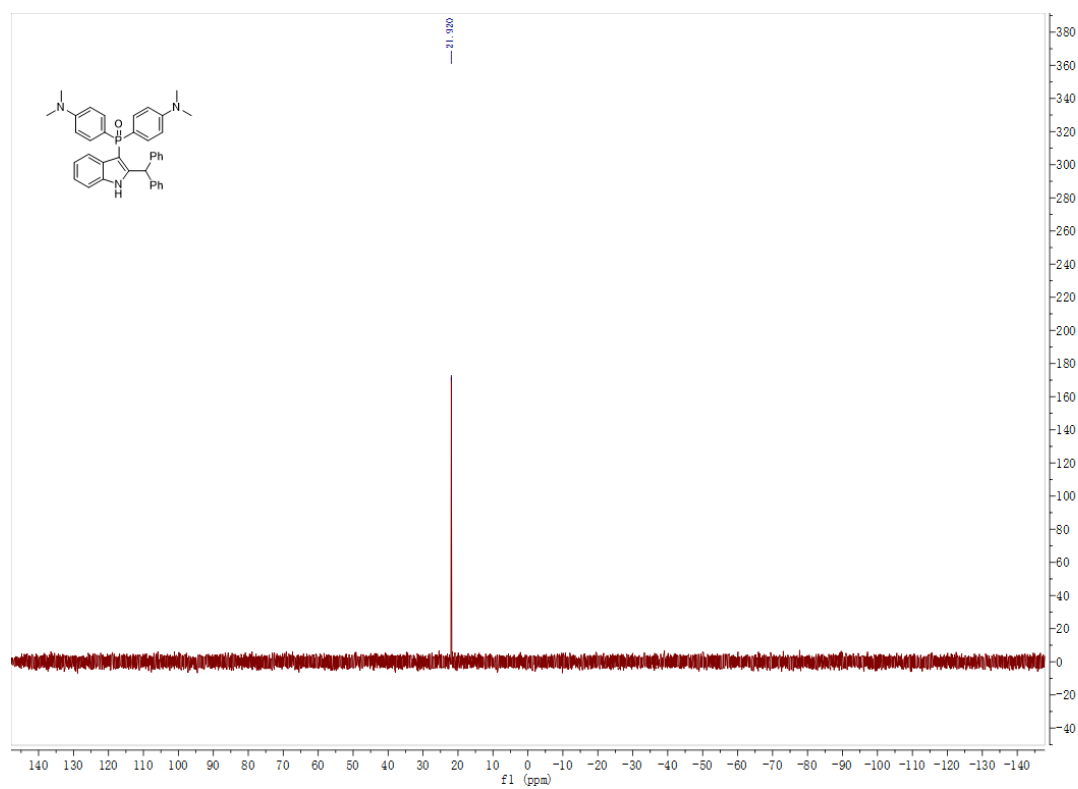

4af

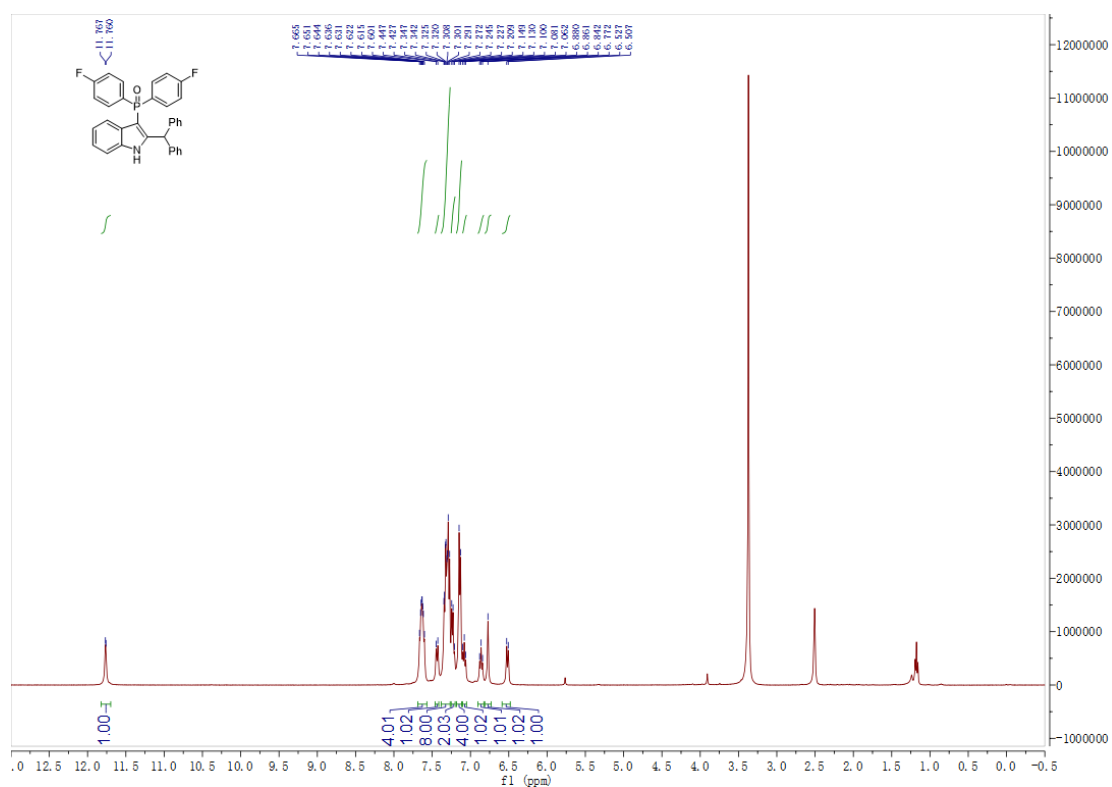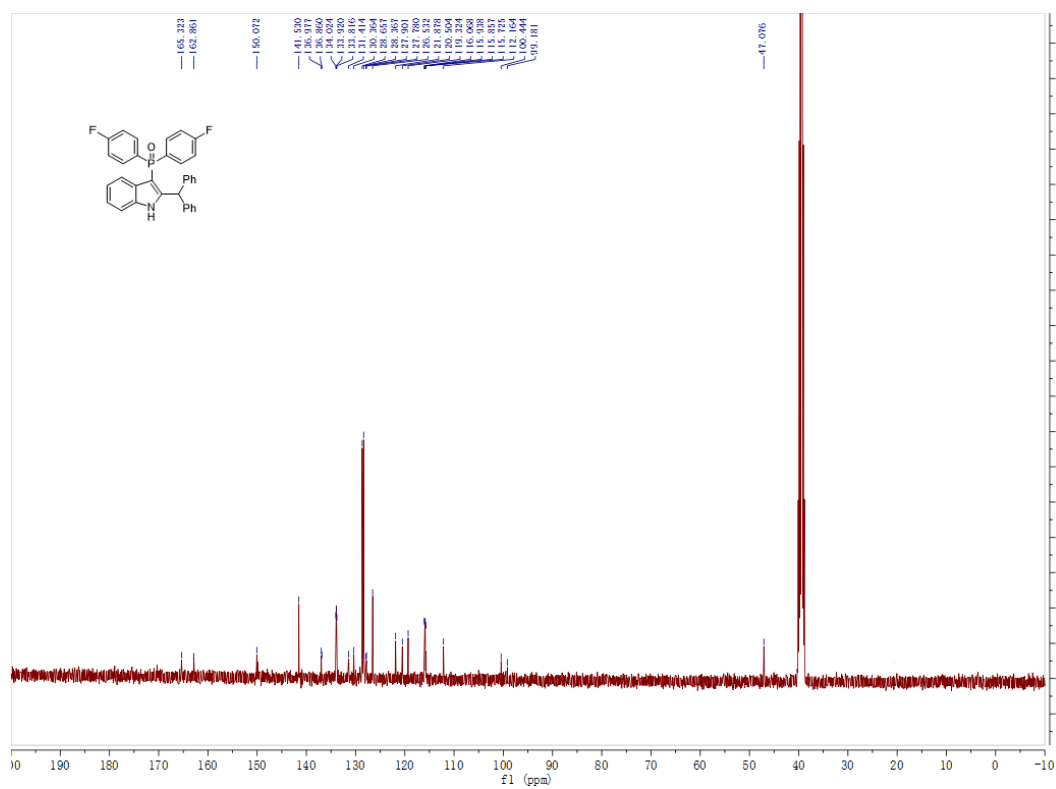



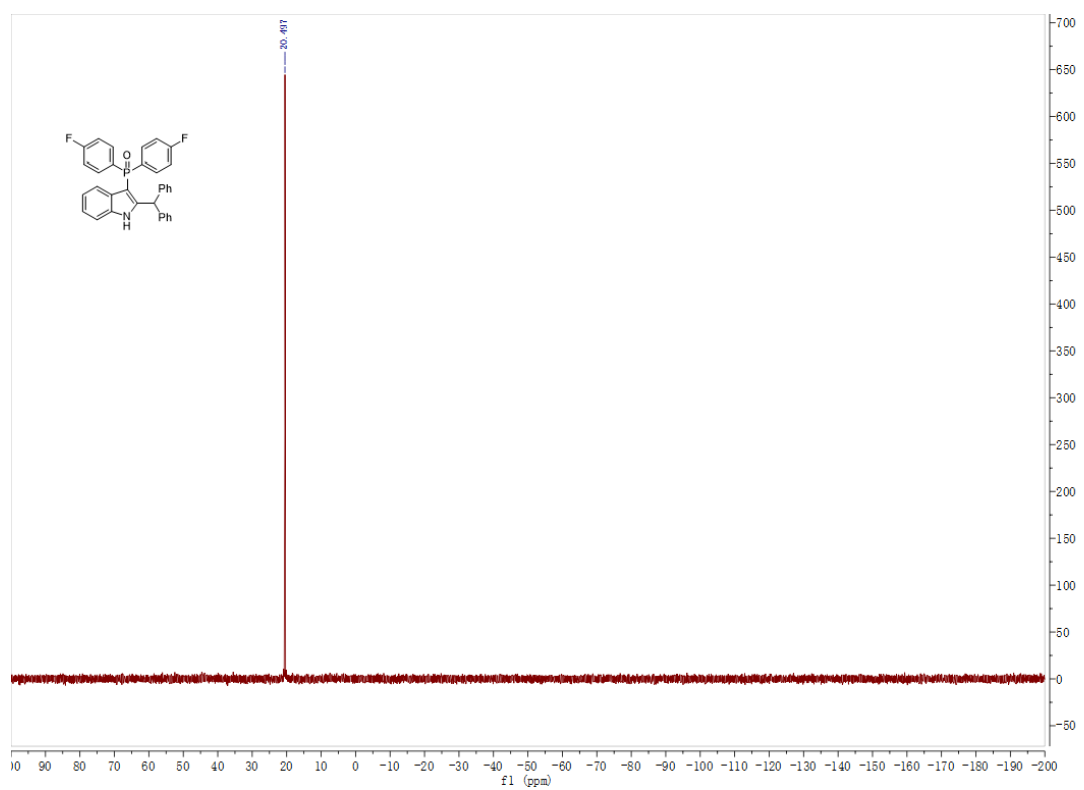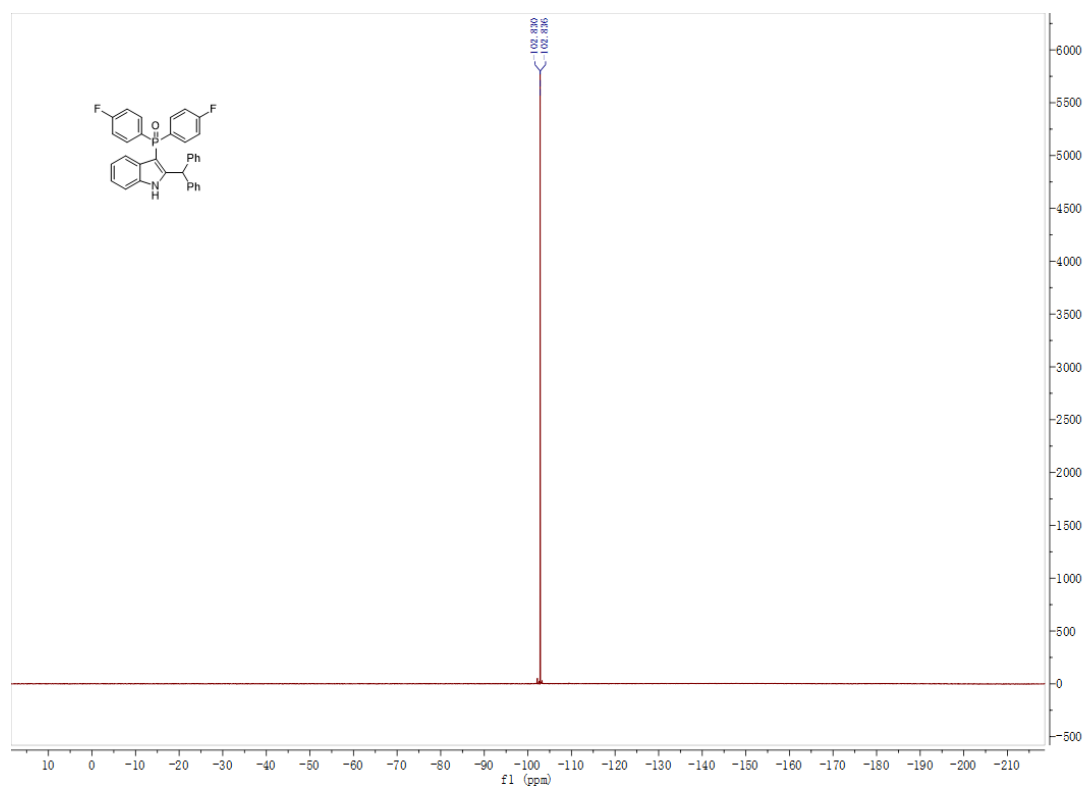

4ag

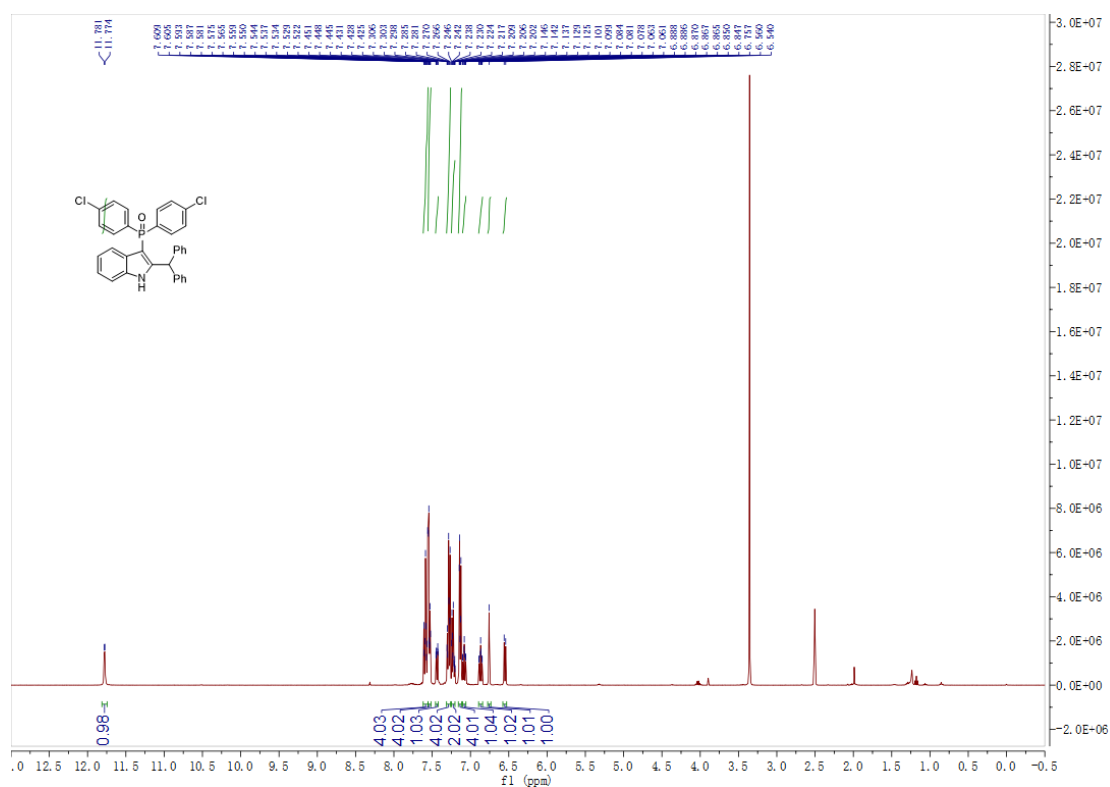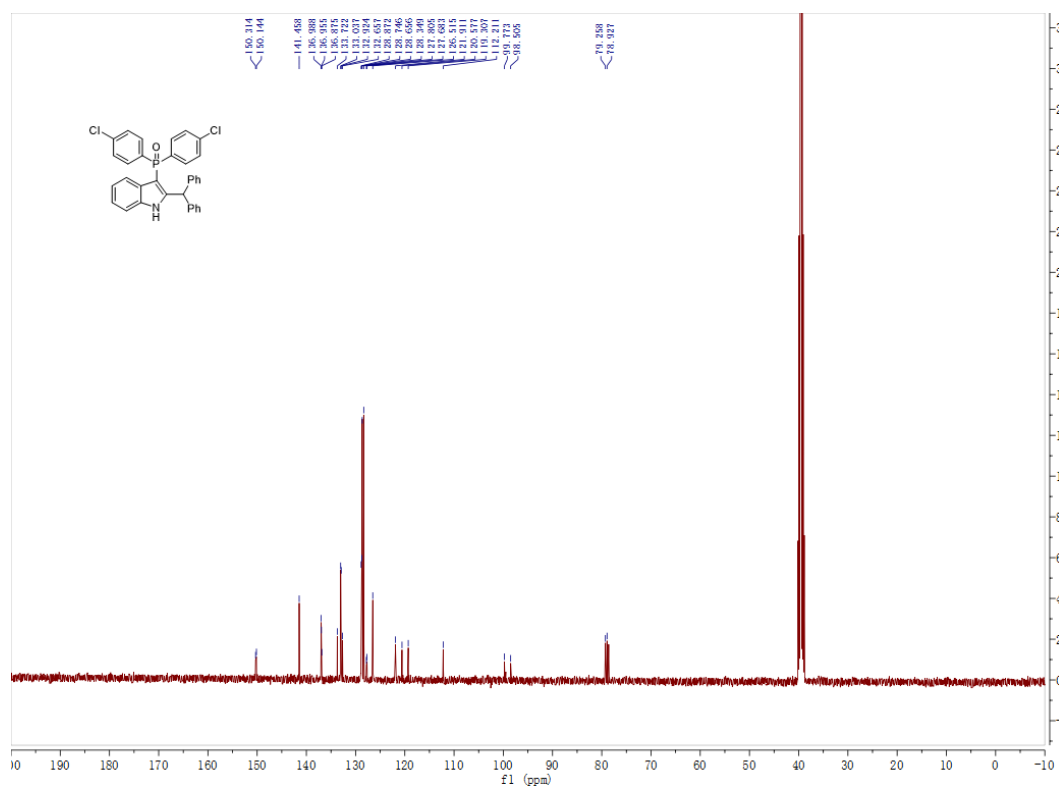

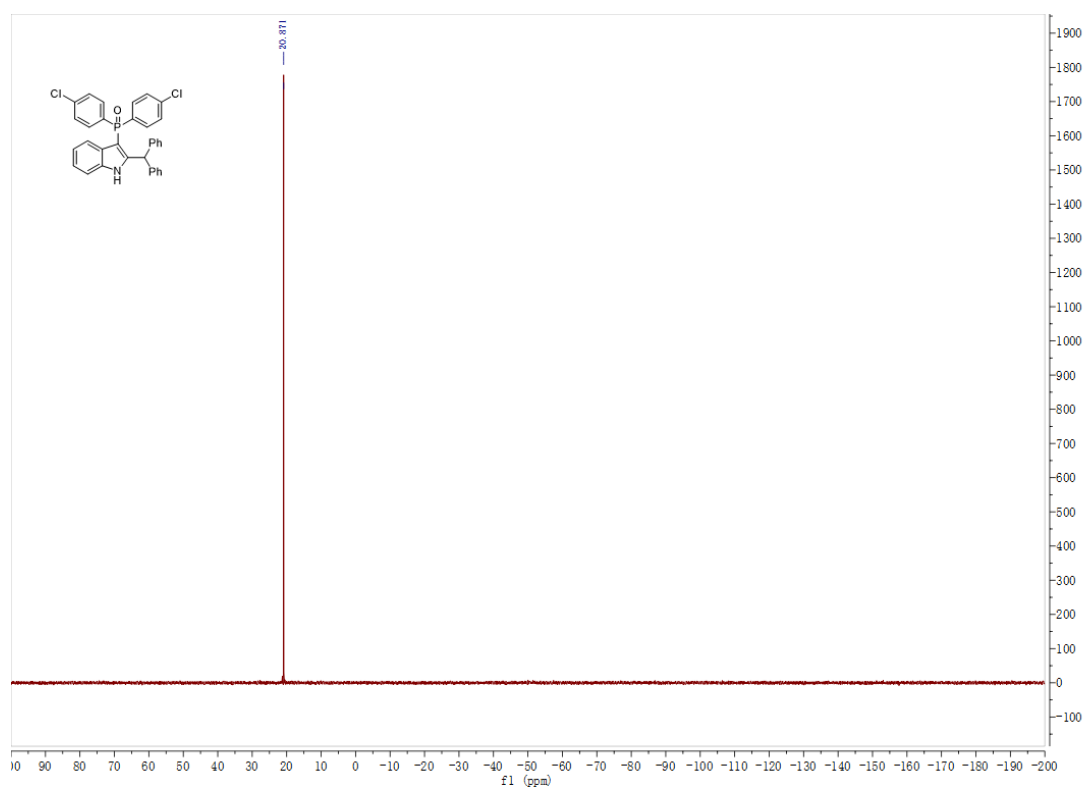

**4ah**

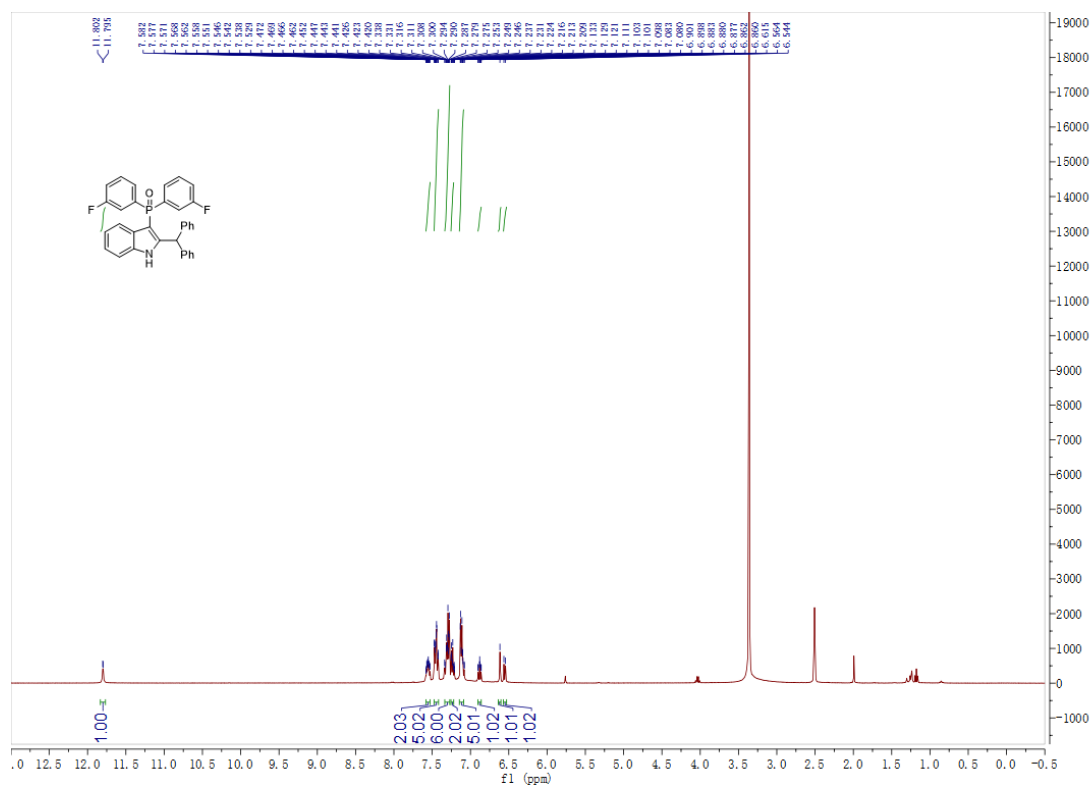

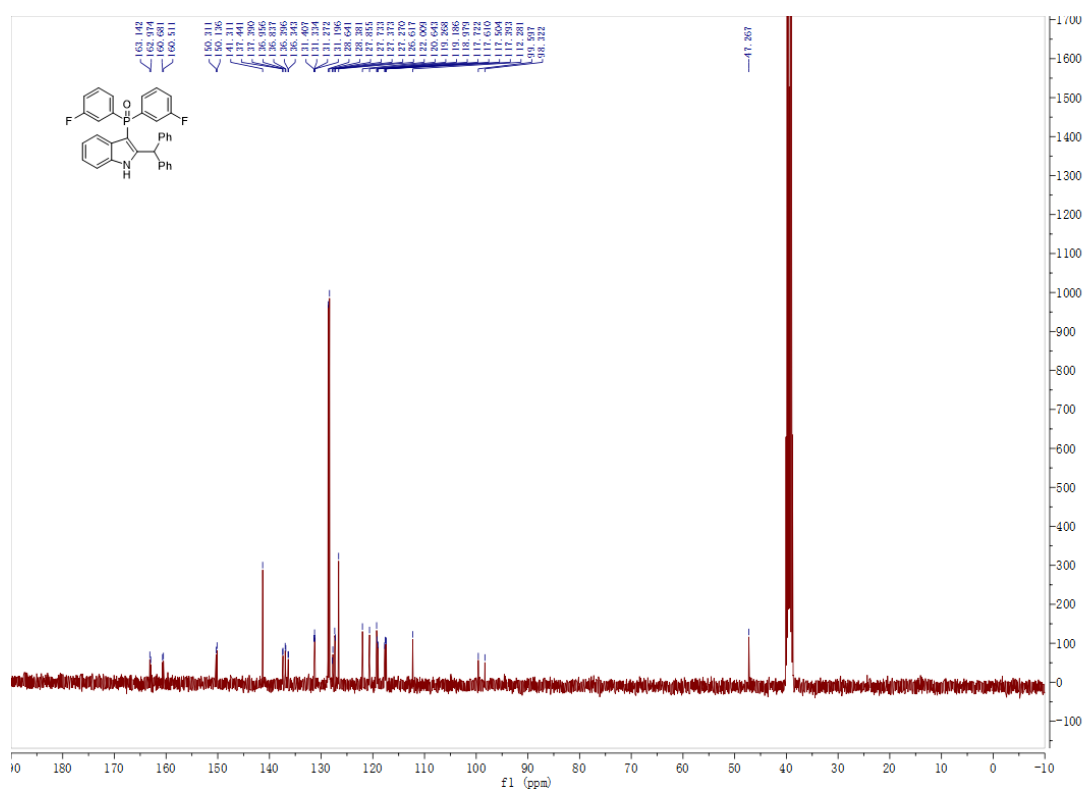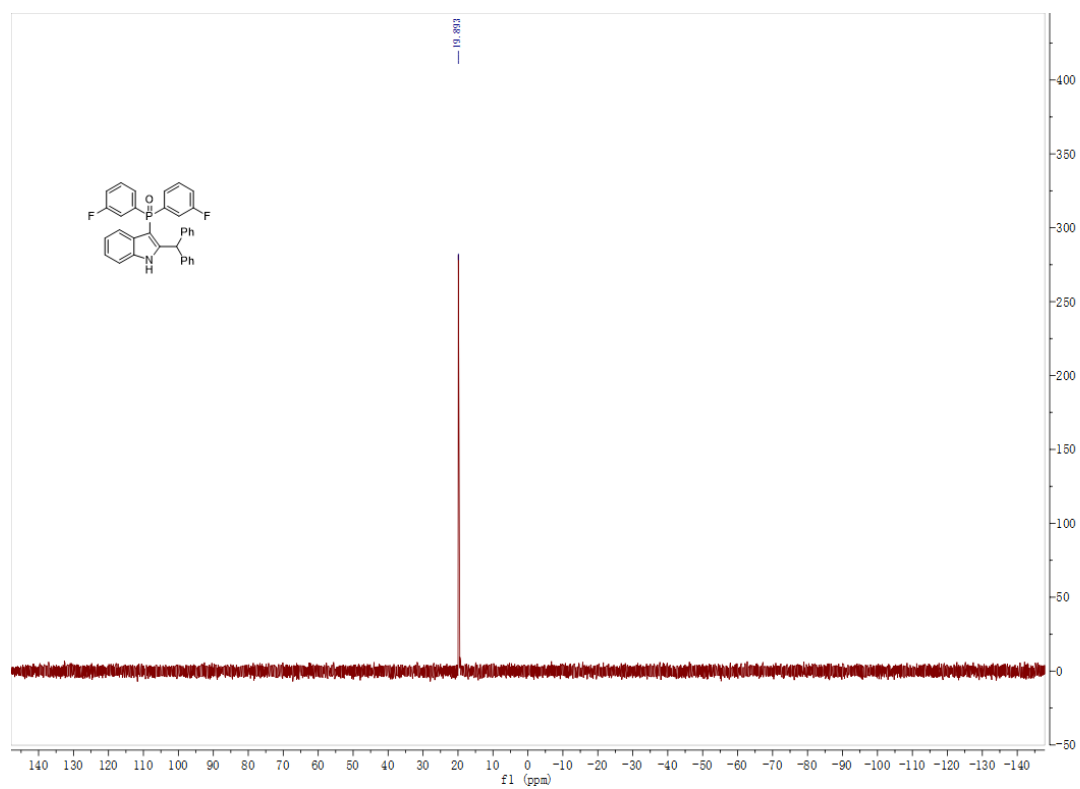

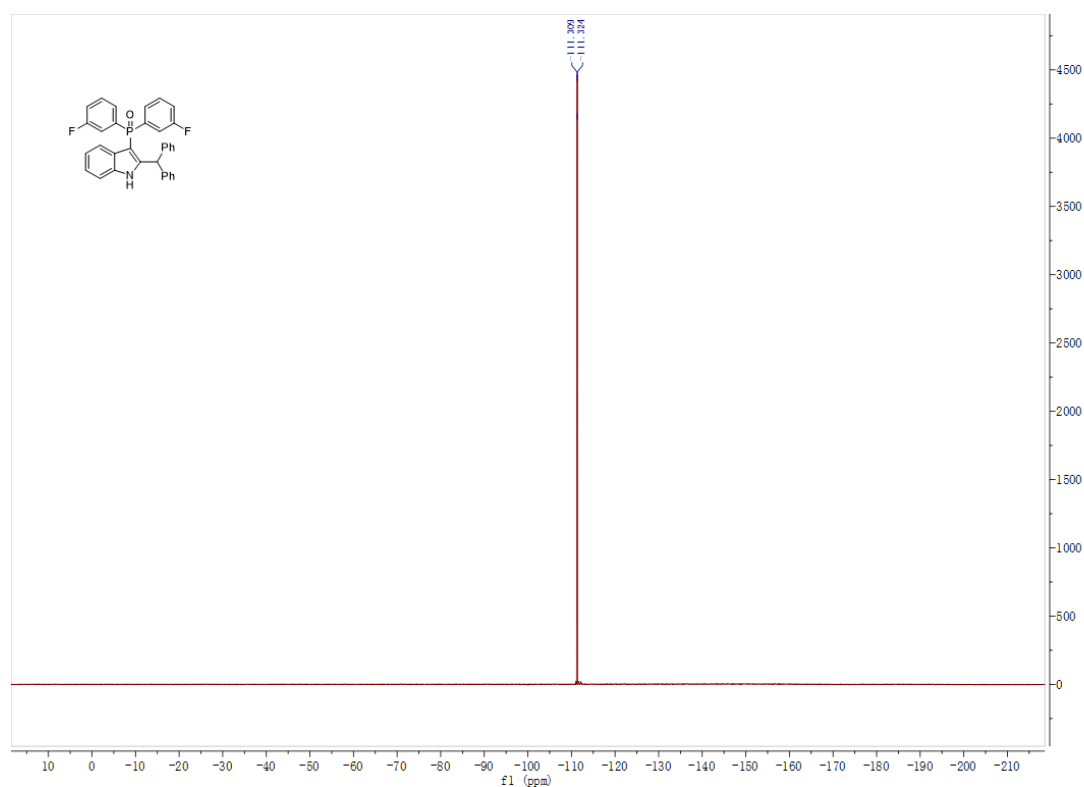

4ai

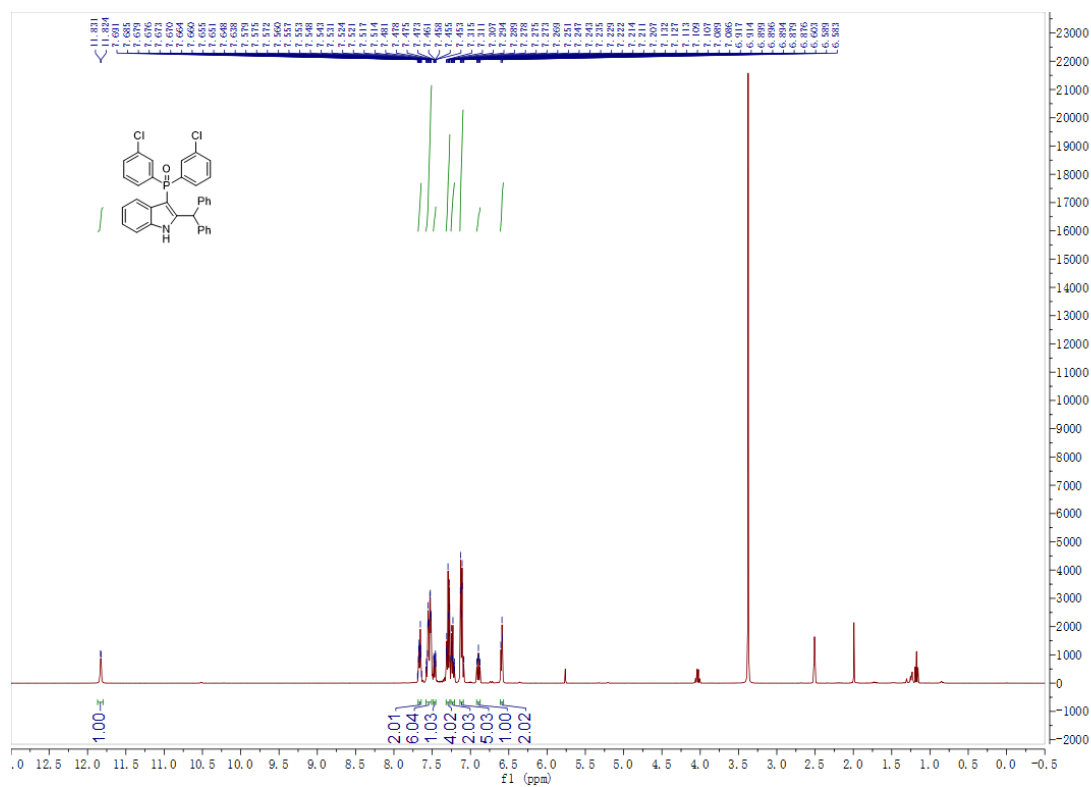

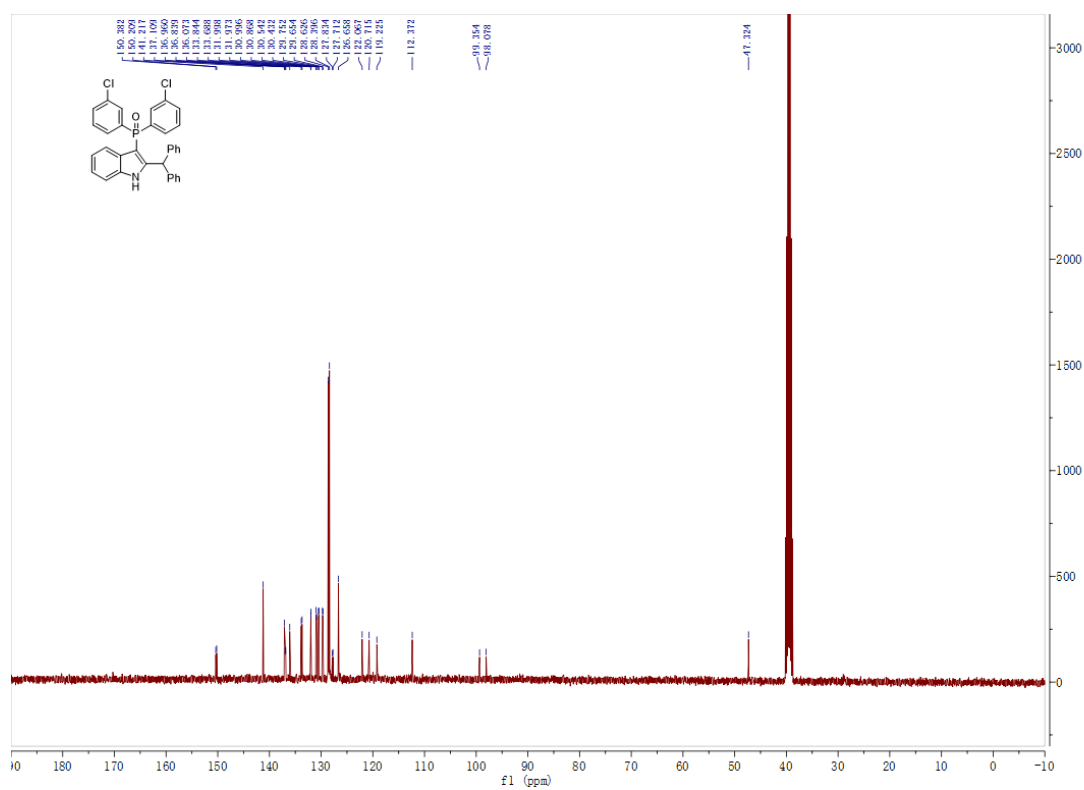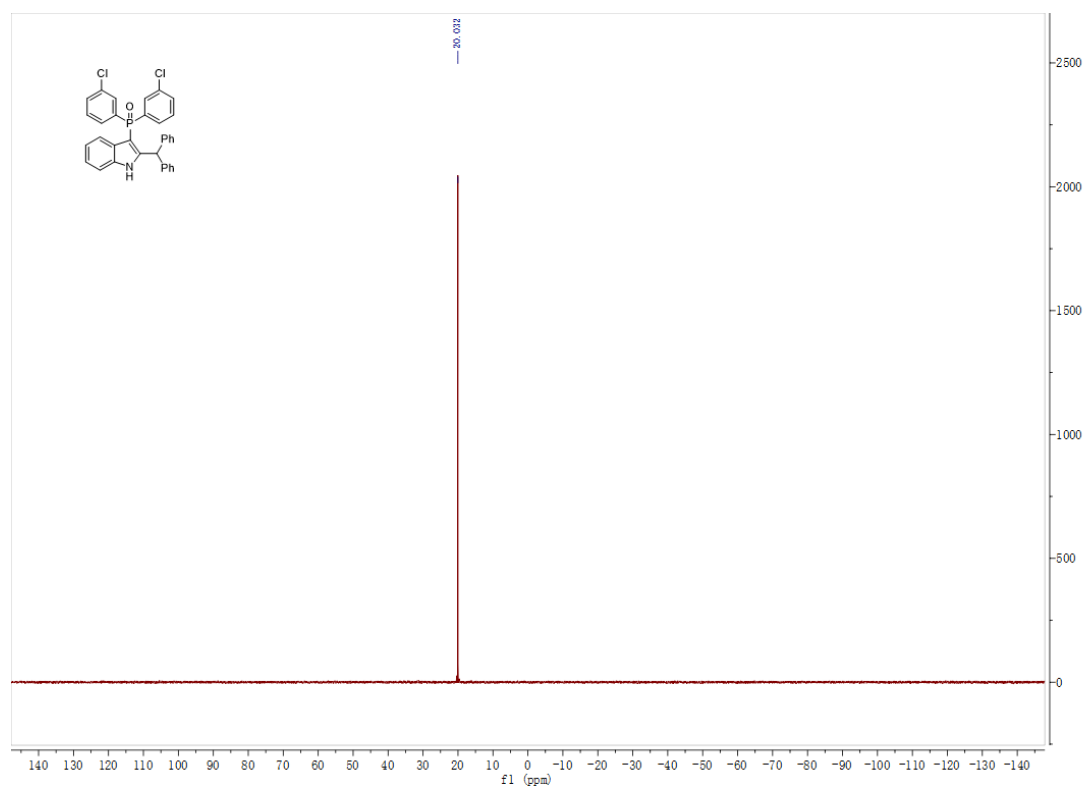

4aj

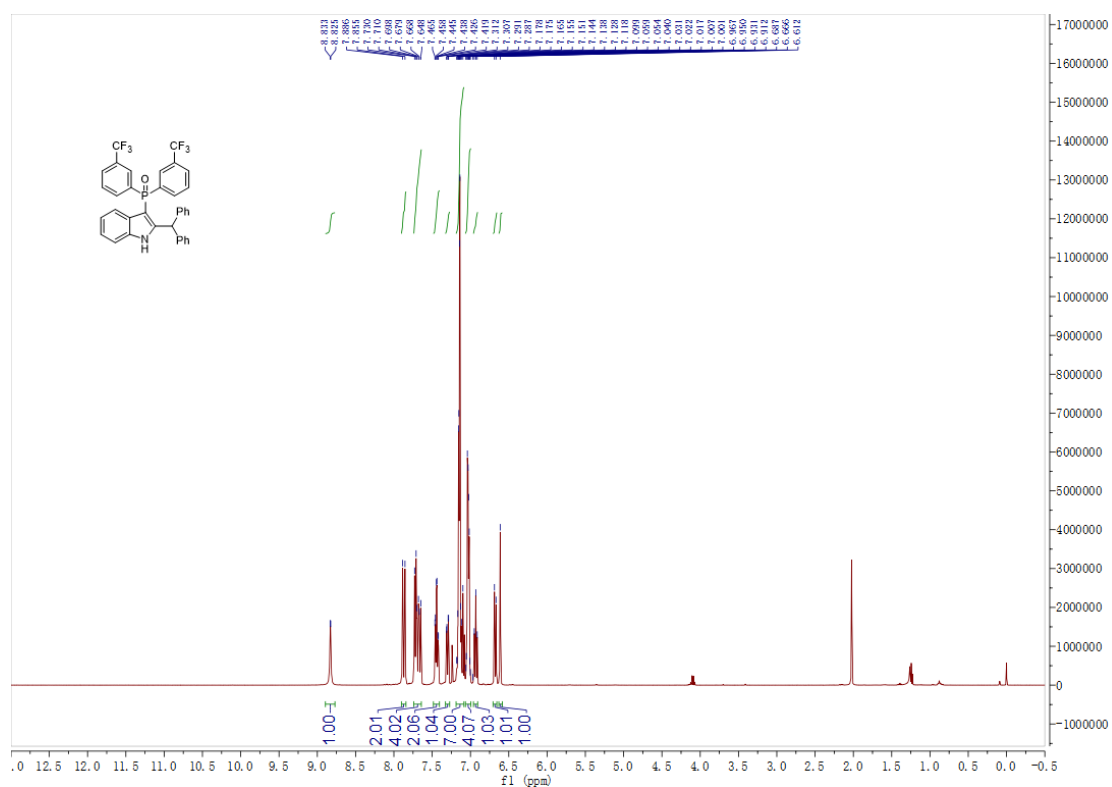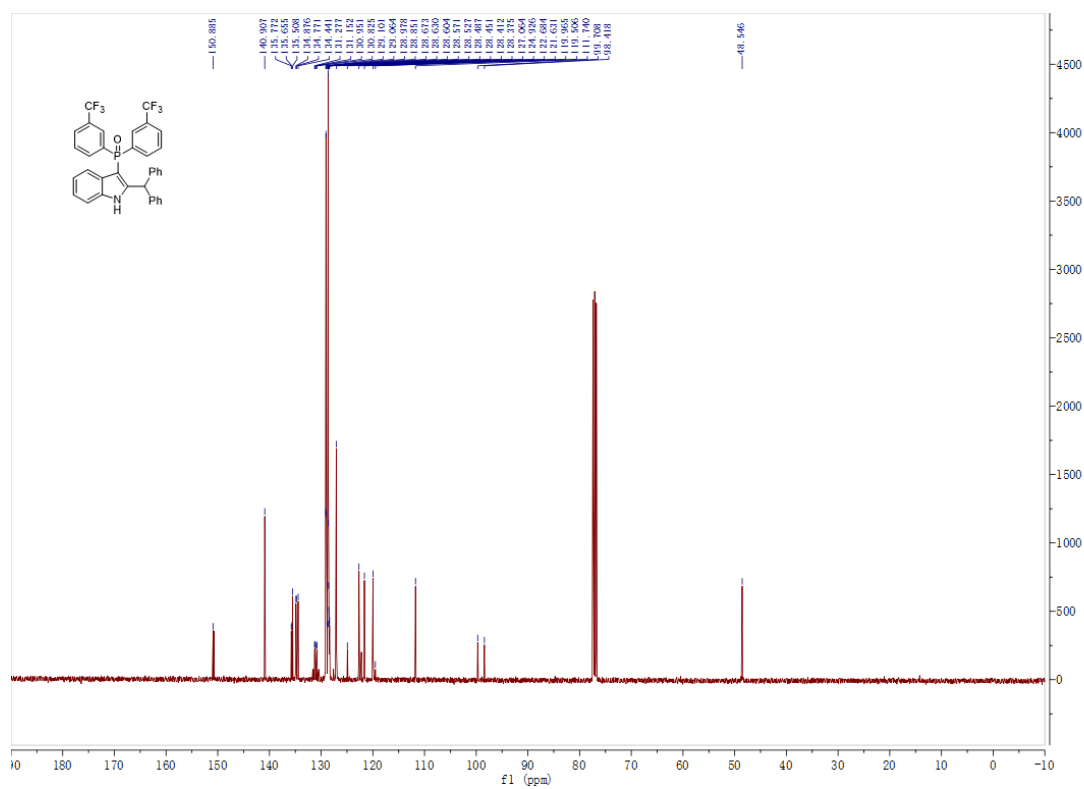

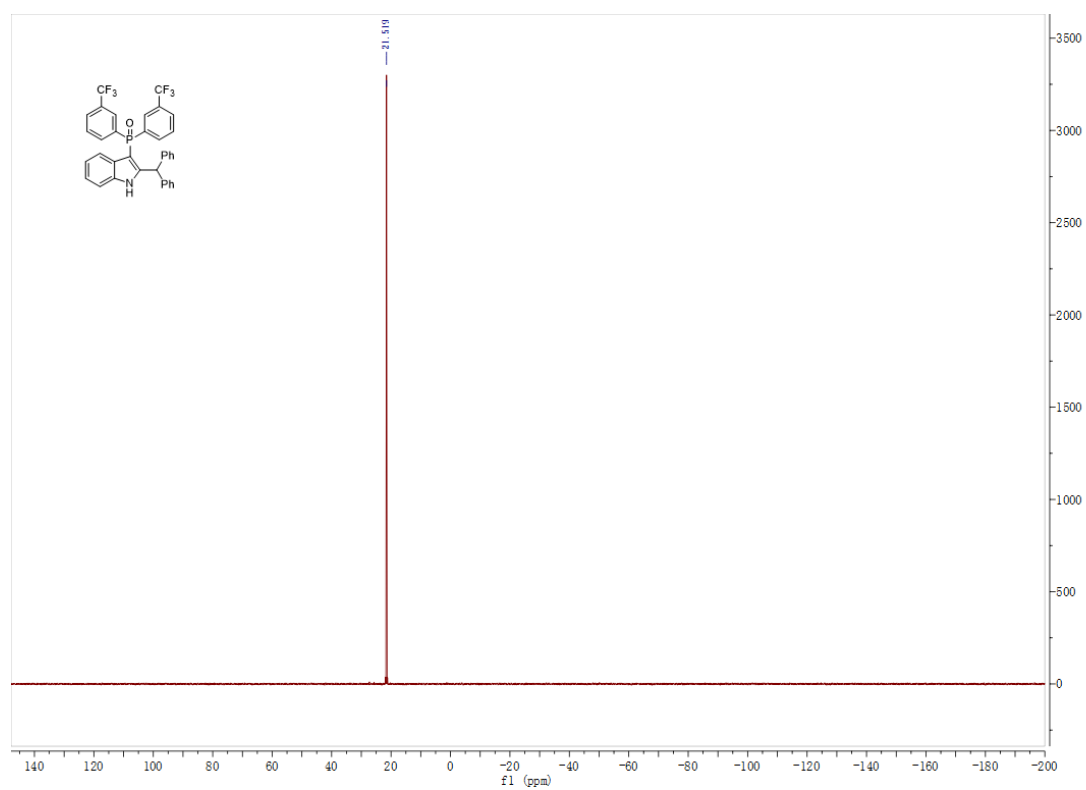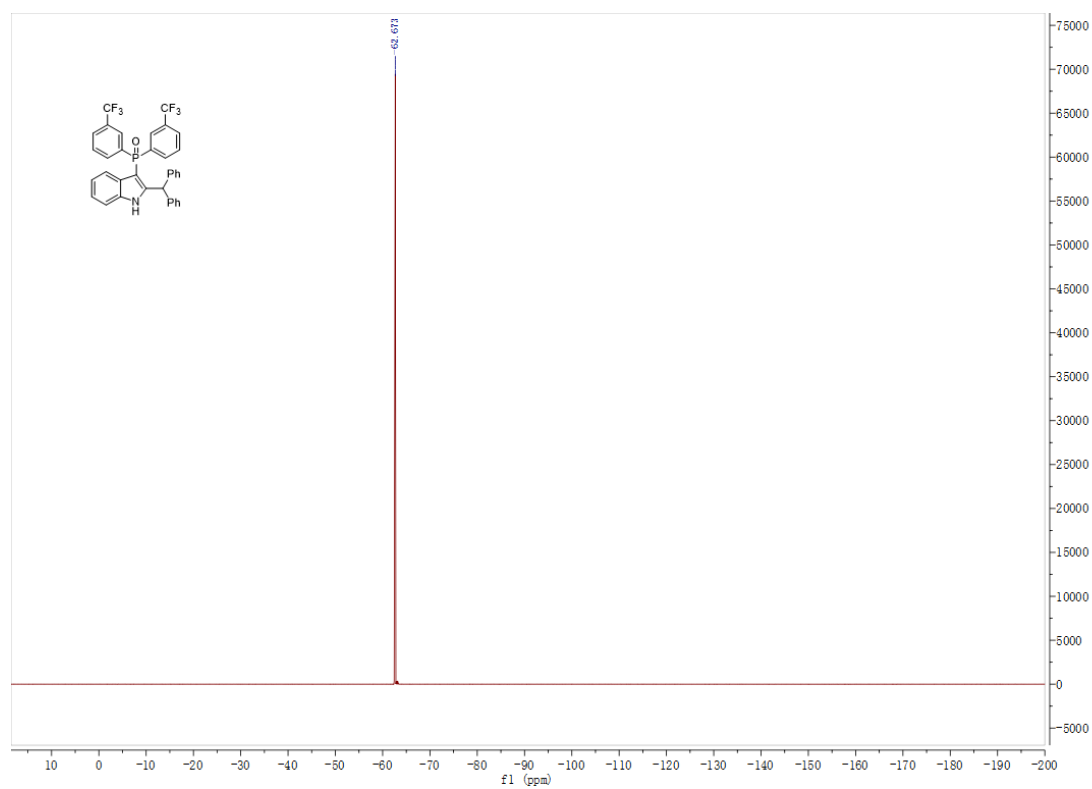

**4ak**



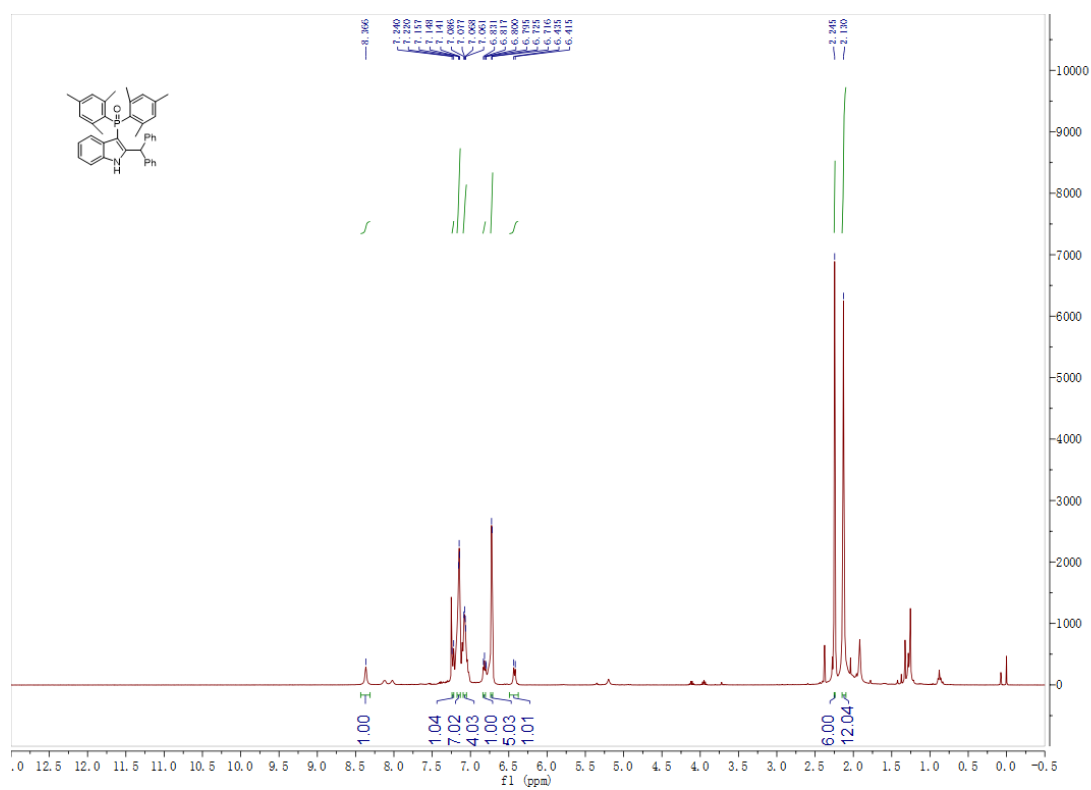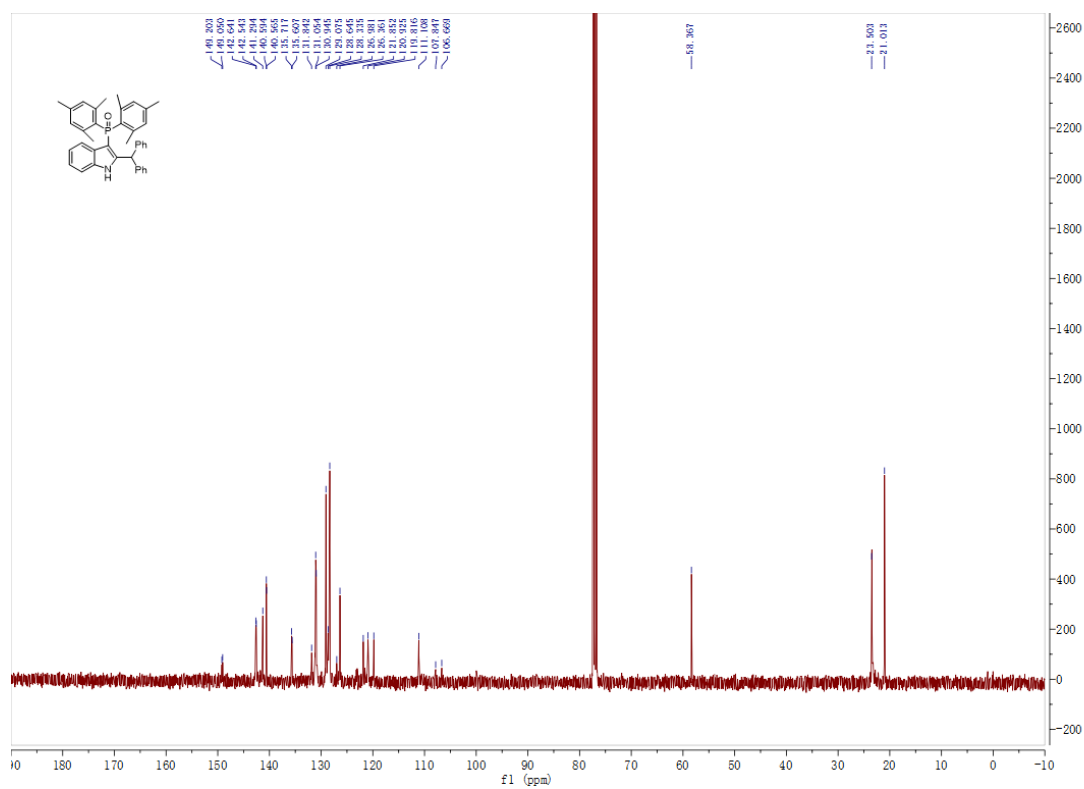

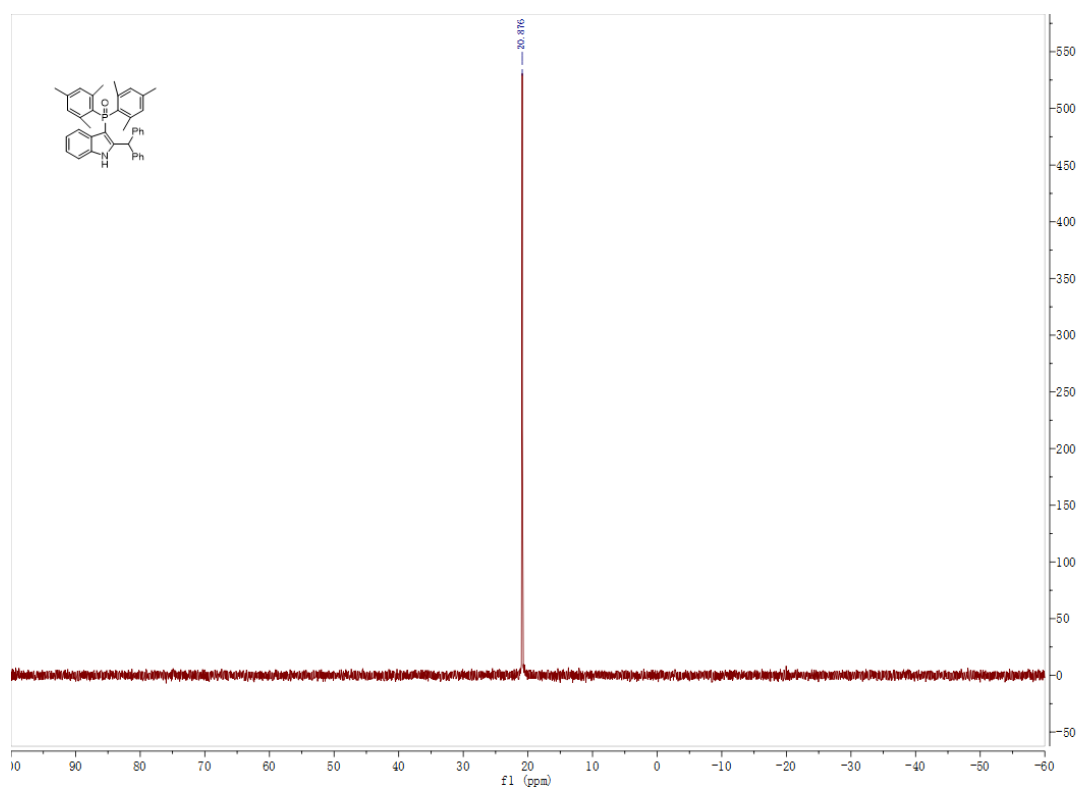

**4aI**

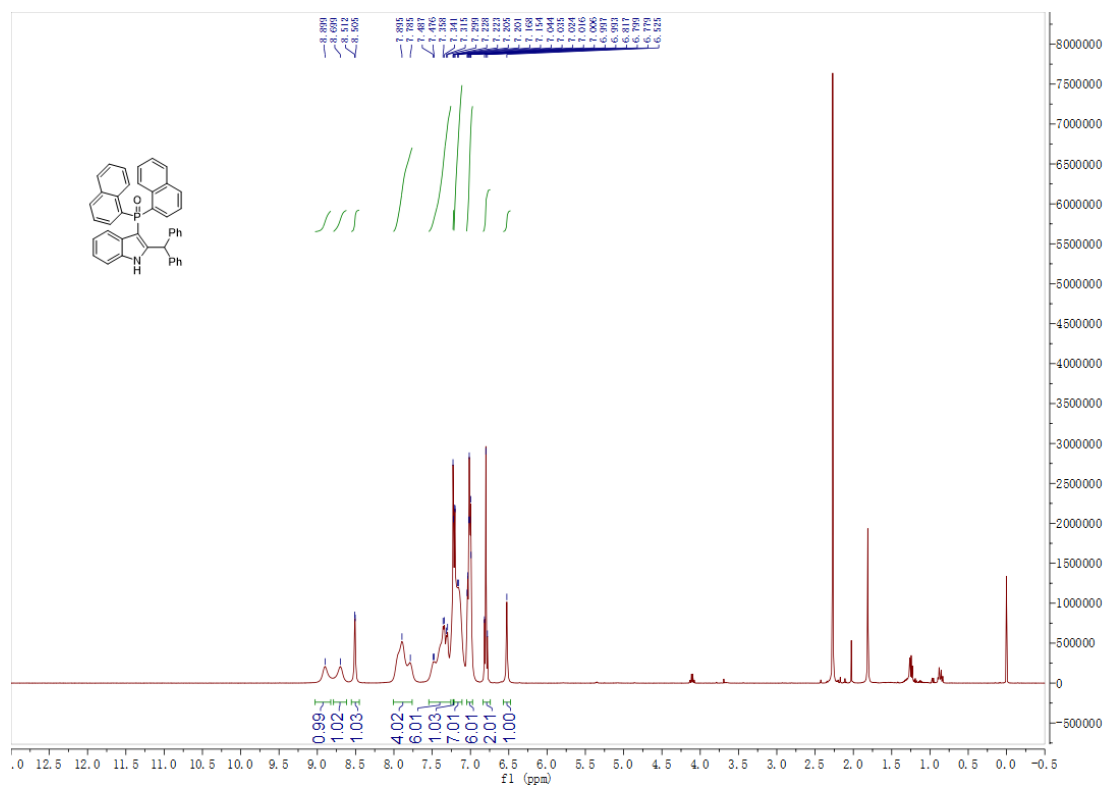

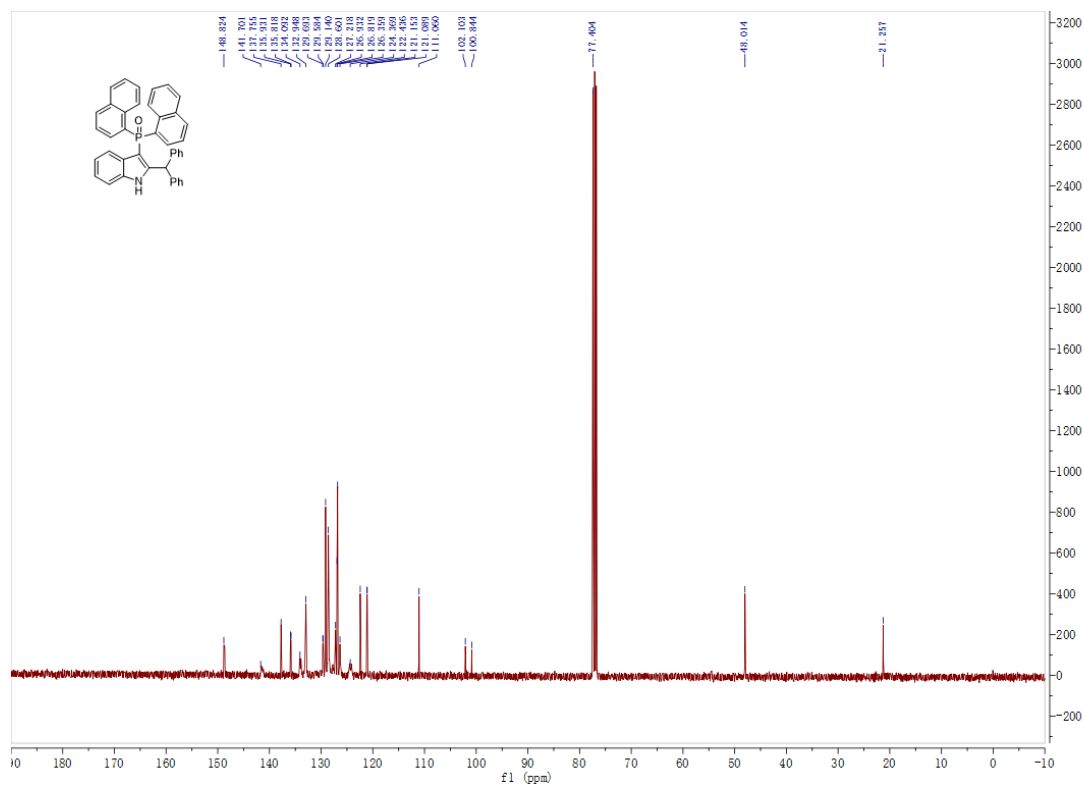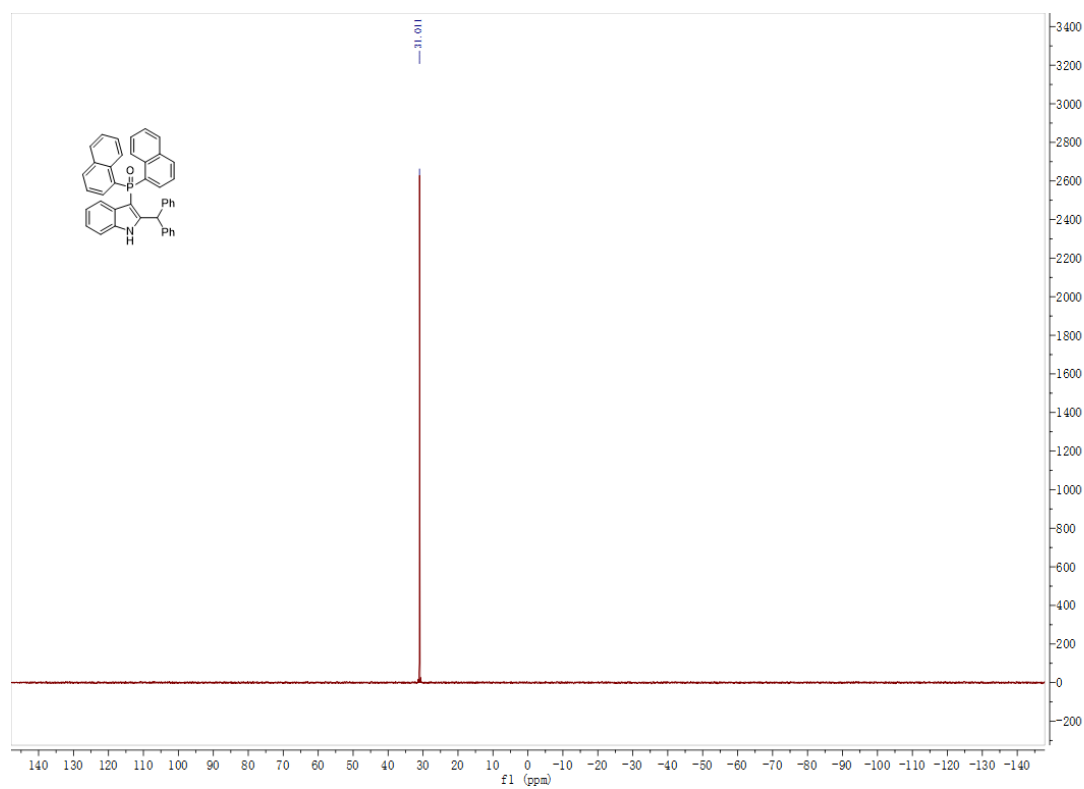

**4am**

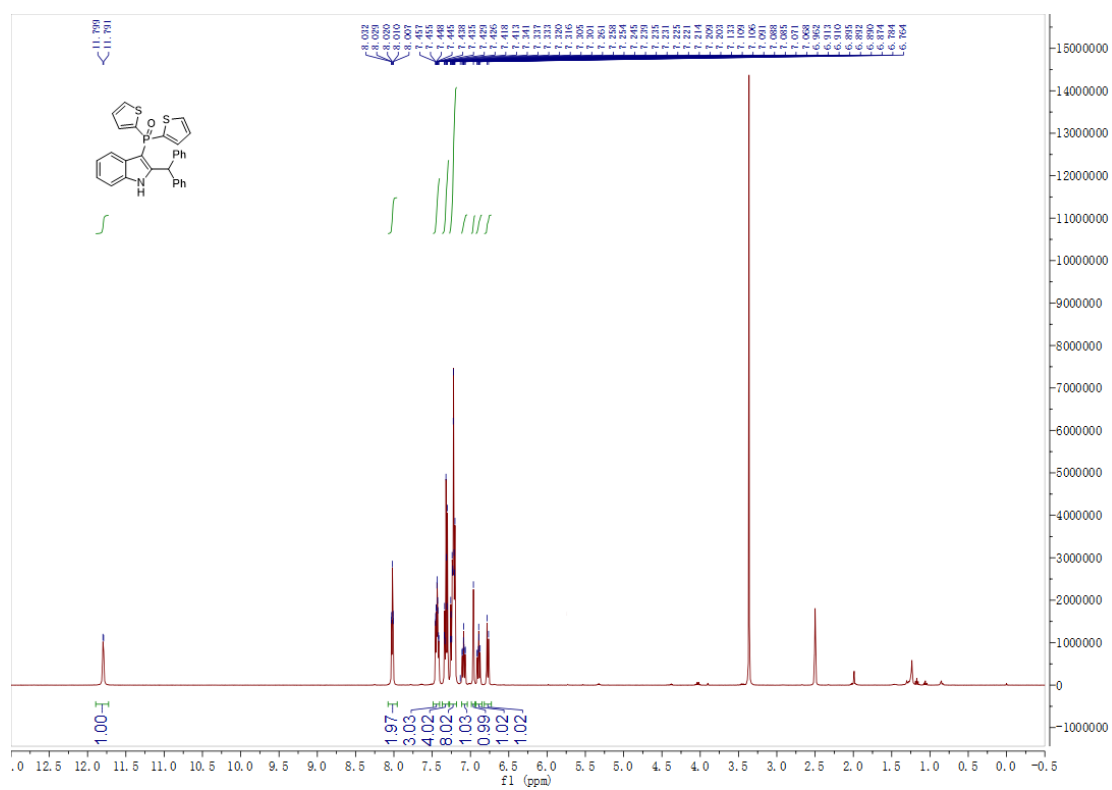

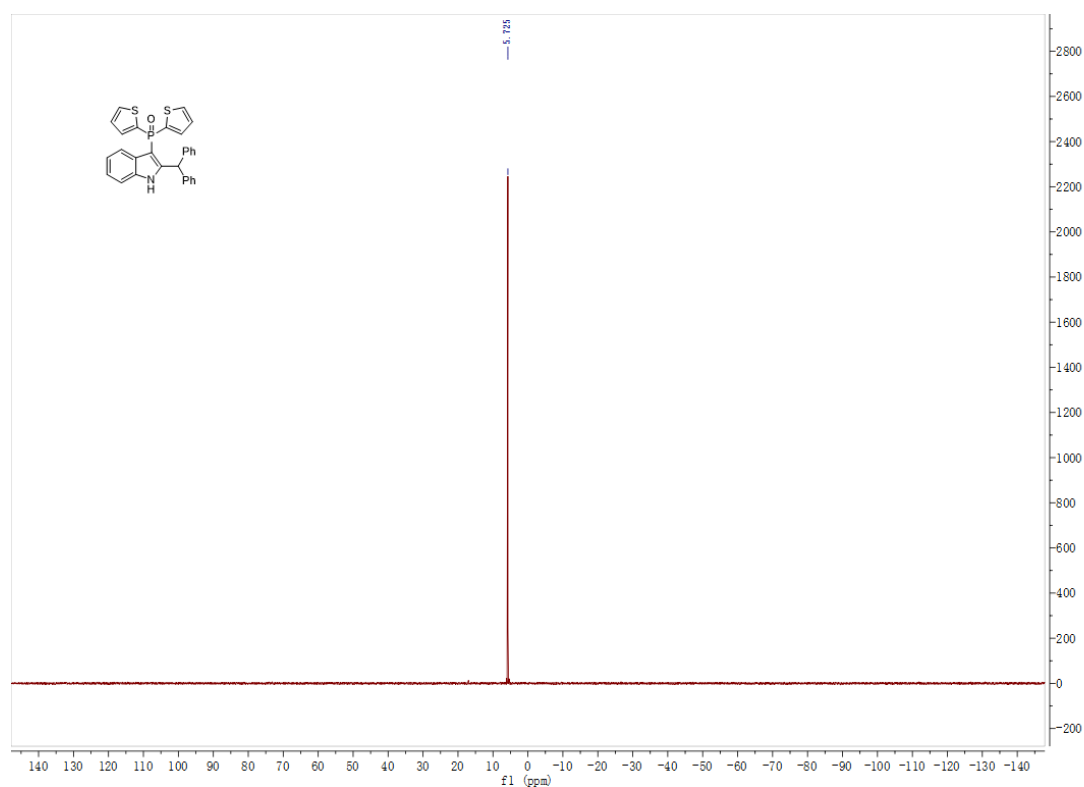

4an

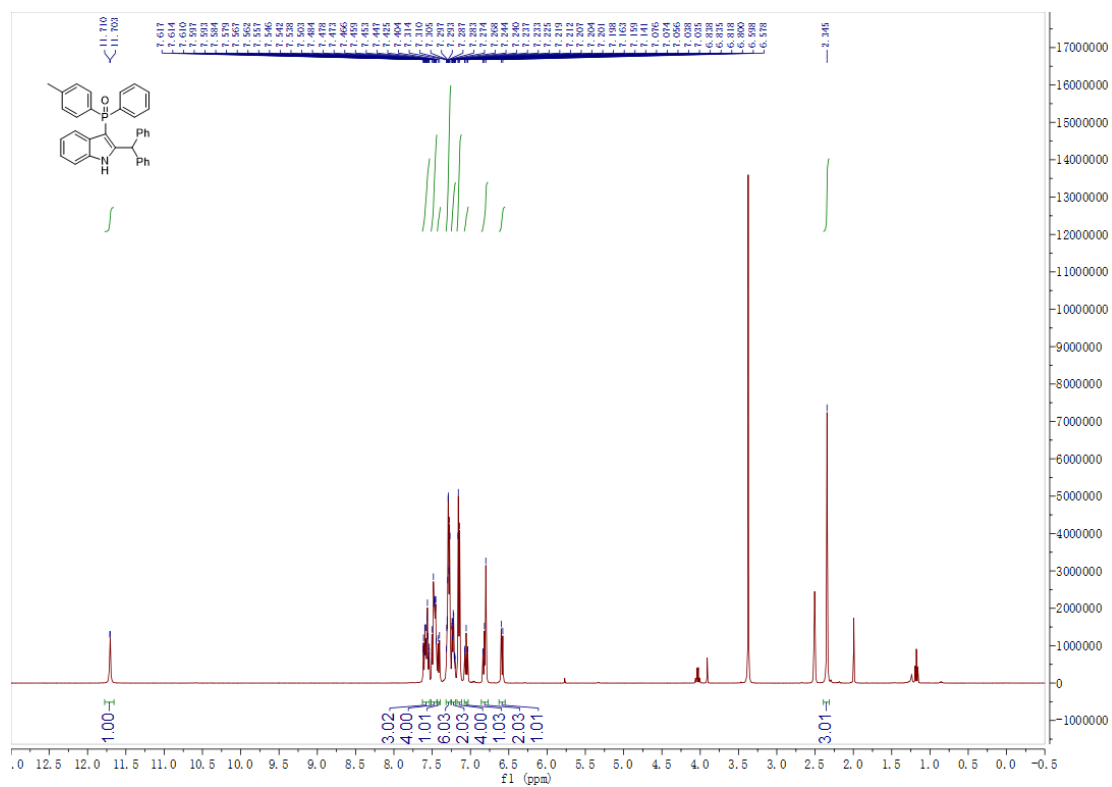

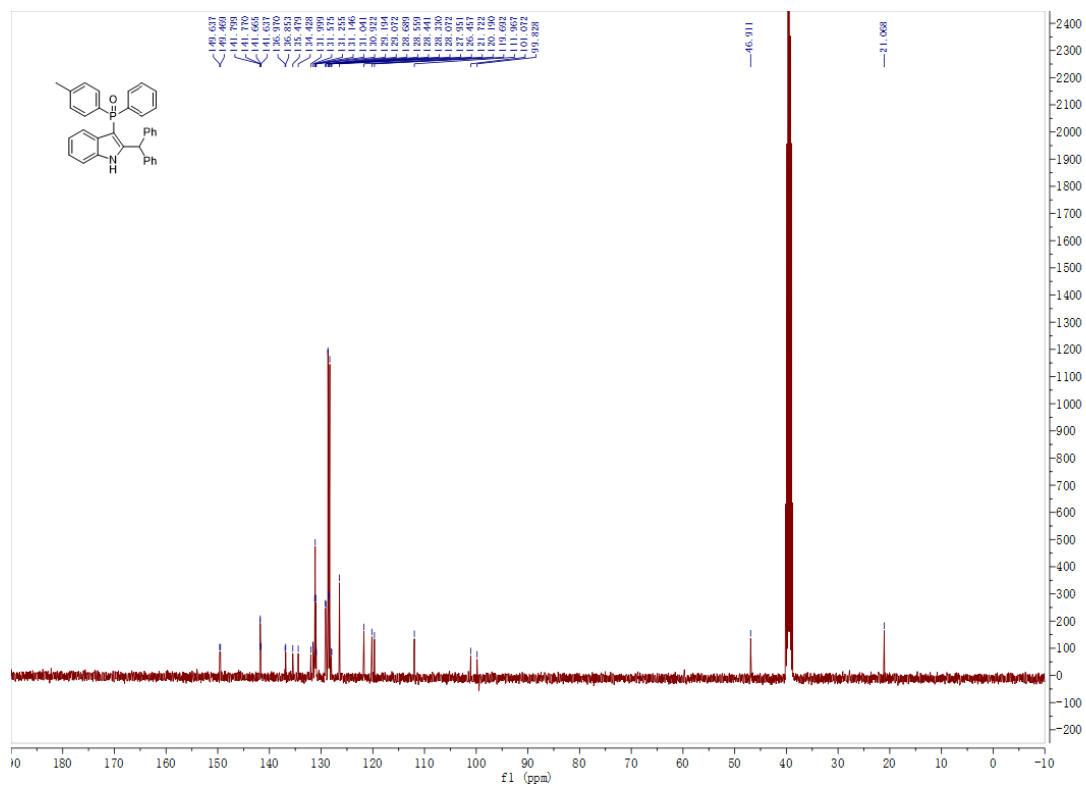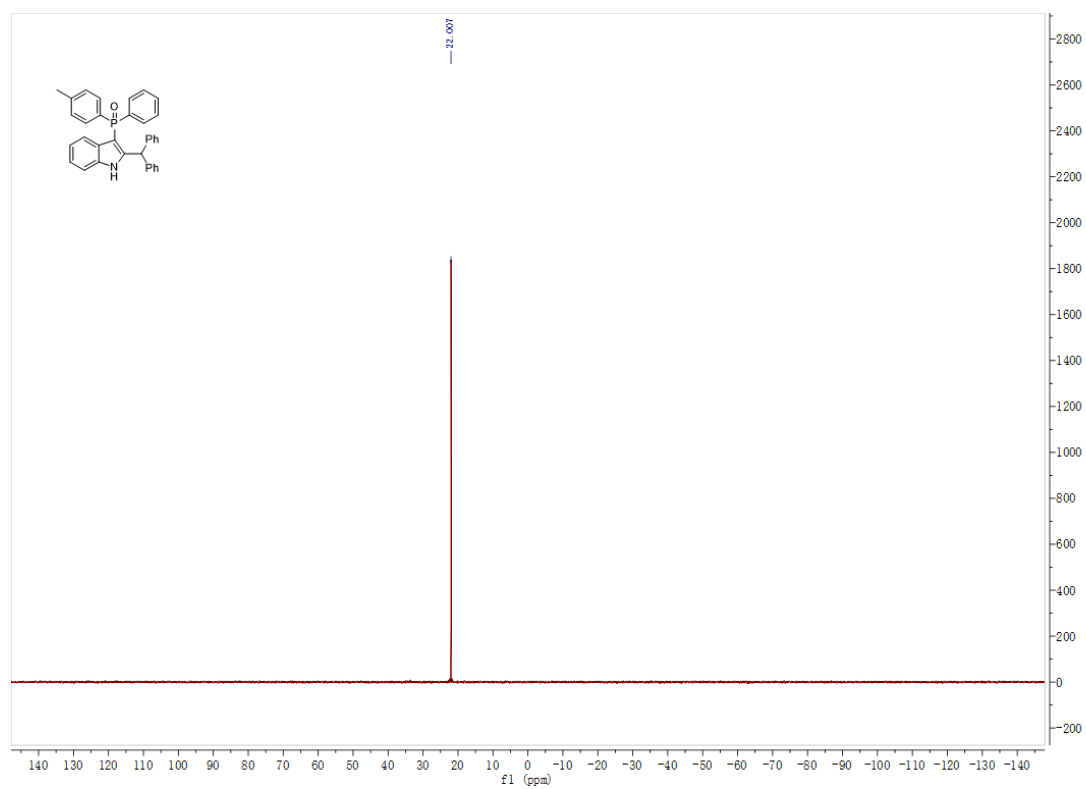

5

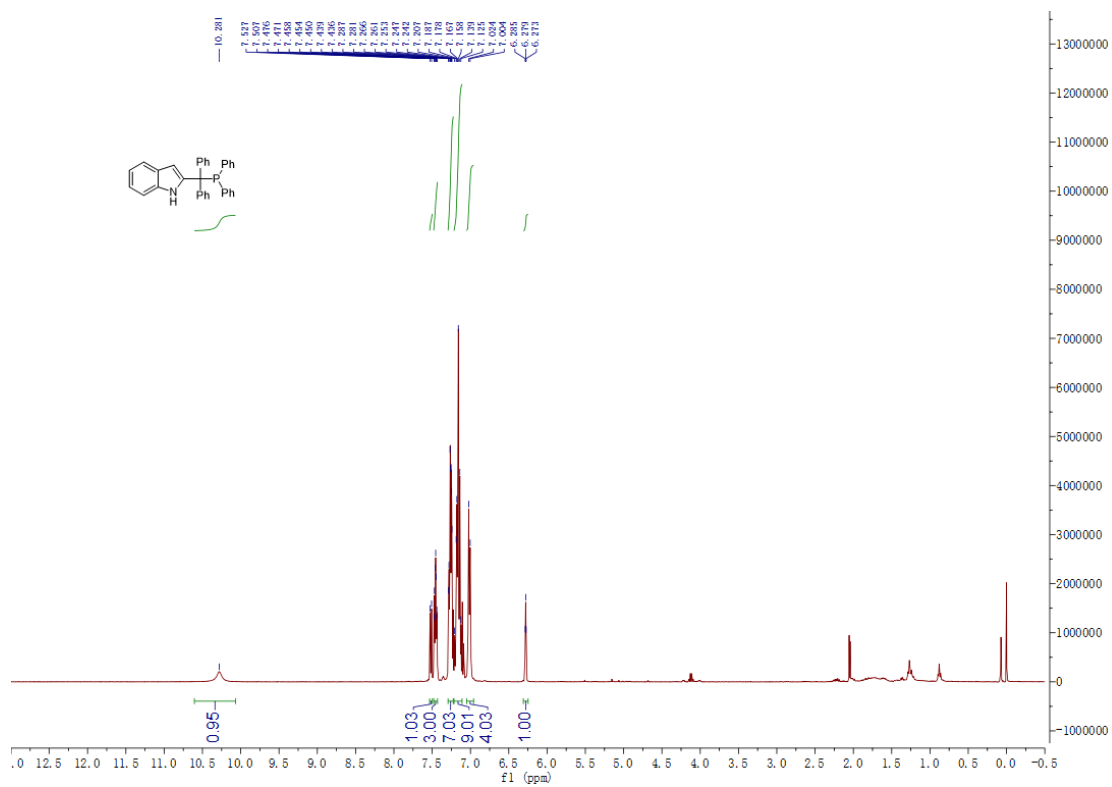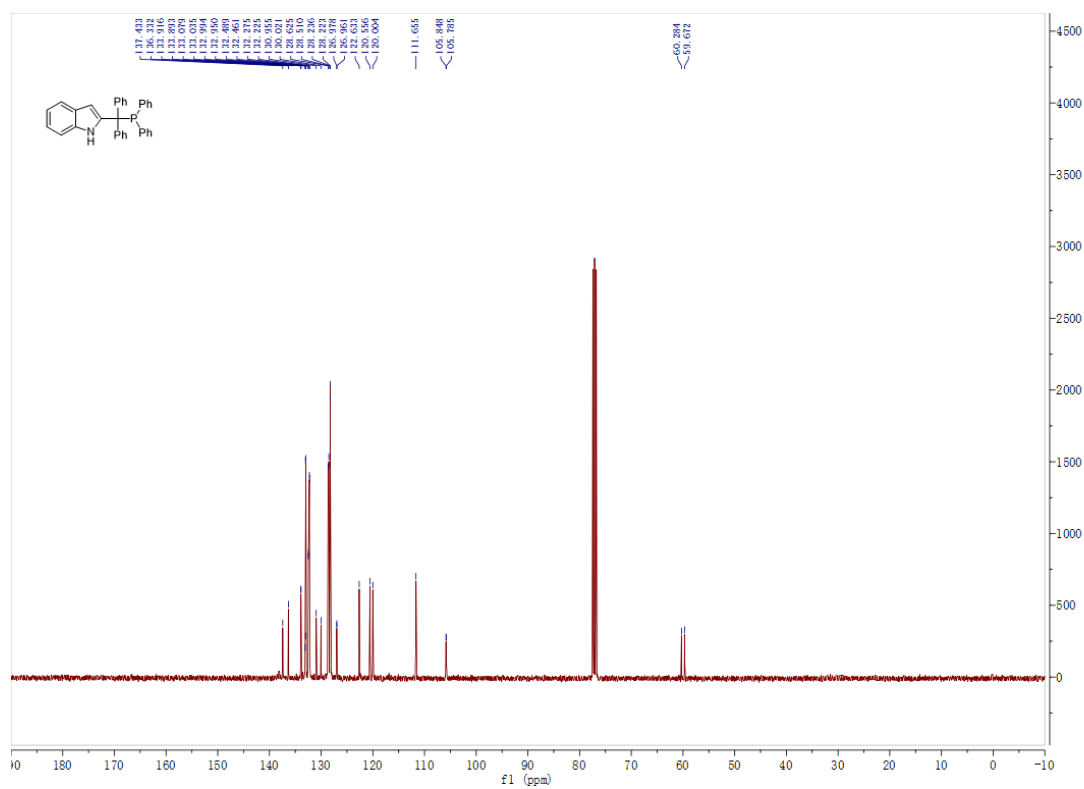





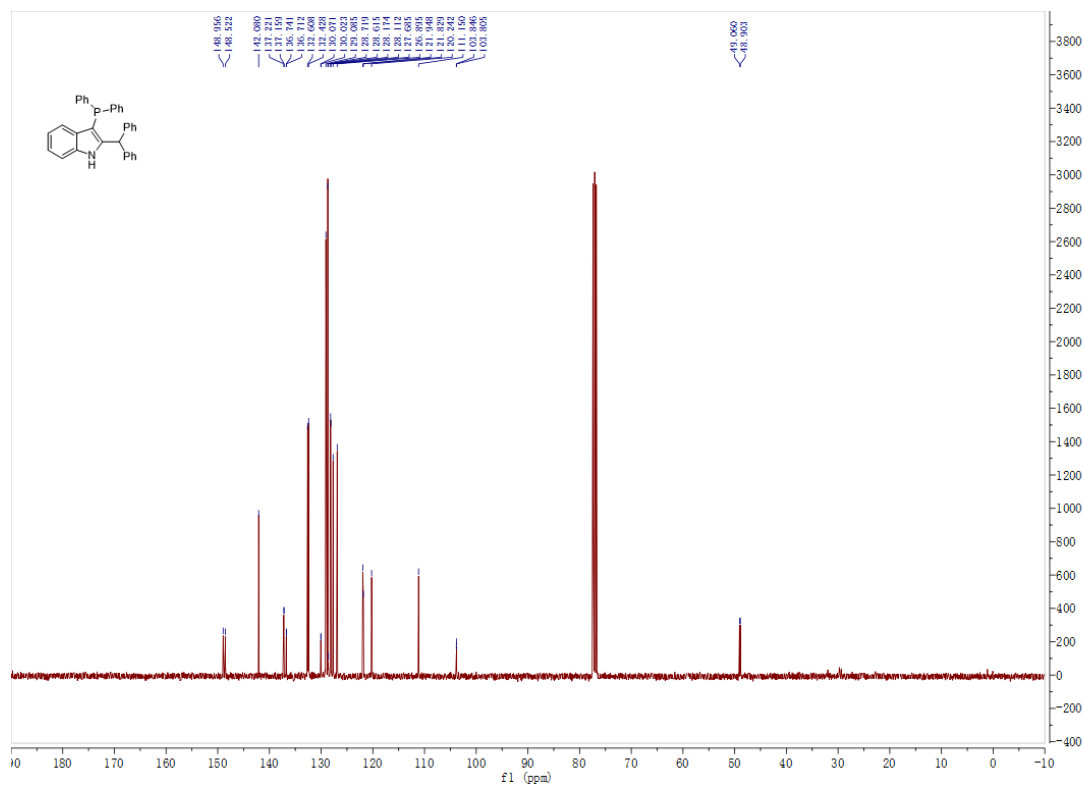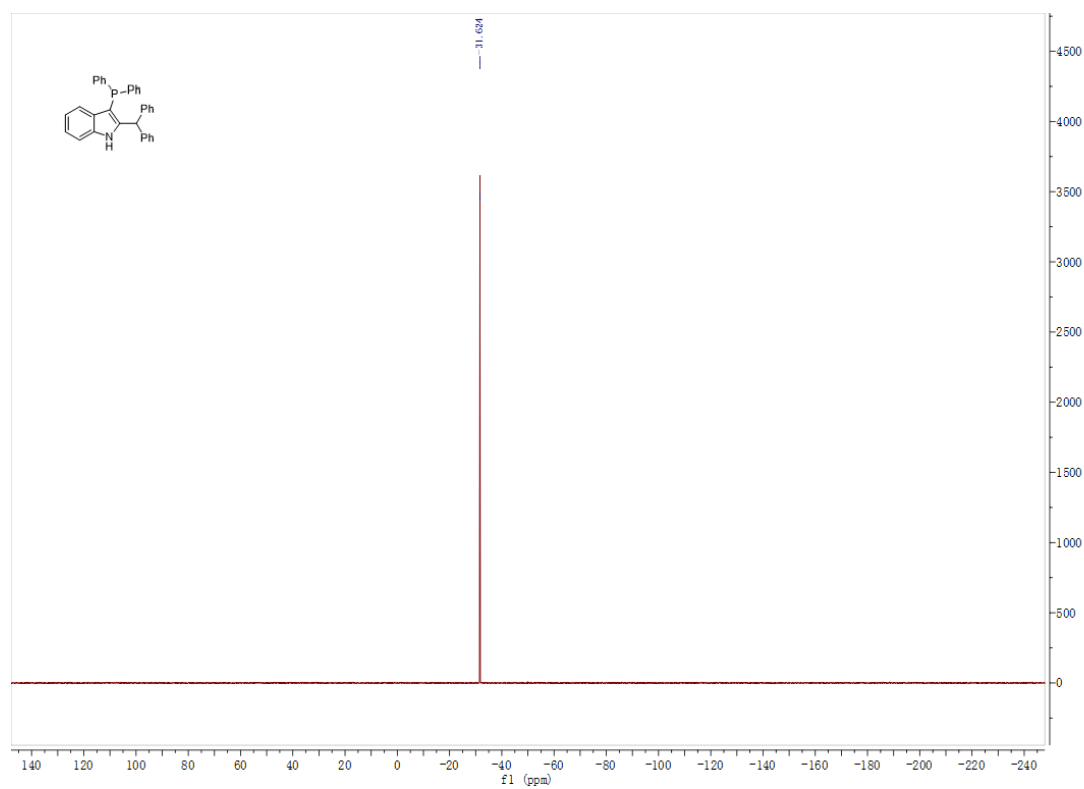

7

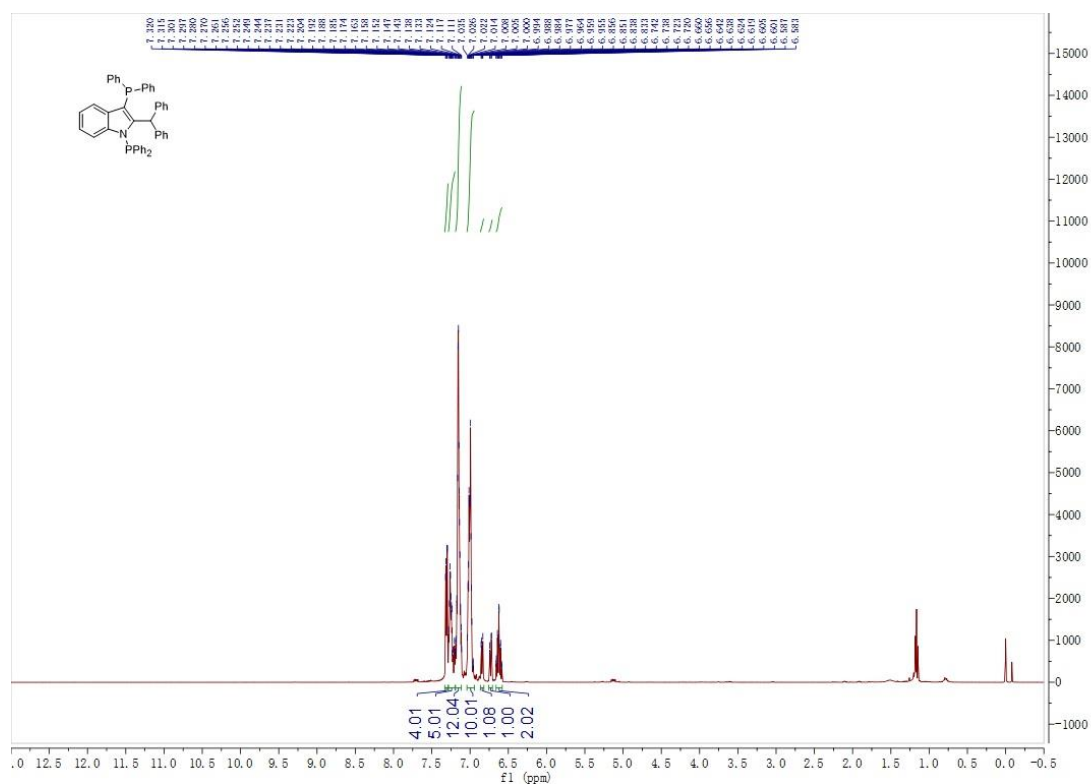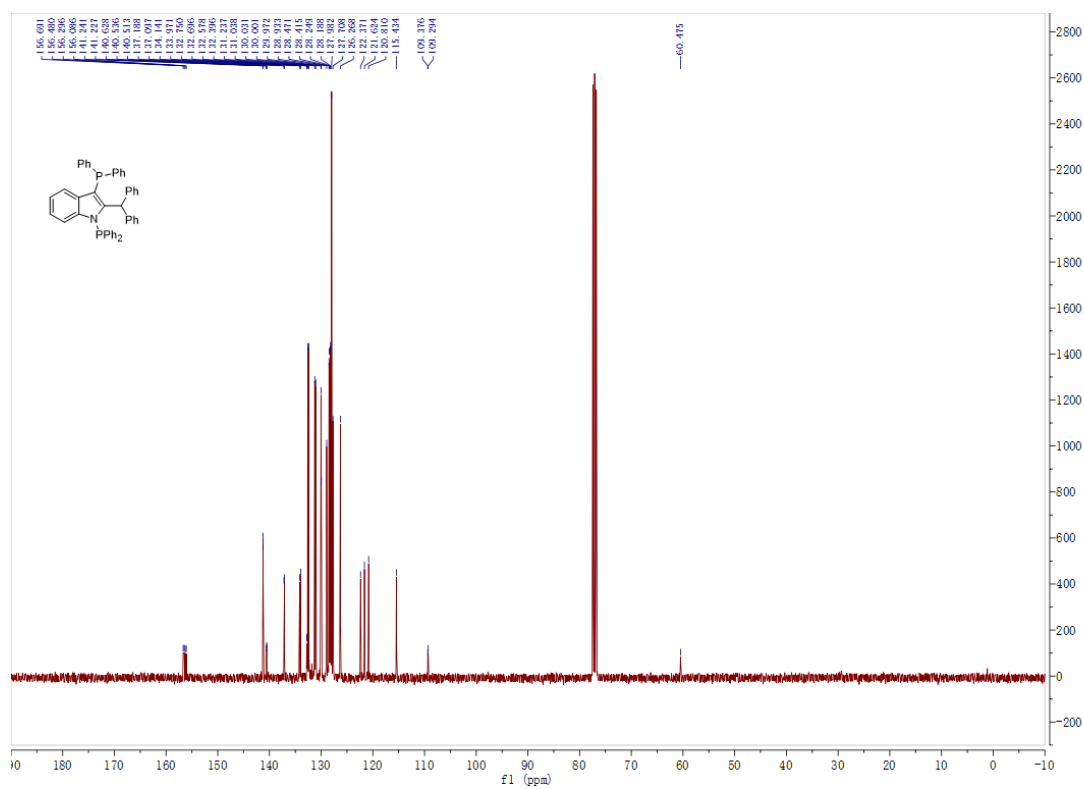

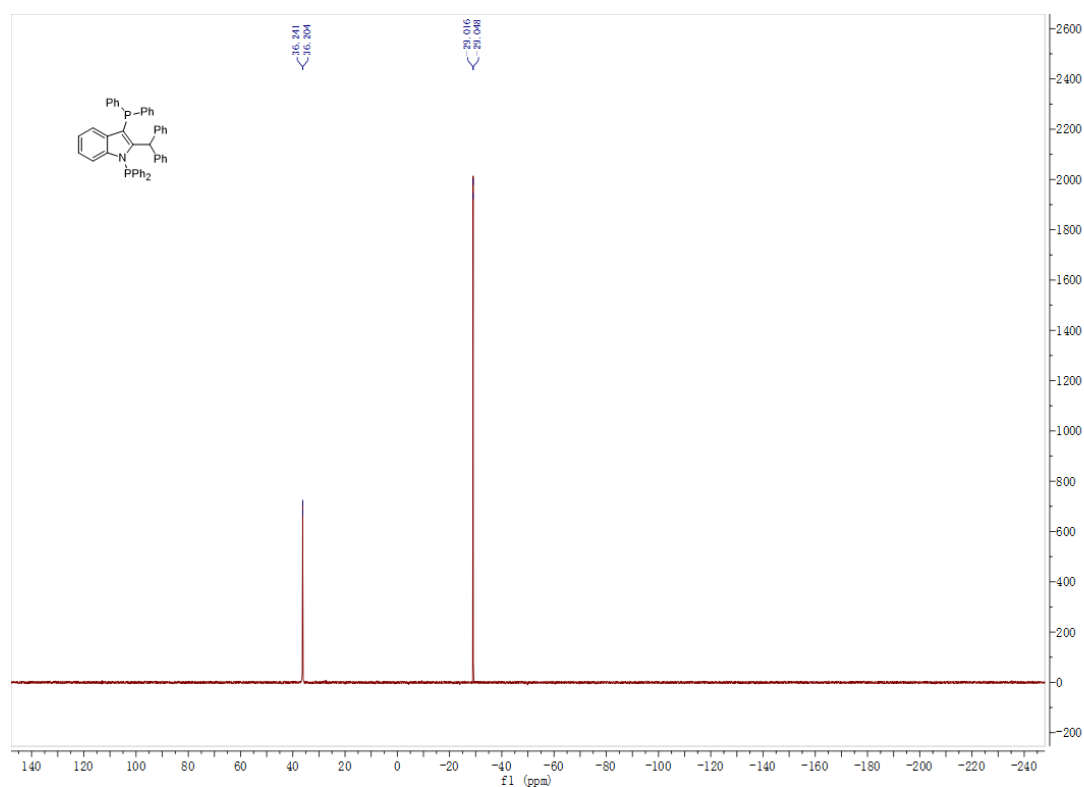

8

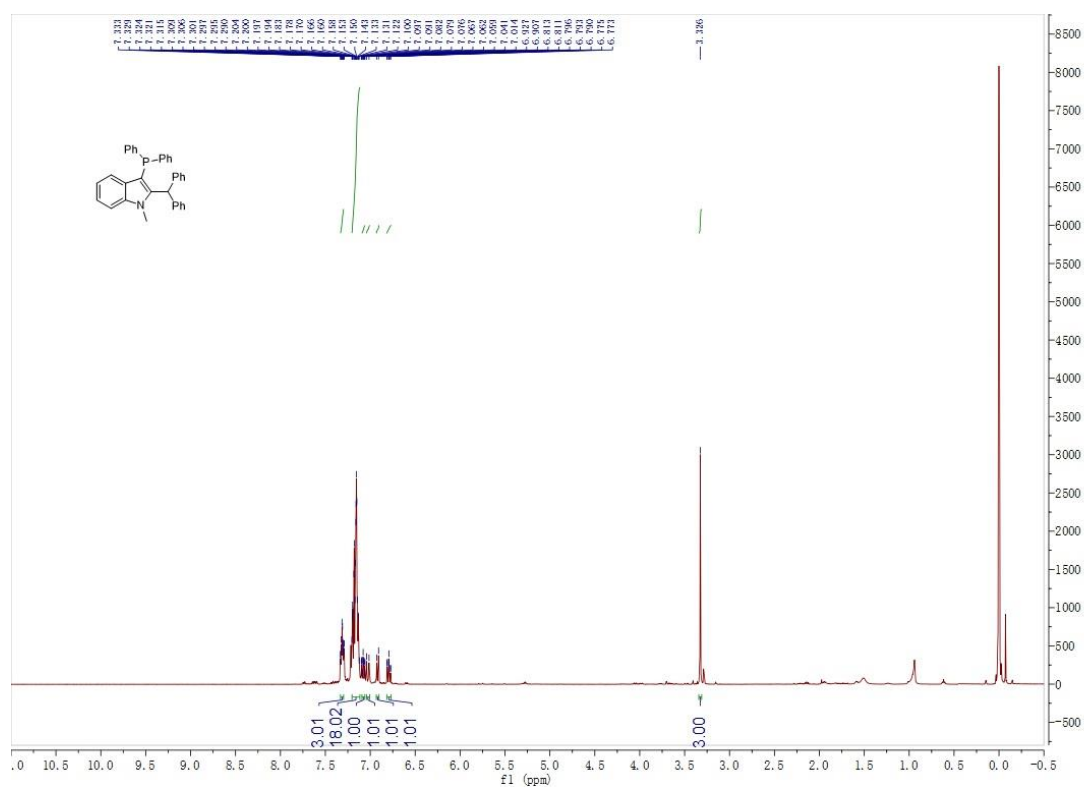

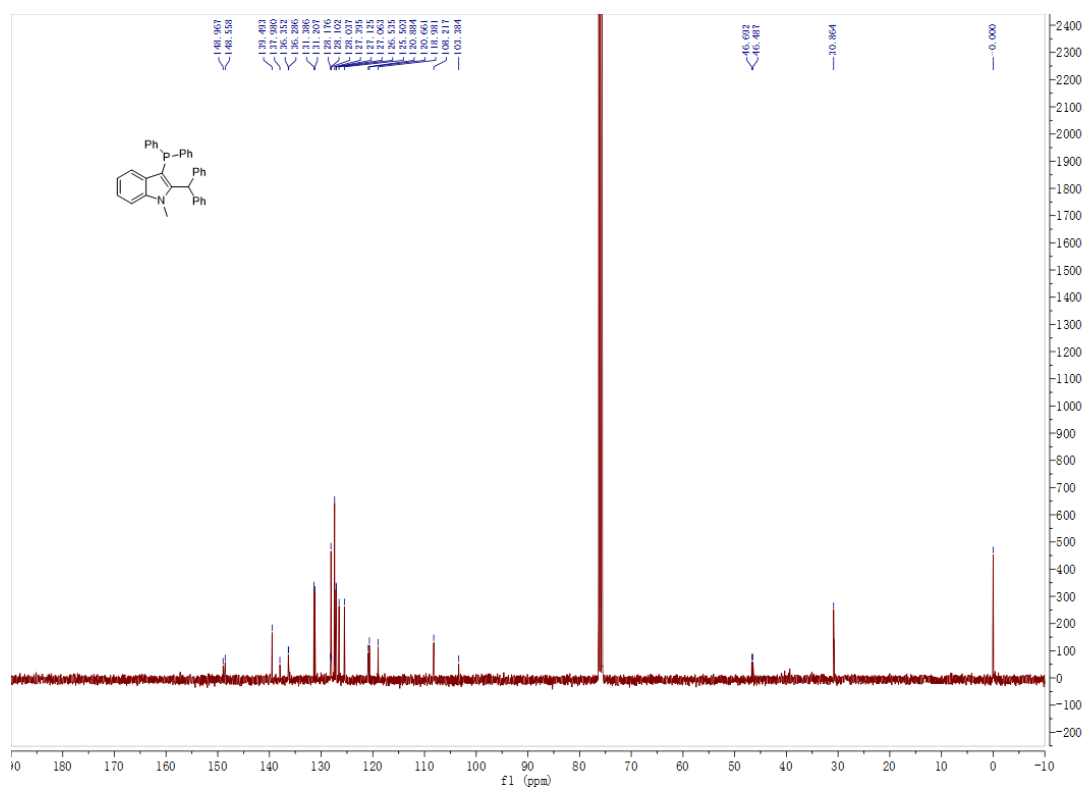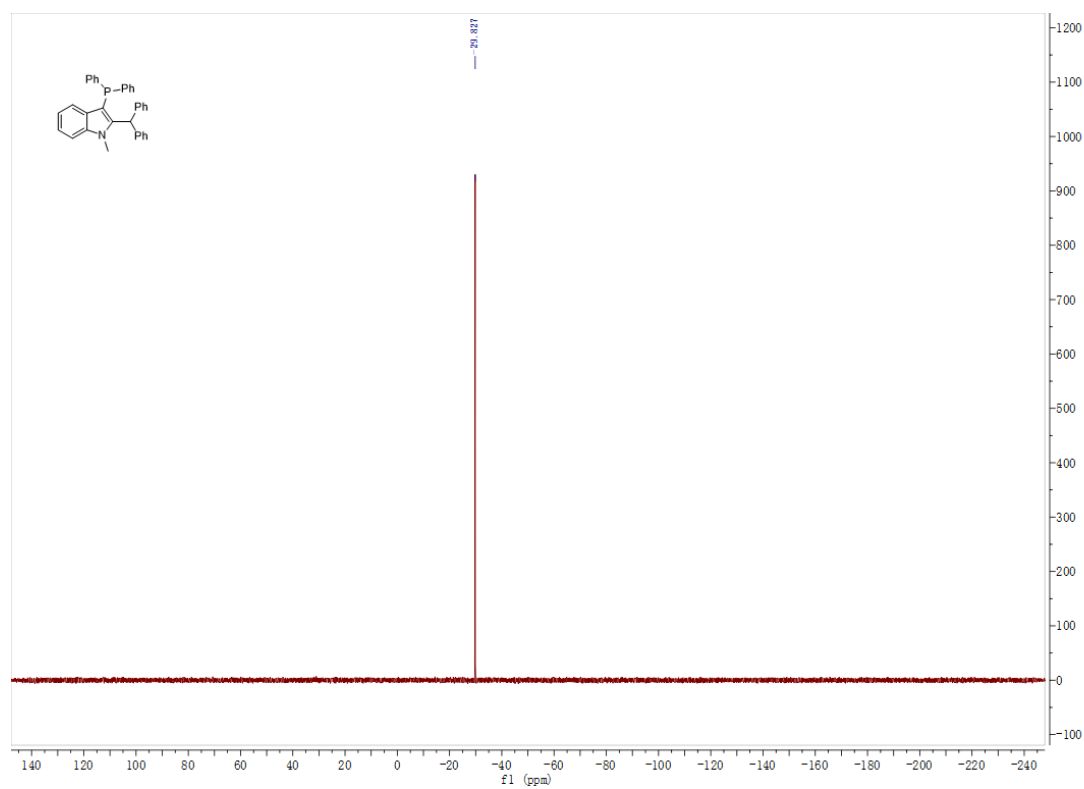

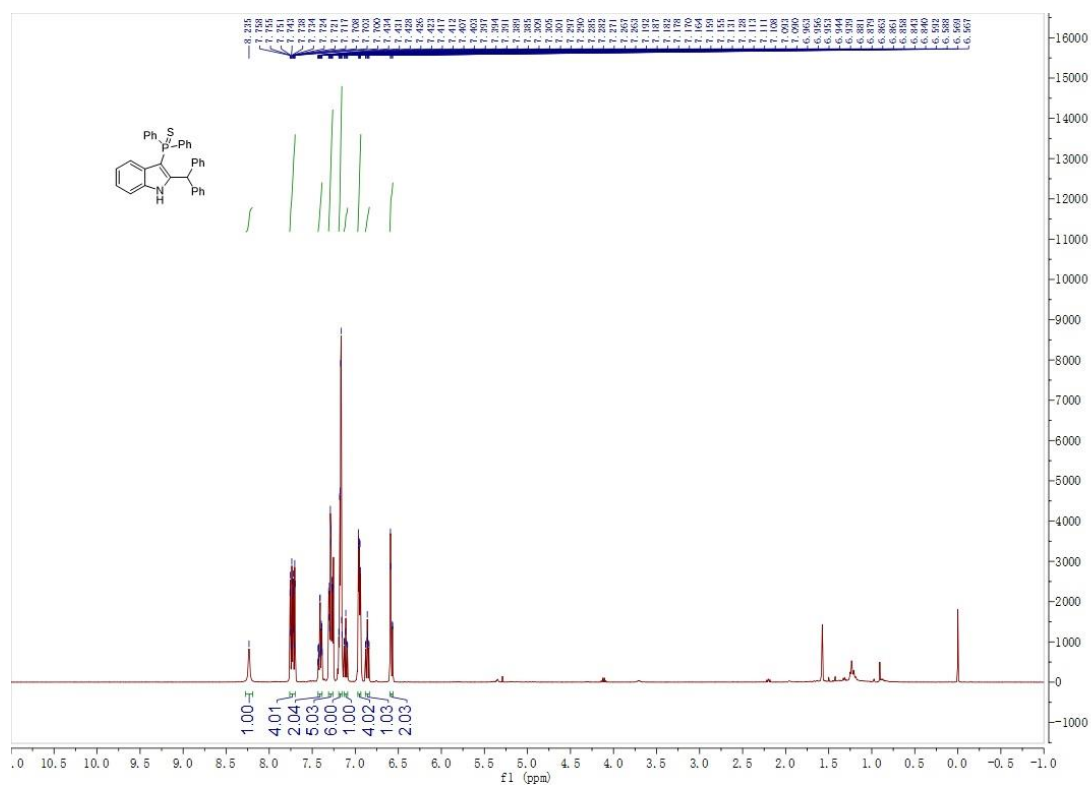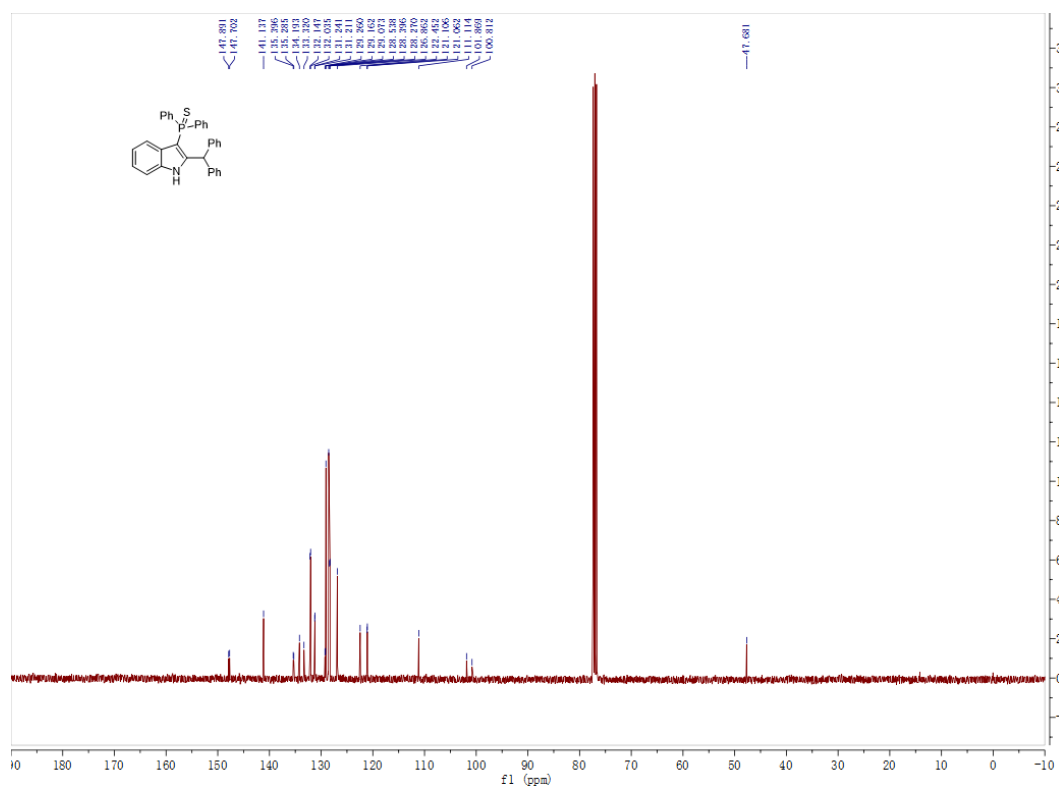

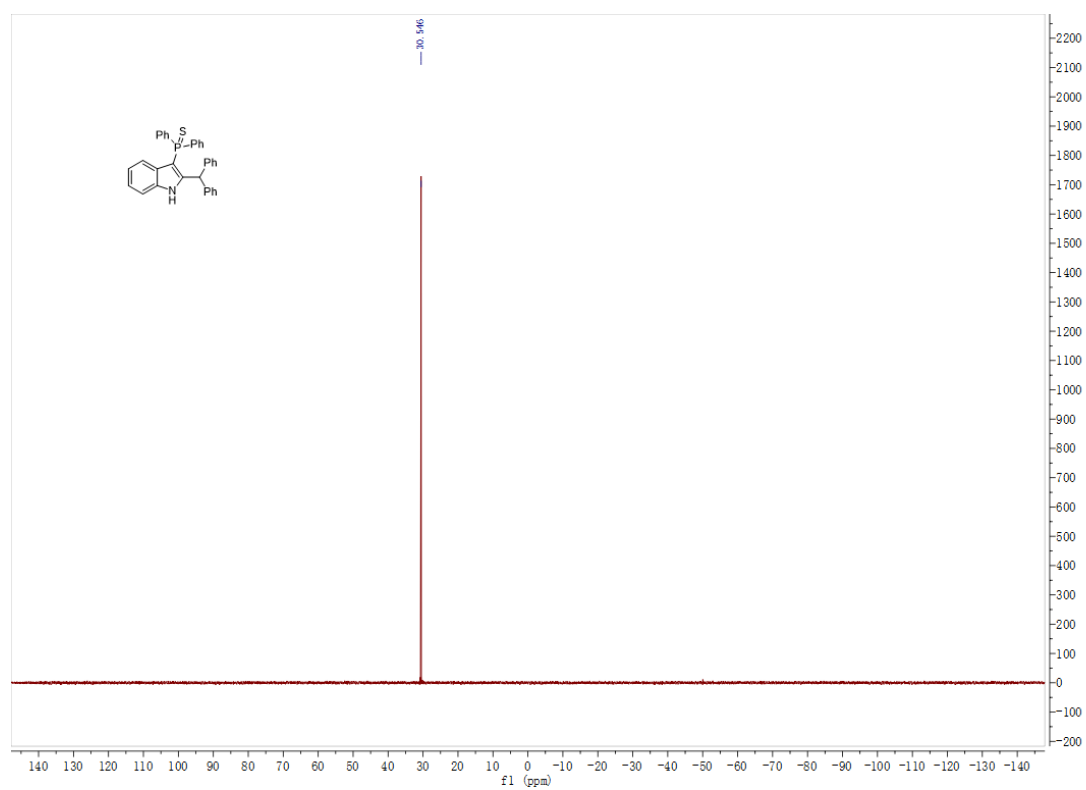

## Crystallographic Data for Compounds **3la** and **4ag**

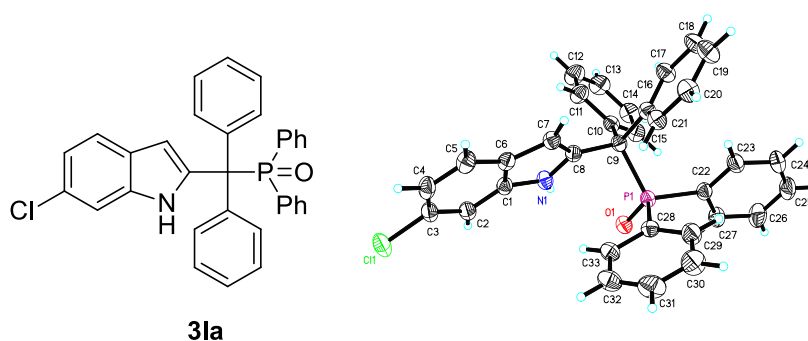

The thermal ellipsoid was drawn at the 30% probability level.

The crystal structure of **3la** has been deposited at the Cambridge Crystallographic Data Centre and allocated the deposition number: CCDC 1824762.

Table 1. Crystal data and structure refinement for **3la**.

|                        |                                                                    |                   |
|------------------------|--------------------------------------------------------------------|-------------------|
| Identification code    | mo_d8v17423_0m                                                     |                   |
| Empirical formula      | C <sub>34</sub> H <sub>28</sub> Cl <sub>1</sub> N O <sub>2</sub> P |                   |
| Formula weight         | 655.34                                                             |                   |
| Temperature            | 296(2) K                                                           |                   |
| Wavelength             | 0.71073 Å                                                          |                   |
| Crystal system         | Monoclinic                                                         |                   |
| Space group            | P 2 <sub>1</sub> /n                                                |                   |
| Unit cell dimensions   | a = 10.0969(3) Å                                                   | a = 90°           |
|                        | b = 24.9962(7) Å                                                   | b = 110.0340(10)° |
|                        | c = 13.2961(4) Å                                                   | γ = 90°           |
| Volume                 | 3152.67(16) Å <sup>3</sup>                                         |                   |
| Z                      | 4                                                                  |                   |
| Density (calculated)   | 1.381 Mg/m <sup>3</sup>                                            |                   |
| Absorption coefficient | 0.459 mm <sup>-1</sup>                                             |                   |
| F(000)                 | 1352                                                               |                   |

|                                   |                                             |
|-----------------------------------|---------------------------------------------|
| Crystal size                      | 0.180 x 0.160 x 0.120 mm <sup>3</sup>       |
| Theta range for data collection   | 1.822 to 25.499°                            |
| Index ranges                      | -12≤h≤12, -30≤k≤30, -16≤l≤16                |
| Reflections collected             | 55408                                       |
| Independent reflections           | 5850 [R(int) = 0.0486]                      |
| Completeness to theta = 25.242°   | 99.7 %                                      |
| Absorption correction             | Semi-empirical from equivalents             |
| Max. and min. transmission        | 0.7456 and 0.6724                           |
| Refinement method                 | Full-matrix least-squares on F <sup>2</sup> |
| Data / restraints / parameters    | 5850 / 24 / 423                             |
| Goodness-of-fit on F <sup>2</sup> | 1.032                                       |
| Final R indices [I>2sigma(I)]     | R1 = 0.0643, wR2 = 0.1730                   |
| R indices (all data)              | R1 = 0.0798, wR2 = 0.1898                   |
| Largest diff. peak and hole       | 0.834 and -0.843 e.Å <sup>-3</sup>          |



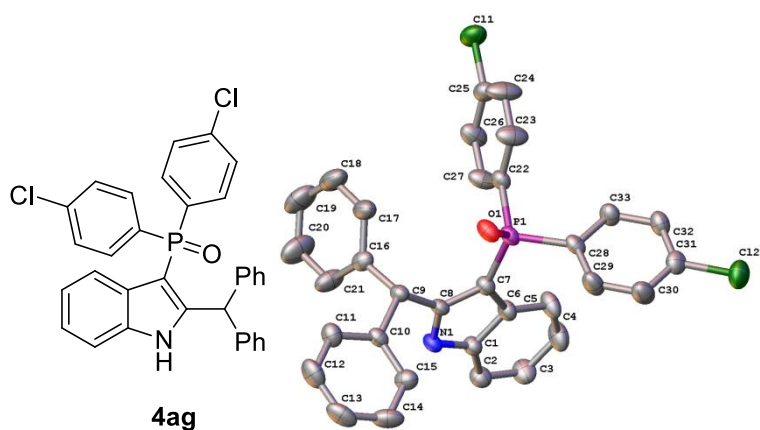

The thermal ellipsoid was drawn at the 30% probability level.

The crystal structure of **4ag** has been deposited at the Cambridge Crystallographic Data Centre and allocated the deposition number: CCDC 1824763.

Table 2. Crystal data and structure refinement for **4ag**.

|                      |                                                                    |         |
|----------------------|--------------------------------------------------------------------|---------|
| Identification code  | 4ag                                                                |         |
| Empirical formula    | C <sub>37</sub> H <sub>32</sub> Cl <sub>2</sub> N O <sub>3</sub> P |         |
| Formula weight       | 640.50                                                             |         |
| Temperature          | 173.01 K                                                           |         |
| Wavelength           | 0.71073 Å                                                          |         |
| Crystal system       | Orthorhombic                                                       |         |
| Space group          | Pbca                                                               |         |
| Unit cell dimensions | a = 13.4763(8) Å                                                   | a = 90° |
|                      | b = 18.3817(10) Å                                                  | b = 90° |
|                      | c = 25.4001(13) Å                                                  | g = 90° |
| Volume               | 6292.0(6) Å <sup>3</sup>                                           |         |
| Z                    | 8                                                                  |         |

|                                   |                                             |
|-----------------------------------|---------------------------------------------|
| Density (calculated)              | 1.352 Mg/m <sup>3</sup>                     |
| Absorption coefficient            | 0.296 mm <sup>-1</sup>                      |
| F(000)                            | 2672                                        |
| Crystal size                      | 0.22 x 0.2 x 0.15 mm <sup>3</sup>           |
| Theta range for data collection   | 2.357 to 26.998°                            |
| Index ranges                      | -14 ≤ h ≤ 17, -22 ≤ k ≤ 23, -32 ≤ l ≤ 31    |
| Reflections collected             | 32407                                       |
| Independent reflections           | 6813 [R(int) = 0.1004]                      |
| Completeness to theta = 25.242°   | 99.2 %                                      |
| Absorption correction             | Semi-empirical from equivalents             |
| Max. and min. transmission        | 0.7456 and 0.6053                           |
| Refinement method                 | Full-matrix least-squares on F <sup>2</sup> |
| Data / restraints / parameters    | 6813 / 82 / 420                             |
| Goodness-of-fit on F <sup>2</sup> | 1.043                                       |
| Final R indices [I > 2σ(I)]       | R1 = 0.0785, wR2 = 0.1926                   |
| R indices (all data)              | R1 = 0.1197, wR2 = 0.2189                   |
| Extinction coefficient            | 0.0050(6)                                   |
| Largest diff. peak and hole       | 1.187 and -0.425 e.Å <sup>-3</sup>          |
